# Supplementary material for: Assembly and analysis of the first complete mitochondrial genome of Punica granatum and the gene transfer from chloroplast genome
Source: PubMed Central journal article supplement (PMC10320729; doi:10.3389/fpls.2023.1132551), 2023-06-21
Supplement: DataSheet_2.pdf [file DataSheet_2.pdf]

## *Supplementary Material*

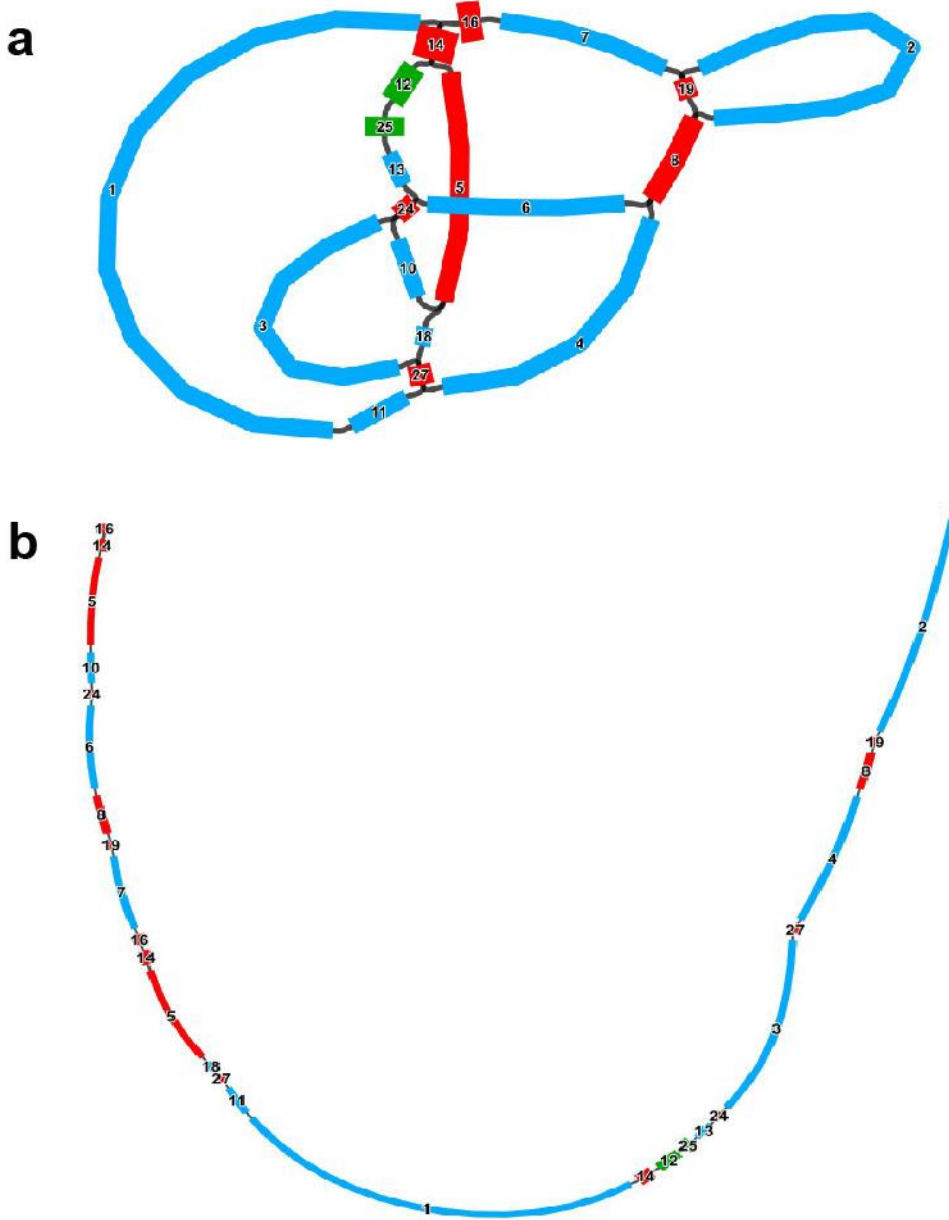

**Figure S1.** Sketch map of *Punica granatum* mitochondrial genome.

a. *Punica granatum* mitochondrial genome sketch; b. Expanded mitochondrial sketch.

**Note:** The red node is the predicted repeat region, the green node is the predicted sequence of chloroplast genome migration to mitochondrial genome, and the blue represents a linear contig single copy region obtained after the duplicate region is resolved based on Nanopore data. Path selection for each node (repeating area) based on Nanopore data, 2-19-8-4-27-3-24-13-25-12-14-1-11-27-18-5-14-16-7-19-8-6-24-10-5-14-16.

**Table S1.** Related genera of *Punica granatum* and their complete mitochondrial genome in GenBank

| <b>Order</b>                   | <b>Genus</b>                          | <b>GenBank</b> |
|--------------------------------|---------------------------------------|----------------|
| Myrtales                       | <i>Punica granatum</i>                | -              |
|                                | <i>Eucalyptus grandis</i>             | NC_040010.1    |
|                                | <i>Lagerstroemia indica</i>           | NC_035616.1    |
|                                | <i>Oenothera biennis</i>              | MZ934756.1     |
|                                | <i>Oenothera villaricae</i>           | MZ934755.1     |
|                                | <i>Oenothera elata subsp. hookeri</i> | MZ934757.1     |
|                                | <i>Medinilla magnifica</i>            | MT043351.1     |
| Sapindales                     | <i>Mangifera longipes</i>             | NC_060990.1    |
|                                | <i>Citrus unshiu</i>                  | NC_057142.1    |
|                                | <i>Citrus maxima</i>                  | NC_057143.1    |
|                                | <i>Sapindus mukorossi</i>             | NC_050850.1    |
|                                | <i>Spondias mombin</i>                | NC_045035.1    |
|                                | <i>Spondias tuberosa</i>              | NC_045036.1    |
|                                | <i>Citrus sinensis</i>                | NC_037463.1    |
|                                | <i>Toona ciliata</i>                  | NC_065060.1    |
|                                | <i>Mangifera sylvatica</i>            | MZ751077.1     |
|                                | <i>Cotinus coggygria</i>              | MZ089853.1     |
|                                | <i>Acer miaotaiense</i>               | MZ636518.1     |
|                                | <i>Nitraria tangutorum</i>            | MK431824.1     |
|                                | <i>Peganum harmala</i>                | MK431826.1     |
|                                | <i>Acer truncatum</i>                 | MZ318049.1     |
| <i>Xanthoceras sorbifolium</i> | MK333231.1                            |                |
| Malvales                       | <i>Aquilaria sinensis</i>             | NC_054354.1    |
|                                | <i>Gossypium harknessii</i>           | NC_027407.1    |
|                                | <i>Hibiscus cannabinus</i>            | NC_035549.1    |
|                                | <i>Bombax ceiba</i>                   | NC_038052.1    |
|                                | <i>Gossypium barbadense</i>           | NC_028254.1    |
|                                | <i>Theobroma grandiflorum</i>         | NC_066895.1    |
| Zygophyllales                  | <i>Zygophyllum fabago</i>             | MK431827.1     |
|                                | <i>Tribulus terrestris</i>            | MK431825.1     |

**Table S2.** Primer sequences used for RNA editing

| <b>Gene Name-</b>   |                               |                               |
|---------------------|-------------------------------|-------------------------------|
| <b>Editing Site</b> | <b>Forward primer (5'-3')</b> | <b>Reverse primer (5'-3')</b> |
| <i>atp9-223</i>     | TTGGAAACGTCTTCAGTT            | CGGGGACTAGCTCTTTA             |
| <i>nad1-2</i>       | TACTTGGTGAAATGGGT             | AGGTAGCTTGCTTACTCT            |
| <i>rps10-2</i>      | GAGTACAATCCGATGCC             | AATCCAATCTTCCGTGT             |
| <i>rps10-331</i>    | GCAAGACTCGTTCGGATAA           | AGCATGTGCCCATCACT             |

**Table S3.** Relative synonymous codon usage (RSCU) of each amino acid pair in the mitochondrial genome of *Punica granatum*

| <b>Amino</b> | <b>Codon 1</b> | <b>Codon 2</b> | <b>Codon 3</b> | <b>Codon 4</b> | <b>Codon 5</b> | <b>Codon 6</b> |
|--------------|----------------|----------------|----------------|----------------|----------------|----------------|
|              | <b>RSCU</b>    | <b>RSCU</b>    | <b>RSCU</b>    | <b>RSCU</b>    | <b>RSCU</b>    | <b>RSCU</b>    |
| Ala          | GCU            | GCA            | GCC            | GCG            |                |                |
|              | 1.63           | 0.99           | 0.95           | 0.43           |                |                |
| Arg          | AGA            | CGA            | CGU            | AGG            | CGG            | CGC            |
|              | 1.43           | 1.33           | 1.23           | 0.78           | 0.73           | 0.49           |
| Asn          | AAU            | AAC            |                |                |                |                |
|              | 1.33           | 0.67           |                |                |                |                |
| Asp          | GAU            | GAC            |                |                |                |                |
|              | 1.37           | 0.63           |                |                |                |                |
| Cys          | UGU            | UGC            |                |                |                |                |
|              | 1.16           | 0.84           |                |                |                |                |
| End          | UAA            | UGA            | UAG            |                |                |                |
|              | 2.18           | 0.55           | 0.27           |                |                |                |
| Gln          | CAA            | CAG            |                |                |                |                |
|              | 1.49           | 0.51           |                |                |                |                |
| Glu          | GAA            | GAG            |                |                |                |                |
|              | 1.36           | 0.64           |                |                |                |                |
| Gly          | GGA            | GGU            | GGG            | GGC            |                |                |
|              | 1.45           | 1.26           | 0.76           | 0.52           |                |                |
| His          | CAU            | CAC            |                |                |                |                |
|              | 1.53           | 0.47           |                |                |                |                |
| Ile          | AUU            | AUC            | AUA            |                |                |                |
|              | 1.31           | 0.88           | 0.81           |                |                |                |
| Leu          | UUA            | CUU            | UUG            | CUA            | CUC            | CUG            |
|              | 1.37           | 1.27           | 1.22           | 0.94           | 0.61           | 0.59           |
| Lys          | AAA            | AAG            |                |                |                |                |
|              | 1.19           | 0.81           |                |                |                |                |
| Met          | AUG            |                |                |                |                |                |
|              | 1              |                |                |                |                |                |
| Phe          | UUU            | UUC            |                |                |                |                |
|              | 1.11           | 0.89           |                |                |                |                |

|     |      |      |      |      |      |      |
|-----|------|------|------|------|------|------|
| Pro | CCU  | CCA  | CCC  | CCG  |      |      |
|     | 1.48 | 1.06 | 0.87 | 0.6  |      |      |
| Ser | UCU  | UCA  | AGU  | UCC  | UCG  | AGC  |
|     | 1.38 | 1.15 | 1.03 | 0.98 | 0.83 | 0.63 |
| Thr | ACU  | ACA  | ACC  | ACG  |      |      |
|     | 1.39 | 1.03 | 1    | 0.58 |      |      |
| Trp | UGG  |      |      |      |      |      |
|     | 1    |      |      |      |      |      |
| Tyr | UAU  | UAC  |      |      |      |      |
|     | 1.49 | 0.51 |      |      |      |      |
| Val | GUU  | GUA  | GUG  | GUC  |      |      |
|     | 1.18 | 1.17 | 0.87 | 0.78 |      |      |

---

**Table S4.** SSRs in the mitochondrial genome of *Punica granatum*

| SSR nr. | SSR type | SSR      | size | start  | end    |
|---------|----------|----------|------|--------|--------|
| 1       | p1       | (A)10    | 10   | 5006   | 5015   |
| 2       | p4       | (TAAA)3  | 12   | 11878  | 11889  |
| 3       | p5       | (CTTCG)3 | 15   | 16051  | 16065  |
| 4       | p3       | (TCA)4   | 12   | 20340  | 20351  |
| 5       | p3       | (TTA)4   | 12   | 25701  | 25712  |
| 6       | p1       | (T)10    | 10   | 29854  | 29863  |
| 7       | p2       | (GA)5    | 10   | 40974  | 40983  |
| 8       | p4       | (CGCC)3  | 12   | 41291  | 41302  |
| 9       | p3       | (ATA)4   | 12   | 41483  | 41494  |
| 10      | p4       | (ATGA)3  | 12   | 48202  | 48213  |
| 11      | p1       | (T)12    | 12   | 51376  | 51387  |
| 12      | p1       | (T)10    | 10   | 54664  | 54673  |
| 13      | p4       | (ACTC)3  | 12   | 59986  | 59997  |
| 14      | p4       | (TCTA)3  | 12   | 60027  | 60038  |
| 15      | p1       | (T)10    | 10   | 61234  | 61243  |
| 16      | p1       | (T)10    | 10   | 62634  | 62643  |
| 17      | p1       | (A)10    | 10   | 63559  | 63568  |
| 18      | p2       | (AT)5    | 10   | 67277  | 67286  |
| 19      | p1       | (T)11    | 11   | 67772  | 67782  |
| 20      | p4       | (AGAT)3  | 12   | 68757  | 68768  |
| 21      | p1       | (A)10    | 10   | 71616  | 71625  |
| 22      | p1       | (G)10    | 10   | 74648  | 74657  |
| 23      | p5       | (ATTTC)3 | 15   | 78084  | 78098  |
| 24      | p2       | (TC)5    | 10   | 83187  | 83196  |
| 25      | p4       | (ATTC)3  | 12   | 83375  | 83386  |
| 26      | p2       | (TA)5    | 10   | 84613  | 84622  |
| 27      | p4       | (AGTA)4  | 16   | 87774  | 87789  |
| 28      | p4       | (GAAA)3  | 12   | 89864  | 89875  |
| 29      | p2       | (TC)5    | 10   | 91052  | 91061  |
| 30      | p4       | (ACAA)3  | 12   | 94129  | 94140  |
| 31      | p1       | (A)10    | 10   | 100390 | 100399 |
| 32      | p4       | (TAAA)3  | 12   | 107262 | 107273 |

|    |    |           |    |        |        |
|----|----|-----------|----|--------|--------|
| 33 | p5 | (CTTCG)3  | 15 | 111435 | 111449 |
| 34 | p3 | (TCA)4    | 12 | 115724 | 115735 |
| 35 | p3 | (TTA)4    | 12 | 121085 | 121096 |
| 36 | p1 | (T)10     | 10 | 125238 | 125247 |
| 37 | p1 | (T)13     | 13 | 129559 | 129571 |
| 38 | p1 | (G)12     | 12 | 130860 | 130871 |
| 39 | p1 | (T)10     | 10 | 136556 | 136565 |
| 40 | p1 | (A)10     | 10 | 136765 | 136774 |
| 41 | p3 | (CAT)4    | 12 | 140092 | 140103 |
| 42 | p4 | (AAGA)3   | 12 | 142266 | 142277 |
| 43 | p4 | (AAAG)3   | 12 | 142745 | 142756 |
| 44 | p2 | (TC)5     | 10 | 142888 | 142897 |
| 45 | p6 | (ACTCGG)3 | 18 | 148076 | 148093 |
| 46 | p4 | (GCTT)3   | 12 | 149194 | 149205 |
| 47 | p2 | (AG)5     | 10 | 151684 | 151693 |
| 48 | p1 | (A)10     | 10 | 153397 | 153406 |
| 49 | p2 | (CT)5     | 10 | 153533 | 153542 |
| 50 | p1 | (A)10     | 10 | 154382 | 154391 |
| 51 | p1 | (T)10     | 10 | 154463 | 154472 |
| 52 | p1 | (A)12     | 12 | 155008 | 155019 |
| 53 | p4 | (CTTT)3   | 12 | 155639 | 155650 |
| 54 | p1 | (T)14     | 14 | 156031 | 156044 |
| 55 | p4 | (TGAC)3   | 12 | 164630 | 164641 |
| 56 | p3 | (TAG)4    | 12 | 165903 | 165914 |
| 57 | p6 | (CCTTCG)3 | 18 | 166856 | 166873 |
| 58 | p1 | (A)10     | 10 | 167584 | 167593 |
| 59 | p1 | (T)10     | 10 | 167765 | 167774 |
| 60 | p1 | (A)10     | 10 | 168526 | 168535 |
| 61 | p5 | (GAAAT)3  | 15 | 168877 | 168891 |
| 62 | p3 | (AAG)4    | 12 | 169844 | 169855 |
| 63 | p1 | (T)13     | 13 | 171074 | 171086 |
| 64 | p4 | (TAAG)3   | 12 | 171384 | 171395 |
| 65 | p3 | (AGT)4    | 12 | 172372 | 172383 |
| 66 | p4 | (AAGT)3   | 12 | 172490 | 172501 |

|     |    |          |    |        |        |
|-----|----|----------|----|--------|--------|
| 67  | p4 | (GCCT)3  | 12 | 177466 | 177477 |
| 68  | p1 | (A)10    | 10 | 183130 | 183139 |
| 69  | p1 | (C)11    | 11 | 184666 | 184676 |
| 70  | p5 | (ACTTT)3 | 15 | 185465 | 185479 |
| 71  | p1 | (A)10    | 10 | 188108 | 188117 |
| 72  | p1 | (G)10    | 10 | 189310 | 189319 |
| 73  | p1 | (A)10    | 10 | 196731 | 196740 |
| 74  | p1 | (A)10    | 10 | 197726 | 197735 |
| 75  | p1 | (A)10    | 10 | 197966 | 197975 |
| 76  | p4 | (CTTT)3  | 12 | 201533 | 201544 |
| 77  | p1 | (A)12    | 12 | 206725 | 206736 |
| 78  | p4 | (CTTA)3  | 12 | 212997 | 213008 |
| 79  | p5 | (TTTTA)3 | 15 | 222386 | 222400 |
| 80  | p1 | (T)10    | 10 | 224336 | 224345 |
| 81  | p1 | (A)11    | 11 | 224371 | 224381 |
| 82  | p1 | (A)10    | 10 | 230238 | 230247 |
| 83  | p1 | (A)15    | 15 | 235601 | 235615 |
| 84  | p2 | (AG)5    | 10 | 238475 | 238484 |
| 85  | p1 | (T)10    | 10 | 239049 | 239058 |
| 86  | p4 | (AAGG)3  | 12 | 241875 | 241886 |
| 87  | p1 | (A)10    | 10 | 242753 | 242762 |
| 88  | p3 | (TTA)4   | 12 | 243826 | 243837 |
| 89  | p2 | (GA)5    | 10 | 244927 | 244936 |
| 90  | p1 | (T)11    | 11 | 245217 | 245227 |
| 91  | p4 | (TTTC)3  | 12 | 246252 | 246263 |
| 92  | p3 | (AAG)4   | 12 | 254050 | 254061 |
| 93  | p1 | (T)10    | 10 | 257075 | 257084 |
| 94  | p3 | (GAA)4   | 12 | 257985 | 257996 |
| 95  | p1 | (T)10    | 10 | 259945 | 259954 |
| 96  | p4 | (AATG)3  | 12 | 262875 | 262886 |
| 97  | p1 | (G)10    | 10 | 262956 | 262965 |
| 98  | p2 | (AT)5    | 10 | 265149 | 265158 |
| 99  | p2 | (CT)5    | 10 | 275032 | 275041 |
| 100 | p1 | (T)14    | 14 | 277924 | 277937 |



|     |    |          |    |        |        |
|-----|----|----------|----|--------|--------|
| 101 | p3 | (CAG)4   | 12 | 278611 | 278622 |
| 102 | p1 | (C)14    | 14 | 279846 | 279859 |
| 103 | p2 | (TA)7    | 14 | 283363 | 283376 |
| 104 | p1 | (T)11    | 11 | 283885 | 283895 |
| 105 | p1 | (A)10    | 10 | 287800 | 287809 |
| 106 | p1 | (A)11    | 11 | 288388 | 288398 |
| 107 | p3 | (TCC)5   | 15 | 293008 | 293022 |
| 108 | p1 | (T)11    | 11 | 301680 | 301690 |
| 109 | p4 | (TGAT)3  | 12 | 302859 | 302870 |
| 110 | p5 | (CAAGA)3 | 15 | 312912 | 312926 |
| 111 | p4 | (AAGC)3  | 12 | 313548 | 313559 |
| 112 | p4 | (GAGG)3  | 12 | 318458 | 318469 |
| 113 | p5 | (GAAAT)3 | 15 | 322586 | 322600 |
| 114 | p2 | (AT)5    | 10 | 328899 | 328908 |
| 115 | p1 | (T)11    | 11 | 329394 | 329404 |
| 116 | p4 | (AGAT)3  | 12 | 330379 | 330390 |
| 117 | p1 | (A)10    | 10 | 333238 | 333247 |
| 118 | p1 | (G)10    | 10 | 336270 | 336279 |
| 119 | p2 | (AT)5    | 10 | 343674 | 343683 |
| 120 | p4 | (TTAT)3  | 12 | 348393 | 348404 |
| 121 | p2 | (CG)5    | 10 | 350095 | 350104 |
| 122 | p1 | (A)10    | 10 | 354652 | 354661 |
| 123 | p1 | (A)11    | 11 | 357411 | 357421 |
| 124 | p1 | (A)10    | 10 | 358277 | 358286 |
| 125 | p2 | (TA)5    | 10 | 360270 | 360279 |
| 126 | p4 | (TAGC)3  | 12 | 362048 | 362059 |
| 127 | p1 | (C)11    | 11 | 362858 | 362868 |
| 128 | p4 | (ACCG)3  | 12 | 364008 | 364019 |
| 129 | p4 | (TCAT)3  | 12 | 365065 | 365076 |
| 130 | p2 | (GA)5    | 10 | 366696 | 366705 |
| 131 | p3 | (AGC)4   | 12 | 367328 | 367339 |
| 132 | p3 | (ATA)4   | 12 | 368290 | 368301 |
| 133 | p1 | (G)13    | 13 | 369262 | 369274 |
| 134 | p2 | (TA)5    | 10 | 369441 | 369450 |

|     |    |          |    |        |        |
|-----|----|----------|----|--------|--------|
| 135 | p1 | (T)13    | 13 | 372612 | 372624 |
| 136 | p3 | (GAA)4   | 12 | 372795 | 372806 |
| 137 | p1 | (T)10    | 10 | 376218 | 376227 |
| 138 | p5 | (TCAAG)5 | 25 | 377800 | 377824 |
| 139 | p4 | (TCGC)3  | 12 | 378932 | 378943 |
| 140 | p1 | (T)10    | 10 | 388725 | 388734 |
| 141 | p1 | (A)13    | 13 | 390013 | 390025 |
| 142 | p4 | (TGAA)3  | 12 | 390506 | 390517 |
| 143 | p4 | (GTCA)3  | 12 | 392710 | 392721 |
| 144 | p4 | (GCTG)3  | 12 | 392946 | 392957 |
| 145 | p2 | (GA)5    | 10 | 396138 | 396147 |
| 146 | p3 | (TTC)4   | 12 | 398946 | 398957 |

---

**Table S5.** Tandem repeat sequences in the mitochondrial genome of *Punica granatum*

| Indices        | Period Size | Copy Number | Consensus Size | Percent Matches | Percent Indels | Score | A  | C  | G  | T  | Entropy (0-2) |
|----------------|-------------|-------------|----------------|-----------------|----------------|-------|----|----|----|----|---------------|
| 36479--36534   | 29          | 1.9         | 29             | 85              | 0              | 84    | 25 | 23 | 21 | 30 | 1.99          |
| 69874--69899   | 13          | 2           | 13             | 100             | 0              | 52    | 30 | 15 | 23 | 30 | 1.95          |
| 73404--73439   | 16          | 2.2         | 16             | 85              | 0              | 51    | 55 | 30 | 11 | 2  | 1.49          |
| 89504--89541   | 20          | 2           | 20             | 84              | 5              | 55    | 31 | 34 | 26 | 7  | 1.85          |
| 136808--136840 | 14          | 2.4         | 14             | 90              | 5              | 52    | 27 | 15 | 0  | 57 | 1.38          |
| 165910--165950 | 15          | 2.7         | 15             | 84              | 0              | 61    | 31 | 29 | 19 | 19 | 1.96          |
| 233699--233736 | 18          | 2.1         | 18             | 90              | 0              | 62    | 60 | 5  | 7  | 26 | 1.46          |
| 233693--233739 | 23          | 2           | 23             | 84              | 8              | 64    | 59 | 6  | 8  | 25 | 1.5           |
| 274364--274392 | 14          | 2.1         | 14             | 93              | 0              | 51    | 27 | 24 | 17 | 31 | 1.97          |
| 304836--304877 | 21          | 2           | 22             | 90              | 4              | 70    | 11 | 47 | 14 | 26 | 1.78          |
| 310642--310684 | 18          | 2.4         | 18             | 81              | 18             | 54    | 18 | 20 | 25 | 34 | 1.96          |
| 331496--331521 | 13          | 2           | 13             | 100             | 0              | 52    | 30 | 15 | 23 | 30 | 1.95          |
| 335026--335061 | 16          | 2.2         | 16             | 85              | 0              | 51    | 55 | 30 | 11 | 2  | 1.49          |
| 360577--360617 | 20          | 2           | 20             | 81              | 9              | 52    | 34 | 17 | 36 | 12 | 1.87          |
| 372618--372642 | 12          | 2.1         | 12             | 100             | 0              | 50    | 8  | 16 | 0  | 76 | 1.02          |
| 395312--395353 | 20          | 2.2         | 19             | 82              | 4              | 54    | 30 | 19 | 2  | 47 | 1.62          |

**Table S6.** Dispersed repeat sequences in the mitochondrial genome of *Punica granatum*

| <b>The repeat length of the first part</b> | <b>The starting site of the first part</b> | <b>Matching direction</b> | <b>The repeat length of the second part</b> | <b>The starting site of the second part</b> | <b>Interval distance of repeats</b> | <b>E-value</b> |
|--------------------------------------------|--------------------------------------------|---------------------------|---------------------------------------------|---------------------------------------------|-------------------------------------|----------------|
| 31296                                      | 1264                                       | F                         | 31296                                       | 96648                                       | 0                                   | 0.00E+00       |
| 10745                                      | 64384                                      | F                         | 10745                                       | 326006                                      | 0                                   | 0.00E+00       |
| 3726                                       | 3850                                       | F                         | 3726                                        | 229082                                      | 0                                   | 0.00E+00       |
| 3726                                       | 99234                                      | F                         | 3726                                        | 229082                                      | 0                                   | 0.00E+00       |
| 2073                                       | 75129                                      | P                         | 2073                                        | 402734                                      | 0                                   | 0.00E+00       |
| 318                                        | 41378                                      | P                         | 318                                         | 243624                                      | 0                                   | 1.62E-181      |
| 248                                        | 0                                          | P                         | 248                                         | 238602                                      | 0                                   | 2.25E-139      |
| 164                                        | 130214                                     | F                         | 164                                         | 290830                                      | 0                                   | 8.43E-89       |
| 125                                        | 57189                                      | P                         | 125                                         | 378907                                      | -2                                  | 1.78E-60       |
| 110                                        | 14286                                      | F                         | 110                                         | 308494                                      | 0                                   | 2.74E-56       |
| 110                                        | 109670                                     | F                         | 110                                         | 308494                                      | 0                                   | 2.74E-56       |
| 109                                        | 307530                                     | F                         | 109                                         | 377575                                      | -1                                  | 3.58E-53       |
| 114                                        | 243623                                     | P                         | 114                                         | 288645                                      | -3                                  | 6.94E-52       |
| 113                                        | 41583                                      | F                         | 113                                         | 288645                                      | -3                                  | 2.70E-51       |
| 101                                        | 307538                                     | F                         | 101                                         | 377583                                      | 0                                   | 7.17E-51       |
| 99                                         | 41597                                      | F                         | 99                                          | 288659                                      | -2                                  | 5.01E-45       |
| 102                                        | 57177                                      | P                         | 102                                         | 378942                                      | -3                                  | 8.31E-45       |
| 97                                         | 14559                                      | P                         | 97                                          | 86765                                       | -2                                  | 7.69E-44       |
| 97                                         | 86765                                      | P                         | 97                                          | 109943                                      | -2                                  | 7.69E-44       |
| 89                                         | 180030                                     | F                         | 89                                          | 268734                                      | 0                                   | 1.20E-43       |
| 88                                         | 237363                                     | F                         | 88                                          | 274435                                      | 0                                   | 4.81E-43       |
| 99                                         | 173397                                     | F                         | 99                                          | 292013                                      | -3                                  | 4.86E-43       |
| 91                                         | 41605                                      | F                         | 91                                          | 288667                                      | -1                                  | 2.05E-42       |
| 86                                         | 161653                                     | P                         | 86                                          | 224372                                      | -1                                  | 1.99E-39       |
| 89                                         | 191555                                     | F                         | 89                                          | 384630                                      | -2                                  | 4.24E-39       |
| 81                                         | 14575                                      | P                         | 81                                          | 86765                                       | 0                                   | 7.88E-39       |
| 84                                         | 84189                                      | P                         | 84                                          | 228114                                      | -1                                  | 3.10E-38       |
| 78                                         | 52268                                      | F                         | 78                                          | 287269                                      | 0                                   | 5.05E-37       |
| 79                                         | 130674                                     | P                         | 79                                          | 236284                                      | -1                                  | 2.99E-35       |
| 81                                         | 253821                                     | F                         | 81                                          | 344344                                      | -2                                  | 2.30E-34       |

|    |        |   |    |        |    |          |
|----|--------|---|----|--------|----|----------|
| 83 | 224263 | F | 83 | 376145 | -3 | 1.22E-33 |
| 72 | 41753  | F | 72 | 147693 | 0  | 2.07E-33 |
| 79 | 224273 | F | 79 | 376155 | -3 | 2.69E-31 |
| 77 | 136488 | P | 77 | 168525 | -3 | 3.99E-30 |
| 75 | 53964  | F | 75 | 148537 | -3 | 5.89E-29 |
| 75 | 130793 | F | 75 | 291856 | -3 | 5.89E-29 |
| 63 | 41633  | F | 63 | 288695 | 0  | 5.42E-28 |
| 69 | 208501 | F | 69 | 295130 | -2 | 2.79E-27 |
| 71 | 53947  | F | 71 | 148520 | -3 | 1.28E-26 |
| 60 | 140592 | P | 60 | 287361 | 0  | 3.47E-26 |
| 67 | 213757 | F | 67 | 215773 | -2 | 4.21E-26 |
| 70 | 6358   | F | 70 | 42853  | -3 | 4.89E-26 |
| 70 | 42853  | F | 70 | 101742 | -3 | 4.89E-26 |
| 70 | 42853  | F | 70 | 231590 | -3 | 4.89E-26 |
| 63 | 348971 | F | 63 | 378417 | -1 | 1.02E-25 |
| 59 | 52109  | P | 59 | 193901 | 0  | 1.39E-25 |
| 59 | 211752 | F | 59 | 343042 | 0  | 1.39E-25 |
| 62 | 136503 | P | 62 | 168525 | -1 | 4.03E-25 |
| 57 | 51063  | P | 57 | 74152  | 0  | 2.22E-24 |
| 57 | 51063  | P | 57 | 335774 | 0  | 2.22E-24 |
| 55 | 71981  | P | 55 | 207259 | 0  | 3.55E-23 |
| 55 | 207259 | P | 55 | 333603 | 0  | 3.55E-23 |
| 62 | 48949  | P | 62 | 75277  | -2 | 3.69E-23 |
| 62 | 48949  | F | 62 | 404597 | -2 | 3.69E-23 |
| 62 | 84264  | P | 62 | 227131 | -2 | 3.69E-23 |
| 65 | 6936   | F | 65 | 43427  | -3 | 3.99E-23 |
| 65 | 43427  | F | 65 | 102320 | -3 | 3.99E-23 |
| 65 | 43427  | F | 65 | 232168 | -3 | 3.99E-23 |
| 65 | 206726 | P | 65 | 376162 | -3 | 3.99E-23 |
| 54 | 39864  | F | 54 | 213622 | 0  | 1.42E-22 |
| 54 | 208516 | F | 54 | 295145 | 0  | 1.42E-22 |
| 57 | 192923 | P | 57 | 259177 | -1 | 3.79E-22 |
| 60 | 15965  | F | 60 | 288255 | -2 | 5.52E-22 |
| 60 | 111349 | F | 60 | 288255 | -2 | 5.52E-22 |

|    |        |   |    |        |    |          |
|----|--------|---|----|--------|----|----------|
| 53 | 84220  | P | 53 | 228114 | 0  | 5.68E-22 |
| 63 | 161551 | P | 63 | 224491 | -3 | 5.81E-22 |
| 62 | 161536 | P | 62 | 224507 | -3 | 2.21E-21 |
| 51 | 53822  | F | 51 | 148474 | 0  | 9.09E-21 |
| 50 | 92426  | P | 50 | 193789 | 0  | 3.64E-20 |
| 59 | 161449 | P | 59 | 224587 | -3 | 1.22E-19 |
| 52 | 317364 | F | 52 | 319489 | -1 | 3.54E-19 |
| 48 | 27372  | P | 48 | 204126 | 0  | 5.82E-19 |
| 48 | 122756 | P | 48 | 204126 | 0  | 5.82E-19 |
| 48 | 130705 | P | 48 | 236284 | 0  | 5.82E-19 |
| 51 | 224301 | F | 51 | 376183 | -1 | 1.39E-18 |
| 46 | 173465 | P | 46 | 301211 | 0  | 9.31E-18 |
| 49 | 50937  | P | 49 | 187852 | -1 | 2.14E-17 |
| 53 | 6392   | F | 53 | 42887  | -3 | 3.59E-16 |
| 53 | 42887  | F | 53 | 101776 | -3 | 3.59E-16 |
| 53 | 42887  | F | 53 | 231624 | -3 | 3.59E-16 |
| 53 | 161419 | P | 53 | 224623 | -3 | 3.59E-16 |
| 46 | 57268  | P | 46 | 378907 | -1 | 1.28E-15 |
| 49 | 243688 | P | 49 | 288645 | -2 | 1.54E-15 |
| 51 | 161692 | P | 51 | 376256 | -3 | 5.11E-15 |
| 48 | 6953   | F | 48 | 43444  | -2 | 5.91E-15 |
| 48 | 43444  | F | 48 | 102337 | -2 | 5.91E-15 |
| 48 | 43444  | F | 48 | 232185 | -2 | 5.91E-15 |
| 41 | 15355  | F | 41 | 75236  | 0  | 9.53E-15 |
| 41 | 15355  | P | 41 | 404659 | 0  | 9.53E-15 |
| 41 | 75236  | F | 41 | 110739 | 0  | 9.53E-15 |
| 41 | 110739 | P | 41 | 404659 | 0  | 9.53E-15 |
| 50 | 173482 | F | 50 | 292098 | -3 | 1.92E-14 |
| 44 | 10412  | P | 44 | 323308 | -1 | 1.97E-14 |
| 44 | 105796 | P | 44 | 323308 | -1 | 1.97E-14 |
| 44 | 206726 | P | 44 | 224301 | -1 | 1.97E-14 |
| 44 | 289968 | F | 44 | 349436 | -1 | 1.97E-14 |
| 47 | 65740  | P | 47 | 293847 | -2 | 2.26E-14 |
| 47 | 173327 | F | 47 | 287238 | -2 | 2.26E-14 |

|    |        |   |    |        |    |          |
|----|--------|---|----|--------|----|----------|
| 47 | 293847 | P | 47 | 327362 | -2 | 2.26E-14 |
| 40 | 51030  | F | 40 | 51896  | 0  | 3.81E-14 |
| 40 | 338012 | P | 40 | 385290 | 0  | 3.81E-14 |
| 49 | 1411   | P | 49 | 311024 | -3 | 7.23E-14 |
| 49 | 96795  | P | 49 | 311024 | -3 | 7.23E-14 |
| 49 | 161436 | P | 49 | 224610 | -3 | 7.23E-14 |
| 46 | 32558  | F | 46 | 128437 | -2 | 8.67E-14 |
| 39 | 228217 | F | 39 | 228325 | 0  | 1.52E-13 |
| 39 | 390323 | P | 39 | 397915 | 0  | 1.52E-13 |
| 48 | 25497  | F | 48 | 180030 | -3 | 2.72E-13 |
| 48 | 25497  | F | 48 | 268734 | -3 | 2.72E-13 |
| 48 | 120881 | F | 48 | 180030 | -3 | 2.72E-13 |
| 48 | 120881 | F | 48 | 268734 | -3 | 2.72E-13 |
| 45 | 1629   | P | 45 | 310812 | -2 | 3.32E-13 |
| 45 | 65569  | F | 45 | 72118  | -2 | 3.32E-13 |
| 45 | 65569  | F | 45 | 333740 | -2 | 3.32E-13 |
| 45 | 72118  | F | 45 | 327191 | -2 | 3.32E-13 |
| 45 | 97013  | P | 45 | 310812 | -2 | 3.32E-13 |
| 45 | 147647 | P | 45 | 372159 | -2 | 3.32E-13 |
| 45 | 327191 | F | 45 | 333740 | -2 | 3.32E-13 |
| 38 | 317378 | F | 38 | 319503 | 0  | 6.1E-13  |
| 47 | 75463  | P | 47 | 84858  | -3 | 1.02E-12 |
| 47 | 84858  | F | 47 | 404426 | -3 | 1.02E-12 |
| 41 | 84285  | P | 41 | 227131 | -1 | 1.17E-12 |
| 41 | 91088  | F | 41 | 173801 | -1 | 1.17E-12 |
| 44 | 41332  | P | 44 | 74171  | -2 | 1.27E-12 |
| 44 | 41332  | P | 44 | 335793 | -2 | 1.27E-12 |
| 44 | 365330 | P | 44 | 394333 | -2 | 1.27E-12 |
| 37 | 241279 | F | 37 | 315667 | 0  | 2.44E-12 |
| 46 | 206711 | P | 46 | 376196 | -3 | 3.81E-12 |
| 40 | 177650 | P | 40 | 364032 | -1 | 4.57E-12 |
| 36 | 51111  | F | 36 | 349027 | 0  | 9.76E-12 |
| 36 | 136529 | P | 36 | 168525 | 0  | 9.76E-12 |
| 36 | 139801 | F | 36 | 141511 | 0  | 9.76E-12 |

|    |        |   |    |        |    |          |
|----|--------|---|----|--------|----|----------|
| 36 | 242207 | P | 36 | 291939 | 0  | 9.76E-12 |
| 45 | 747    | P | 45 | 311676 | -3 | 1.43E-11 |
| 45 | 224374 | F | 45 | 376262 | -3 | 1.43E-11 |
| 39 | 149111 | F | 39 | 240289 | -1 | 1.78E-11 |
| 39 | 293855 | P | 39 | 327362 | -1 | 1.78E-11 |
| 35 | 51063  | P | 35 | 348988 | 0  | 3.9E-11  |
| 35 | 51063  | P | 35 | 378434 | 0  | 3.9E-11  |
| 35 | 57220  | P | 35 | 361836 | 0  | 3.9E-11  |
| 35 | 72016  | F | 35 | 308295 | 0  | 3.9E-11  |
| 35 | 74174  | F | 35 | 348988 | 0  | 3.9E-11  |
| 35 | 74174  | F | 35 | 378434 | 0  | 3.9E-11  |
| 35 | 90090  | F | 35 | 310236 | 0  | 3.9E-11  |
| 35 | 308295 | F | 35 | 333638 | 0  | 3.9E-11  |
| 35 | 335796 | F | 35 | 348988 | 0  | 3.9E-11  |
| 35 | 335796 | F | 35 | 378434 | 0  | 3.9E-11  |
| 35 | 361836 | F | 35 | 378966 | 0  | 3.9E-11  |
| 44 | 65460  | P | 44 | 207235 | -3 | 5.33E-11 |
| 44 | 207235 | P | 44 | 327082 | -3 | 5.33E-11 |
| 38 | 65721  | F | 38 | 287250 | -1 | 6.95E-11 |
| 38 | 228199 | F | 38 | 376847 | -1 | 6.95E-11 |
| 38 | 287250 | F | 38 | 327343 | -1 | 6.95E-11 |
| 38 | 288667 | F | 38 | 391474 | -1 | 6.95E-11 |
| 41 | 191641 | F | 41 | 384718 | -2 | 7.03E-11 |
| 41 | 226266 | F | 41 | 278368 | -2 | 7.03E-11 |
| 41 | 287035 | F | 41 | 341181 | -2 | 7.03E-11 |
| 34 | 57280  | P | 34 | 378907 | 0  | 1.56E-10 |
| 34 | 202595 | P | 34 | 354114 | 0  | 1.56E-10 |
| 34 | 351565 | F | 34 | 388361 | 0  | 1.56E-10 |
| 43 | 161473 | P | 43 | 224579 | -3 | 1.98E-10 |
| 43 | 173308 | F | 43 | 287219 | -3 | 1.98E-10 |
| 40 | 41603  | F | 40 | 391472 | -2 | 2.68E-10 |
| 40 | 243677 | P | 40 | 391472 | -2 | 2.68E-10 |
| 37 | 41662  | P | 37 | 143139 | -1 | 2.71E-10 |
| 37 | 74775  | P | 37 | 206607 | -1 | 2.71E-10 |



|    |        |   |    |        |    |          |
|----|--------|---|----|--------|----|----------|
| 37 | 147655 | P | 37 | 372159 | -1 | 2.71E-10 |
| 37 | 176581 | F | 37 | 211686 | -1 | 2.71E-10 |
| 37 | 206607 | P | 37 | 336397 | -1 | 2.71E-10 |
| 33 | 240904 | P | 33 | 391539 | 0  | 6.25E-10 |
| 42 | 173497 | F | 42 | 292113 | -3 | 7.39E-10 |
| 39 | 54000  | F | 39 | 148573 | -2 | 1.02E-09 |
| 39 | 185306 | P | 39 | 223822 | -2 | 1.02E-09 |
| 36 | 15989  | F | 36 | 288279 | -1 | 1.05E-09 |
| 36 | 111373 | F | 36 | 288279 | -1 | 1.05E-09 |
| 36 | 180996 | P | 36 | 247269 | -1 | 1.05E-09 |
| 41 | 73190  | F | 41 | 228778 | -3 | 2.74E-09 |
| 41 | 202657 | P | 41 | 303475 | -3 | 2.74E-09 |
| 41 | 228778 | F | 41 | 334812 | -3 | 2.74E-09 |
| 38 | 41338  | F | 38 | 51063  | -2 | 3.86E-09 |
| 35 | 288768 | F | 35 | 391623 | -1 | 4.1E-09  |
| 35 | 372810 | F | 35 | 372939 | -1 | 4.1E-09  |
| 31 | 32573  | F | 31 | 128452 | 0  | 9.99E-09 |
| 31 | 42537  | P | 31 | 310473 | 0  | 9.99E-09 |
| 31 | 60944  | F | 31 | 156777 | 0  | 9.99E-09 |
| 31 | 65523  | F | 31 | 72072  | 0  | 9.99E-09 |
| 31 | 65523  | F | 31 | 333694 | 0  | 9.99E-09 |
| 31 | 65721  | F | 31 | 173339 | 0  | 9.99E-09 |
| 31 | 72072  | F | 31 | 327145 | 0  | 9.99E-09 |
| 31 | 171591 | F | 31 | 261416 | 0  | 9.99E-09 |
| 31 | 173339 | F | 31 | 327343 | 0  | 9.99E-09 |
| 31 | 228150 | F | 31 | 228291 | 0  | 9.99E-09 |
| 31 | 288625 | F | 31 | 309271 | 0  | 9.99E-09 |
| 31 | 327145 | F | 31 | 333694 | 0  | 9.99E-09 |
| 37 | 25508  | F | 37 | 180041 | -2 | 1.46E-08 |
| 37 | 25508  | F | 37 | 268745 | -2 | 1.46E-08 |
| 37 | 51991  | P | 37 | 146001 | -2 | 1.46E-08 |
| 37 | 120892 | F | 37 | 180041 | -2 | 1.46E-08 |
| 37 | 120892 | F | 37 | 268745 | -2 | 1.46E-08 |
| 34 | 41338  | P | 34 | 348989 | -1 | 1.59E-08 |

|    |        |   |    |        |    |             |
|----|--------|---|----|--------|----|-------------|
| 34 | 41338  | P | 34 | 378435 | -1 | 1.59E-08    |
| 34 | 48977  | P | 34 | 75277  | -1 | 1.59E-08    |
| 34 | 48977  | F | 34 | 404625 | -1 | 1.59E-08    |
| 34 | 143142 | F | 34 | 243624 | -1 | 1.59E-08    |
| 34 | 143142 | P | 34 | 288724 | -1 | 1.59E-08    |
| 39 | 143152 | P | 39 | 380212 | -3 | 3.76E-08    |
| 30 | 14293  | P | 30 | 207140 | 0  | 0.00000004  |
| 30 | 41667  | P | 30 | 42488  | 0  | 0.00000004  |
| 30 | 51971  | F | 30 | 203742 | 0  | 0.00000004  |
| 30 | 74726  | P | 30 | 347531 | 0  | 0.00000004  |
| 30 | 109677 | P | 30 | 207140 | 0  | 0.00000004  |
| 30 | 143317 | P | 30 | 309275 | 0  | 0.00000004  |
| 30 | 207140 | P | 30 | 308501 | 0  | 0.00000004  |
| 30 | 288675 | F | 30 | 391482 | 0  | 0.00000004  |
| 30 | 336348 | P | 30 | 347531 | 0  | 0.00000004  |
| 33 | 37321  | P | 33 | 302983 | -1 | 6.18E-08    |
| 33 | 42641  | F | 33 | 131561 | -1 | 6.18E-08    |
| 33 | 147646 | F | 33 | 180973 | -1 | 6.18E-08    |
| 33 | 173397 | P | 33 | 199804 | -1 | 6.18E-08    |
| 33 | 199804 | P | 33 | 292013 | -1 | 6.18E-08    |
| 33 | 203729 | F | 33 | 391464 | -1 | 6.18E-08    |
| 33 | 253869 | F | 33 | 344392 | -1 | 6.18E-08    |
| 35 | 6245   | F | 35 | 42741  | -2 | 0.000000209 |
| 35 | 42741  | F | 35 | 101629 | -2 | 0.000000209 |
| 35 | 42741  | F | 35 | 231477 | -2 | 0.000000209 |
| 35 | 57464  | P | 35 | 348981 | -2 | 0.000000209 |
| 35 | 57464  | P | 35 | 378427 | -2 | 0.000000209 |
| 35 | 288605 | F | 35 | 397898 | -2 | 0.000000209 |
| 35 | 372865 | F | 35 | 372922 | -2 | 0.000000209 |
| 32 | 5810   | F | 32 | 41907  | -1 | 0.00000024  |
| 32 | 41907  | F | 32 | 101194 | -1 | 0.00000024  |
| 32 | 41907  | F | 32 | 231042 | -1 | 0.00000024  |
| 32 | 73199  | F | 32 | 228787 | -1 | 0.00000024  |
| 32 | 180974 | P | 32 | 372172 | -1 | 0.00000024  |

|    |        |   |    |        |    |             |
|----|--------|---|----|--------|----|-------------|
| 32 | 228787 | F | 32 | 334821 | -1 | 0.00000024  |
| 32 | 350335 | F | 32 | 359772 | -1 | 0.00000024  |
| 37 | 43727  | P | 37 | 72138  | -3 | 0.000000512 |
| 37 | 43727  | P | 37 | 333760 | -3 | 0.000000512 |
| 34 | 84871  | F | 34 | 404439 | -2 | 0.000000788 |
| 34 | 143298 | P | 34 | 247284 | -2 | 0.000000788 |
| 34 | 145238 | P | 34 | 377334 | -2 | 0.000000788 |
| 34 | 161584 | P | 34 | 224487 | -2 | 0.000000788 |
| 34 | 173505 | F | 34 | 292121 | -2 | 0.000000788 |
| 34 | 199803 | P | 34 | 259244 | -2 | 0.000000788 |
| 34 | 235762 | F | 34 | 251602 | -2 | 0.000000788 |
| 31 | 15392  | P | 31 | 206508 | -1 | 0.000000929 |
| 31 | 84206  | P | 31 | 228291 | -1 | 0.000000929 |
| 31 | 110776 | P | 31 | 206508 | -1 | 0.000000929 |
| 31 | 208564 | F | 31 | 295199 | -1 | 0.000000929 |
| 36 | 6081   | F | 36 | 42223  | -3 | 0.00000188  |
| 36 | 42223  | F | 36 | 101465 | -3 | 0.00000188  |
| 36 | 42223  | F | 36 | 231313 | -3 | 0.00000188  |
| 33 | 206758 | P | 33 | 376162 | -2 | 0.00000297  |
| 33 | 213982 | F | 33 | 238017 | -2 | 0.00000297  |
| 30 | 2876   | P | 30 | 309181 | -1 | 0.0000036   |
| 30 | 5912   | F | 30 | 42056  | -1 | 0.0000036   |
| 30 | 6791   | F | 30 | 43280  | -1 | 0.0000036   |
| 30 | 10128  | F | 30 | 42735  | -1 | 0.0000036   |
| 30 | 37348  | P | 30 | 302954 | -1 | 0.0000036   |
| 30 | 41346  | F | 30 | 51071  | -1 | 0.0000036   |
| 30 | 41346  | P | 30 | 74171  | -1 | 0.0000036   |
| 30 | 41346  | P | 30 | 335793 | -1 | 0.0000036   |
| 30 | 41613  | F | 30 | 391482 | -1 | 0.0000036   |
| 30 | 42056  | F | 30 | 101296 | -1 | 0.0000036   |
| 30 | 42056  | F | 30 | 231144 | -1 | 0.0000036   |
| 30 | 42468  | F | 30 | 203679 | -1 | 0.0000036   |
| 30 | 42488  | F | 30 | 143141 | -1 | 0.0000036   |
| 30 | 42488  | F | 30 | 243623 | -1 | 0.0000036   |

|    |        |   |    |        |    |           |
|----|--------|---|----|--------|----|-----------|
| 30 | 42488  | P | 30 | 288729 | -1 | 0.0000036 |
| 30 | 42735  | F | 30 | 105512 | -1 | 0.0000036 |
| 30 | 43280  | F | 30 | 102175 | -1 | 0.0000036 |
| 30 | 43280  | F | 30 | 232023 | -1 | 0.0000036 |
| 30 | 51027  | P | 30 | 361937 | -1 | 0.0000036 |
| 30 | 51941  | F | 30 | 203717 | -1 | 0.0000036 |
| 30 | 72014  | F | 30 | 213609 | -1 | 0.0000036 |
| 30 | 98260  | P | 30 | 309181 | -1 | 0.0000036 |
| 30 | 207249 | P | 30 | 327082 | -1 | 0.0000036 |
| 30 | 213609 | F | 30 | 333636 | -1 | 0.0000036 |
| 30 | 247266 | F | 30 | 341438 | -1 | 0.0000036 |
| 30 | 249638 | P | 30 | 261207 | -1 | 0.0000036 |
| 30 | 271183 | F | 30 | 373191 | -1 | 0.0000036 |
| 35 | 143311 | F | 35 | 390314 | -3 | 0.0000069 |
| 35 | 202917 | F | 35 | 248241 | -3 | 0.0000069 |
| 32 | 41412  | F | 32 | 58653  | -2 | 0.0000112 |
| 32 | 58653  | P | 32 | 243876 | -2 | 0.0000112 |
| 32 | 130627 | P | 32 | 236376 | -2 | 0.0000112 |
| 32 | 159791 | F | 32 | 199560 | -2 | 0.0000112 |
| 32 | 215609 | P | 32 | 306580 | -2 | 0.0000112 |
| 32 | 238327 | F | 32 | 372207 | -2 | 0.0000112 |
| 34 | 6518   | F | 34 | 43009  | -3 | 0.0000252 |
| 34 | 6527   | F | 34 | 43018  | -3 | 0.0000252 |
| 34 | 43009  | F | 34 | 101902 | -3 | 0.0000252 |
| 34 | 43009  | F | 34 | 231750 | -3 | 0.0000252 |
| 34 | 43018  | F | 34 | 101911 | -3 | 0.0000252 |
| 34 | 43018  | F | 34 | 231759 | -3 | 0.0000252 |
| 34 | 171678 | P | 34 | 368765 | -3 | 0.0000252 |
| 34 | 173396 | F | 34 | 259243 | -3 | 0.0000252 |
| 31 | 12735  | P | 31 | 303324 | -2 | 0.0000418 |
| 31 | 22384  | F | 31 | 321275 | -2 | 0.0000418 |
| 31 | 51070  | F | 31 | 57464  | -2 | 0.0000418 |
| 31 | 51896  | P | 31 | 361933 | -2 | 0.0000418 |
| 31 | 57464  | P | 31 | 74171  | -2 | 0.0000418 |

|    |        |   |    |        |    |           |
|----|--------|---|----|--------|----|-----------|
| 31 | 57464  | P | 31 | 335793 | -2 | 0.0000418 |
| 31 | 108119 | P | 31 | 303324 | -2 | 0.0000418 |
| 31 | 117768 | F | 31 | 321275 | -2 | 0.0000418 |
| 31 | 143151 | F | 31 | 243633 | -2 | 0.0000418 |
| 31 | 143151 | P | 31 | 288718 | -2 | 0.0000418 |
| 31 | 262740 | P | 31 | 378151 | -2 | 0.0000418 |
| 31 | 348522 | F | 31 | 367490 | -2 | 0.0000418 |
| 33 | 1439   | P | 33 | 311012 | -3 | 0.000092  |
| 33 | 6118   | F | 33 | 42260  | -3 | 0.000092  |
| 33 | 42260  | F | 33 | 101502 | -3 | 0.000092  |
| 33 | 42260  | F | 33 | 231350 | -3 | 0.000092  |
| 33 | 96823  | P | 33 | 311012 | -3 | 0.000092  |
| 33 | 143313 | P | 33 | 397928 | -3 | 0.000092  |
| 33 | 259244 | F | 33 | 292013 | -3 | 0.000092  |
| 33 | 292094 | P | 33 | 301211 | -3 | 0.000092  |
| 33 | 395771 | R | 33 | 395781 | -3 | 0.000092  |
| 30 | 32340  | P | 30 | 194105 | -2 | 0.000157  |
| 30 | 41823  | P | 30 | 203648 | -2 | 0.000157  |
| 30 | 44415  | P | 30 | 68812  | -2 | 0.000157  |
| 30 | 44415  | P | 30 | 330434 | -2 | 0.000157  |
| 30 | 48525  | P | 30 | 200774 | -2 | 0.000157  |
| 30 | 53429  | P | 30 | 350734 | -2 | 0.000157  |
| 30 | 54010  | F | 30 | 148583 | -2 | 0.000157  |
| 30 | 54043  | P | 30 | 379086 | -2 | 0.000157  |
| 30 | 54338  | P | 30 | 262737 | -2 | 0.000157  |
| 30 | 58615  | F | 30 | 92449  | -2 | 0.000157  |
| 30 | 127724 | P | 30 | 194105 | -2 | 0.000157  |
| 30 | 161486 | P | 30 | 224579 | -2 | 0.000157  |
| 30 | 161713 | P | 30 | 376256 | -2 | 0.000157  |
| 30 | 168122 | F | 30 | 193943 | -2 | 0.000157  |
| 30 | 202861 | P | 30 | 389610 | -2 | 0.000157  |
| 30 | 208739 | P | 30 | 363043 | -2 | 0.000157  |
| 30 | 213611 | F | 30 | 308295 | -2 | 0.000157  |
| 30 | 243688 | P | 30 | 391471 | -2 | 0.000157  |

|    |        |   |    |        |    |          |
|----|--------|---|----|--------|----|----------|
| 30 | 243914 | F | 30 | 391476 | -2 | 0.000157 |
| 30 | 314000 | P | 30 | 353729 | -2 | 0.000157 |
| 30 | 361904 | F | 30 | 372129 | -2 | 0.000157 |
| 32 | 41346  | F | 32 | 57465  | -3 | 0.000335 |
| 32 | 41346  | P | 32 | 348983 | -3 | 0.000335 |
| 32 | 41346  | P | 32 | 378429 | -3 | 0.000335 |
| 32 | 52304  | F | 32 | 341493 | -3 | 0.000335 |
| 32 | 84881  | F | 32 | 404449 | -3 | 0.000335 |
| 32 | 209452 | P | 32 | 221300 | -3 | 0.000335 |
| 32 | 287305 | F | 32 | 341493 | -3 | 0.000335 |
| 31 | 2891   | P | 31 | 309165 | -3 | 0.00121  |
| 31 | 3172   | P | 31 | 308753 | -3 | 0.00121  |
| 31 | 16000  | F | 31 | 288290 | -3 | 0.00121  |
| 31 | 41378  | P | 31 | 391473 | -3 | 0.00121  |
| 31 | 50351  | F | 31 | 286241 | -3 | 0.00121  |
| 31 | 53356  | F | 31 | 249888 | -3 | 0.00121  |
| 31 | 54730  | F | 31 | 250705 | -3 | 0.00121  |
| 31 | 57226  | F | 31 | 139247 | -3 | 0.00121  |
| 31 | 58667  | P | 31 | 370578 | -3 | 0.00121  |
| 31 | 68665  | F | 31 | 338030 | -3 | 0.00121  |
| 31 | 85590  | F | 31 | 321069 | -3 | 0.00121  |
| 31 | 98275  | P | 31 | 309165 | -3 | 0.00121  |
| 31 | 98556  | P | 31 | 308753 | -3 | 0.00121  |
| 31 | 111384 | F | 31 | 288290 | -3 | 0.00121  |
| 31 | 139247 | P | 31 | 378964 | -3 | 0.00121  |
| 31 | 144290 | F | 31 | 378320 | -3 | 0.00121  |
| 31 | 167987 | P | 31 | 255871 | -3 | 0.00121  |
| 31 | 180982 | P | 31 | 372165 | -3 | 0.00121  |
| 31 | 226279 | F | 31 | 278381 | -3 | 0.00121  |
| 31 | 292081 | P | 31 | 301226 | -3 | 0.00121  |
| 31 | 330287 | F | 31 | 338030 | -3 | 0.00121  |
| 30 | 920    | P | 30 | 311518 | -3 | 0.00438  |
| 30 | 2575   | P | 30 | 309512 | -3 | 0.00438  |
| 30 | 6109   | F | 30 | 42251  | -3 | 0.00438  |

|    |        |   |    |        |    |         |
|----|--------|---|----|--------|----|---------|
| 30 | 7234   | F | 30 | 43766  | -3 | 0.00438 |
| 30 | 10452  | P | 30 | 323281 | -3 | 0.00438 |
| 30 | 11555  | F | 30 | 12353  | -3 | 0.00438 |
| 30 | 11555  | F | 30 | 107737 | -3 | 0.00438 |
| 30 | 12353  | F | 30 | 106939 | -3 | 0.00438 |
| 30 | 24016  | P | 30 | 324719 | -3 | 0.00438 |
| 30 | 42251  | F | 30 | 101493 | -3 | 0.00438 |
| 30 | 42251  | F | 30 | 231341 | -3 | 0.00438 |
| 30 | 43766  | F | 30 | 102618 | -3 | 0.00438 |
| 30 | 43766  | F | 30 | 232466 | -3 | 0.00438 |
| 30 | 58615  | P | 30 | 193786 | -3 | 0.00438 |
| 30 | 58682  | F | 30 | 140194 | -3 | 0.00438 |
| 30 | 65612  | P | 30 | 193993 | -3 | 0.00438 |
| 30 | 97959  | P | 30 | 309512 | -3 | 0.00438 |
| 30 | 105836 | P | 30 | 323281 | -3 | 0.00438 |
| 30 | 106939 | F | 30 | 107737 | -3 | 0.00438 |
| 30 | 119400 | P | 30 | 324719 | -3 | 0.00438 |
| 30 | 139239 | P | 30 | 361843 | -3 | 0.00438 |
| 30 | 143307 | P | 30 | 203711 | -3 | 0.00438 |
| 30 | 143320 | P | 30 | 288626 | -3 | 0.00438 |
| 30 | 145904 | P | 30 | 287924 | -3 | 0.00438 |
| 30 | 163696 | F | 30 | 237380 | -3 | 0.00438 |
| 30 | 163696 | F | 30 | 274452 | -3 | 0.00438 |
| 30 | 193995 | P | 30 | 327232 | -3 | 0.00438 |
| 30 | 206712 | P | 30 | 224327 | -3 | 0.00438 |
| 30 | 224351 | F | 30 | 376240 | -3 | 0.00438 |
| 30 | 243914 | F | 30 | 288669 | -3 | 0.00438 |
| 30 | 353021 | F | 30 | 402428 | -3 | 0.00438 |
| 30 | 359532 | P | 30 | 361907 | -3 | 0.00438 |
| 30 | 370354 | F | 30 | 389045 | -3 | 0.00438 |

---

**Table S7.** The homologous DNA fragment in the mitochondrial genome of *Punica granatum*.

| Number | Identity % | Alignment Length | Mismatches | Gap Openings | Alignment start (chloroplast genome) | Alignment end (chloroplast genome) | Alignment start (mitochondrial genome) | Alignment end (mitochondrial genome) | E-value  | Bit Score | MTPT annotation                                          |
|--------|------------|------------------|------------|--------------|--------------------------------------|------------------------------------|----------------------------------------|--------------------------------------|----------|-----------|----------------------------------------------------------|
| 1      | 92.039     | 716              | 48         | 7            | 37593                                | 38303                              | 2.83E+05                               | 284104                               | 0.00E+00 | 998       | Complete ( <i>trnS</i> -UGA),<br>Partial ( <i>psbC</i> ) |
| 2      | 93.711     | 159              | 9          | 1            | 70783                                | 70941                              | 181715                                 | 181558                               | 2.1E-61  | 237       | Complete ( <i>trnW</i> -CCA)                             |
| 3      | 82.456     | 285              | 29         | 11           | 32154                                | 32422                              | 156103                                 | 155824                               | 3.5E-59  | 230       | Complete ( <i>trnD</i> -GUC)                             |
| 4      | 92.053     | 151              | 12         | 0            | 71021                                | 71171                              | 181501                                 | 181351                               | 3.48E-54 | 213       | Complete ( <i>trnP</i> -UGG)                             |
| 5      | 83.902     | 205              | 33         | 0            | 131048                               | 131252                             | 355828                                 | 356032                               | 3.51E-49 | 196       | Partial ( <i>ycf1</i> )                                  |
| 6      | 97.619     | 84               | 2          | 0            | 134567                               | 134650                             | 391047                                 | 390964                               | 1.29E-33 | 145       | Complete ( <i>trnN</i> -GUU)                             |
| 7      | 97.619     | 84               | 2          | 0            | 113010                               | 113093                             | 390964                                 | 391047                               | 1.29E-33 | 145       | Complete ( <i>trnN</i> -GUU)                             |
| 8      | 96.471     | 85               | 2          | 1            | 20                                   | 104                                | 241304                                 | 241221                               | 6.00E-32 | 139       | Complete ( <i>trnH</i> -GUG)                             |
| 9      | 93.827     | 81               | 4          | 1            | 133370                               | 133449                             | 71817                                  | 71737                                | 2.17E-26 | 121       | Partial ( <i>ycf1</i> )                                  |
| 10     | 93.827     | 81               | 4          | 1            | 114211                               | 114290                             | 71737                                  | 71817                                | 2.17E-26 | 121       | IGS( <i>trnN</i> -GUU, <i>ndhF</i> )                     |
| 11     | 93.827     | 81               | 4          | 1            | 133370                               | 133449                             | 333439                                 | 333359                               | 2.17E-26 | 121       | Partial ( <i>ycf1</i> )                                  |
| 12     | 93.827     | 81               | 4          | 1            | 114211                               | 114290                             | 333359                                 | 333439                               | 2.17E-26 | 121       | IGS( <i>trnN</i> -GUU, <i>ndhF</i> )                     |
| 13     | 92.405     | 79               | 5          | 1            | 56030                                | 56108                              | 244630                                 | 244707                               | 1.31E-23 | 111       | Complete ( <i>trnM</i> -CAU)                             |
| 14     | 100        | 28               | 0          | 0            | 44067                                | 44094                              | 90154                                  | 90127                                | 8.04E-06 | 52.8      | Partial ( <i>psaA</i> )                                  |



**Table S8.** Sequence collinearity of the mitochondrial genome of *Punica granatum* and related genera

| query      | database   | identity (%) | alignment | mismatch | gap | q. start | q. end | d. start | d. end | e-value  | score    |
|------------|------------|--------------|-----------|----------|-----|----------|--------|----------|--------|----------|----------|
| MZ934756.1 | MZ934757.1 | 99.996       | 102837    | 3        | 1   | 1        | 102836 | 1        | 102837 | 0        | 1.90E+05 |
| MZ934756.1 | MZ934757.1 | 99.996       | 91291     | 4        | 0   | 308018   | 399308 | 245204   | 336494 | 0        | 1.69E+05 |
| MZ934756.1 | MZ934757.1 | 99.99        | 70387     | 3        | 1   | 201759   | 272141 | 205923   | 135537 | 0        | 1.30E+05 |
| MZ934756.1 | MZ934757.1 | 99.997       | 67713     | 2        | 0   | 123050   | 190762 | 424392   | 356680 | 0        | 1.25E+05 |
| MZ934756.1 | MZ934757.1 | 100          | 32885     | 0        | 0   | 46165    | 79049  | 102831   | 135715 | 0        | 60728    |
| MZ934756.1 | MZ934757.1 | 99.992       | 24998     | 2        | 0   | 399135   | 424132 | 424219   | 449216 | 0        | 46152    |
| MZ934756.1 | MZ934757.1 | 99.99        | 19505     | 0        | 2   | 288309   | 307811 | 235082   | 215578 | 0        | 36007    |
| MZ934756.1 | MZ934757.1 | 99.994       | 17162     | 1        | 0   | 106062   | 123223 | 353482   | 336321 | 0        | 31687    |
| MZ934756.1 | MZ934757.1 | 99.973       | 15094     | 3        | 1   | 273628   | 288720 | 220605   | 205512 | 0        | 27850    |
| MZ934756.1 | MZ934757.1 | 99.974       | 7652      | 2        | 0   | 194519   | 202170 | 242322   | 234671 | 0        | 14120    |
| MZ934756.1 | MZ934757.1 | 99.618       | 3399      | 8        | 2   | 191429   | 194827 | 356572   | 353179 | 0        | 6200     |
| MZ934756.1 | MZ934757.1 | 99.625       | 3202      | 7        | 2   | 103169   | 106365 | 245215   | 242014 | 0        | 5842     |
| MZ934756.1 | MZ934757.1 | 100          | 1906      | 0        | 0   | 272135   | 274040 | 6018     | 4113   | 0        | 3520     |
| MZ934756.1 | MZ934757.1 | 99.779       | 906       | 2        | 0   | 1        | 906    | 356094   | 356999 | 0        | 1663     |
| MZ934756.1 | MZ934757.1 | 73.272       | 1201      | 237      | 58  | 46954    | 48111  | 40648    | 41807  | 9.70E-99 | 363      |
| MZ934756.1 | MZ934757.1 | 73.272       | 1201      | 237      | 60  | 40647    | 41806  | 46955    | 48112  | 9.70E-99 | 363      |
| MZ934756.1 | MZ934757.1 | 73.272       | 1201      | 237      | 60  | 40647    | 41806  | 103620   | 104777 | 9.70E-99 | 363      |
| MZ934757.1 | MZ934755.1 | 99.642       | 85726     | 110      | 56  | 250862   | 336494 | 298281   | 383902 | 0.00E+00 | 1.56E+05 |

|            |            |        |       |    |    |        |        |        |        |          |          |
|------------|------------|--------|-------|----|----|--------|--------|--------|--------|----------|----------|
| MZ934757.1 | MZ934755.1 | 99.685 | 79646 | 84 | 32 | 5      | 79596  | 1      | 79533  | 0.00E+00 | 1.46E+05 |
| MZ934757.1 | MZ934755.1 | 99.799 | 32886 | 13 | 9  | 102831 | 135704 | 46177  | 79021  | 0.00E+00 | 60314    |
| MZ934757.1 | MZ934755.1 | 99.708 | 32204 | 26 | 14 | 159078 | 191262 | 229854 | 197700 | 0.00E+00 | 58887    |
| MZ934757.1 | MZ934755.1 | 99.8   | 25017 | 24 | 9  | 424219 | 449216 | 383729 | 408738 | 0.00E+00 | 45897    |
| MZ934757.1 | MZ934755.1 | 99.658 | 22518 | 41 | 10 | 222710 | 245215 | 131055 | 108562 | 0.00E+00 | 41124    |
| MZ934757.1 | MZ934755.1 | 99.591 | 20067 | 31 | 13 | 82794  | 102837 | 88186  | 108224 | 0.00E+00 | 36555    |
| MZ934757.1 | MZ934755.1 | 99.561 | 19813 | 40 | 14 | 387569 | 407358 | 163954 | 183742 | 0.00E+00 | 36062    |
| MZ934757.1 | MZ934755.1 | 99.74  | 19643 | 20 | 11 | 356680 | 376310 | 260497 | 280120 | 0.00E+00 | 35962    |
| MZ934757.1 | MZ934755.1 | 99.804 | 14809 | 23 | 2  | 144015 | 158817 | 244650 | 229842 | 0.00E+00 | 27181    |
| MZ934757.1 | MZ934755.1 | 99.851 | 10075 | 9  | 1  | 205512 | 215586 | 131057 | 141125 | 0.00E+00 | 18517    |
| MZ934757.1 | MZ934755.1 | 99.386 | 8960  | 21 | 8  | 336347 | 345284 | 280392 | 289339 | 0.00E+00 | 16211    |
| MZ934757.1 | MZ934755.1 | 99.656 | 7263  | 9  | 5  | 349320 | 356572 | 252572 | 259828 | 0.00E+00 | 13260    |
| MZ934757.1 | MZ934755.1 | 99.822 | 6723  | 6  | 2  | 409766 | 416482 | 150950 | 157672 | 0.00E+00 | 12344    |
| MZ934757.1 | MZ934755.1 | 99.476 | 6484  | 14 | 3  | 416534 | 423013 | 157673 | 164140 | 0.00E+00 | 11767    |
| MZ934757.1 | MZ934755.1 | 98.245 | 6723  | 68 | 8  | 135710 | 142424 | 296862 | 290182 | 0.00E+00 | 11716    |
| MZ934757.1 | MZ934755.1 | 99.541 | 6103  | 3  | 3  | 245204 | 251306 | 190410 | 184333 | 0.00E+00 | 11092    |
| MZ934757.1 | MZ934755.1 | 99.617 | 5476  | 9  | 3  | 382287 | 387757 | 88194  | 82726  | 0.00E+00 | 9985     |
| MZ934757.1 | MZ934755.1 | 99.796 | 3915  | 6  | 2  | 345403 | 349315 | 248710 | 252624 | 0.00E+00 | 7184     |
| MZ934757.1 | MZ934755.1 | 99.932 | 2943  | 1  | 1  | 215578 | 218519 | 190617 | 193559 | 0.00E+00 | 5422     |
| MZ934757.1 | MZ934755.1 | 99.539 | 2602  | 6  | 1  | 407227 | 409828 | 144260 | 141665 | 0.00E+00 | 4734     |

|            |            |        |      |     |    |        |        |        |        |          |       |
|------------|------------|--------|------|-----|----|--------|--------|--------|--------|----------|-------|
| MZ934757.1 | MZ934755.1 | 99.313 | 1602 | 9   | 2  | 142425 | 144025 | 246947 | 245347 | 0.00E+00 | 2896  |
| MZ934757.1 | MZ934755.1 | 98.582 | 1410 | 6   | 3  | 422820 | 424228 | 82907  | 81511  | 0.00E+00 | 2481  |
| MZ934757.1 | MZ934755.1 | 99.667 | 902  | 3   | 0  | 356098 | 356999 | 1      | 902    | 0.00E+00 | 1650  |
| MZ934757.1 | MZ934755.1 | 92.391 | 828  | 54  | 3  | 141598 | 142424 | 247734 | 246915 | 0.00E+00 | 1171  |
| MZ934757.1 | MZ934755.1 | 97.842 | 556  | 10  | 2  | 142425 | 142979 | 290214 | 289660 | 0.00E+00 | 959   |
| MZ934757.1 | MZ934755.1 | 73.272 | 1201 | 237 | 58 | 46955  | 48112  | 40655  | 41814  | 9.35E-99 | 363   |
| MZ934757.1 | MZ934755.1 | 73.272 | 1201 | 237 | 58 | 103620 | 104777 | 40655  | 41814  | 9.35E-99 | 363   |
| MZ934757.1 | MZ934755.1 | 73.272 | 1201 | 237 | 60 | 40648  | 41807  | 46966  | 48123  | 9.35E-99 | 363   |
| MZ934755.1 | mtDNA      | 95.246 | 7594 | 217 | 55 | 401189 | 408721 | 355077 | 347567 | 0.00E+00 | 11891 |
| MZ934755.1 | mtDNA      | 93.39  | 5174 | 183 | 62 | 224490 | 229543 | 393490 | 388356 | 0.00E+00 | 7513  |
| MZ934755.1 | mtDNA      | 94.58  | 4889 | 180 | 34 | 254998 | 259828 | 53873  | 49012  | 0.00E+00 | 7481  |
| MZ934755.1 | mtDNA      | 95.785 | 4555 | 133 | 30 | 101425 | 105947 | 263439 | 258912 | 0.00E+00 | 7293  |
| MZ934755.1 | mtDNA      | 98.395 | 3240 | 39  | 4  | 74979  | 78209  | 15232  | 18467  | 0.00E+00 | 5683  |
| MZ934755.1 | mtDNA      | 98.395 | 3240 | 39  | 4  | 74979  | 78209  | 110616 | 113851 | 0.00E+00 | 5683  |
| MZ934755.1 | mtDNA      | 96.583 | 3278 | 81  | 16 | 373501 | 376758 | 25844  | 29110  | 0.00E+00 | 5404  |
| MZ934755.1 | mtDNA      | 96.583 | 3278 | 81  | 16 | 373501 | 376758 | 121228 | 124494 | 0.00E+00 | 5404  |
| MZ934755.1 | mtDNA      | 92.276 | 3651 | 160 | 48 | 32748  | 36319  | 364673 | 361066 | 0.00E+00 | 5068  |
| MZ934755.1 | mtDNA      | 96.004 | 3103 | 63  | 20 | 270558 | 273616 | 150255 | 153340 | 0.00E+00 | 4987  |
| MZ934755.1 | mtDNA      | 95.174 | 3170 | 106 | 17 | 230151 | 233292 | 388368 | 385218 | 0.00E+00 | 4963  |
| MZ934755.1 | mtDNA      | 96.301 | 3001 | 74  | 15 | 134781 | 137759 | 205822 | 202837 | 0.00E+00 | 4892  |

|            |       |        |      |    |    |        |        |        |        |          |      |
|------------|-------|--------|------|----|----|--------|--------|--------|--------|----------|------|
| MZ934755.1 | mtDNA | 96.289 | 2964 | 90 | 11 | 265236 | 268191 | 144774 | 147725 | 0.00E+00 | 4846 |
| MZ934755.1 | mtDNA | 95.353 | 2690 | 78 | 23 | 211057 | 213716 | 291466 | 288794 | 0.00E+00 | 4231 |
| MZ934755.1 | mtDNA | 96.694 | 2420 | 61 | 8  | 6318   | 8720   | 248924 | 251341 | 0.00E+00 | 4008 |
| MZ934755.1 | mtDNA | 92.846 | 2544 | 96 | 27 | 221699 | 224194 | 396542 | 394037 | 0.00E+00 | 3611 |
| MZ934755.1 | mtDNA | 94.39  | 2353 | 52 | 30 | 71770  | 74074  | 44126  | 41806  | 0.00E+00 | 3541 |
| MZ934755.1 | mtDNA | 96.834 | 2116 | 20 | 6  | 187660 | 189739 | 2255   | 151    | 0.00E+00 | 3493 |
| MZ934755.1 | mtDNA | 95.21  | 2171 | 66 | 21 | 174517 | 176659 | 280480 | 282640 | 0.00E+00 | 3398 |
| MZ934755.1 | mtDNA | 98.175 | 1808 | 29 | 3  | 201085 | 202892 | 161936 | 163739 | 0.00E+00 | 3153 |
| MZ934755.1 | mtDNA | 98.434 | 1660 | 23 | 2  | 131461 | 133120 | 336412 | 338068 | 0.00E+00 | 2918 |
| MZ934755.1 | mtDNA | 95.128 | 1868 | 57 | 11 | 214355 | 216203 | 288135 | 286283 | 0.00E+00 | 2915 |
| MZ934755.1 | mtDNA | 93.491 | 1813 | 96 | 12 | 384926 | 386735 | 139240 | 141033 | 0.00E+00 | 2675 |
| MZ934755.1 | mtDNA | 96.056 | 1648 | 54 | 9  | 112470 | 114115 | 403750 | 402112 | 0.00E+00 | 2673 |
| MZ934755.1 | mtDNA | 99.43  | 1403 | 8  | 0  | 52916  | 54318  | 310582 | 311984 | 0.00E+00 | 2547 |
| MZ934755.1 | mtDNA | 92.448 | 1814 | 73 | 32 | 336675 | 338459 | 59777  | 57999  | 0.00E+00 | 2532 |
| MZ934755.1 | mtDNA | 95.688 | 1577 | 53 | 4  | 216374 | 217936 | 285939 | 284364 | 0.00E+00 | 2521 |
| MZ934755.1 | mtDNA | 95.548 | 1550 | 66 | 2  | 352100 | 353649 | 127843 | 129389 | 0.00E+00 | 2477 |
| MZ934755.1 | mtDNA | 95.814 | 1529 | 49 | 8  | 180860 | 182377 | 228202 | 226678 | 0.00E+00 | 2455 |
| MZ934755.1 | mtDNA | 94.161 | 1610 | 59 | 11 | 286309 | 287907 | 235584 | 233999 | 0.00E+00 | 2420 |
| MZ934755.1 | mtDNA | 98.397 | 1372 | 11 | 5  | 51527  | 52893  | 308997 | 310362 | 0.00E+00 | 2401 |
| MZ934755.1 | mtDNA | 94.181 | 1581 | 60 | 9  | 178289 | 179849 | 277931 | 279499 | 0.00E+00 | 2381 |

|            |       |        |      |    |    |        |        |        |        |          |      |
|------------|-------|--------|------|----|----|--------|--------|--------|--------|----------|------|
| MZ934755.1 | mtDNA | 93.989 | 1597 | 38 | 12 | 287985 | 289542 | 234003 | 232426 | 0.00E+00 | 2364 |
| MZ934755.1 | mtDNA | 95.31  | 1450 | 35 | 17 | 269043 | 270475 | 148617 | 150050 | 0.00E+00 | 2270 |
| MZ934755.1 | mtDNA | 91.63  | 1577 | 88 | 19 | 18599  | 20156  | 240478 | 242029 | 0.00E+00 | 2141 |
| MZ934755.1 | mtDNA | 92.603 | 1433 | 61 | 14 | 116417 | 117804 | 191630 | 193062 | 0.00E+00 | 2017 |
| MZ934755.1 | mtDNA | 91.734 | 1476 | 68 | 18 | 17126  | 18578  | 239043 | 240487 | 0.00E+00 | 2001 |
| MZ934755.1 | mtDNA | 98.765 | 1053 | 13 | 0  | 393775 | 394827 | 6693   | 5641   | 0.00E+00 | 1873 |
| MZ934755.1 | mtDNA | 98.765 | 1053 | 13 | 0  | 393775 | 394827 | 102077 | 101025 | 0.00E+00 | 1873 |
| MZ934755.1 | mtDNA | 94.481 | 1232 | 41 | 9  | 390943 | 392156 | 180035 | 181257 | 0.00E+00 | 1873 |
| MZ934755.1 | mtDNA | 98.765 | 1053 | 13 | 0  | 393775 | 394827 | 231925 | 230873 | 0.00E+00 | 1873 |
| MZ934755.1 | mtDNA | 92.923 | 1201 | 54 | 11 | 20602  | 21787  | 242230 | 243414 | 0.00E+00 | 1718 |
| MZ934755.1 | mtDNA | 96.949 | 1016 | 30 | 1  | 112470 | 113484 | 76187  | 77202  | 0.00E+00 | 1703 |
| MZ934755.1 | mtDNA | 96.872 | 991  | 6  | 2  | 187660 | 188625 | 97639  | 96649  | 0.00E+00 | 1635 |
| MZ934755.1 | mtDNA | 95.866 | 1016 | 27 | 6  | 220703 | 221709 | 397574 | 396565 | 0.00E+00 | 1629 |
| MZ934755.1 | mtDNA | 96.829 | 946  | 19 | 1  | 156552 | 157497 | 198805 | 199739 | 0.00E+00 | 1570 |
| MZ934755.1 | mtDNA | 93.939 | 1056 | 35 | 12 | 264168 | 265202 | 143601 | 144648 | 0.00E+00 | 1568 |
| MZ934755.1 | mtDNA | 95.825 | 958  | 29 | 4  | 383793 | 384749 | 138286 | 139233 | 0.00E+00 | 1537 |
| MZ934755.1 | mtDNA | 95.638 | 894  | 36 | 1  | 1      | 894    | 49486  | 48596  | 0.00E+00 | 1432 |
| MZ934755.1 | mtDNA | 89.379 | 1111 | 61 | 15 | 253939 | 255014 | 55024  | 53936  | 0.00E+00 | 1345 |
| MZ934755.1 | mtDNA | 96.509 | 802  | 26 | 2  | 366535 | 367334 | 269661 | 268860 | 0.00E+00 | 1325 |
| MZ934755.1 | mtDNA | 96.382 | 774  | 16 | 6  | 253163 | 253924 | 235717 | 236490 | 0.00E+00 | 1264 |

|            |       |        |     |    |    |        |        |        |        |           |      |
|------------|-------|--------|-----|----|----|--------|--------|--------|--------|-----------|------|
| MZ934755.1 | mtDNA | 92.713 | 892 | 33 | 11 | 182813 | 183693 | 226686 | 225816 | 0.00E+00  | 1258 |
| MZ934755.1 | mtDNA | 94.395 | 785 | 22 | 6  | 22301  | 23085  | 244058 | 244820 | 0.00E+00  | 1186 |
| MZ934755.1 | mtDNA | 91.249 | 857 | 51 | 16 | 123119 | 123962 | 238460 | 237615 | 0.00E+00  | 1146 |
| MZ934755.1 | mtDNA | 92.067 | 832 | 37 | 13 | 204253 | 205078 | 164765 | 165573 | 0.00E+00  | 1144 |
| MZ934755.1 | mtDNA | 94.694 | 735 | 37 | 2  | 298688 | 299420 | 376231 | 376965 | 0.00E+00  | 1140 |
| MZ934755.1 | mtDNA | 93.817 | 744 | 32 | 4  | 268258 | 268987 | 147746 | 148489 | 0.00E+00  | 1107 |
| MZ934755.1 | mtDNA | 97.756 | 624 | 10 | 1  | 197089 | 197712 | 2389   | 3008   | 0.00E+00  | 1072 |
| MZ934755.1 | mtDNA | 97.756 | 624 | 10 | 1  | 197089 | 197712 | 97773  | 98392  | 0.00E+00  | 1072 |
| MZ934755.1 | mtDNA | 95.289 | 658 | 12 | 8  | 335706 | 336354 | 60415  | 59768  | 0.00E+00  | 1026 |
| MZ934755.1 | mtDNA | 96.053 | 608 | 24 | 0  | 308863 | 309470 | 189321 | 188714 | 0.00E+00  | 990  |
| MZ934755.1 | mtDNA | 90.959 | 730 | 50 | 5  | 325221 | 325945 | 372493 | 373211 | 0.00E+00  | 968  |
| MZ934755.1 | mtDNA | 92.388 | 670 | 22 | 4  | 203034 | 203674 | 163732 | 164401 | 0.00E+00  | 928  |
| MZ934755.1 | mtDNA | 95.304 | 575 | 27 | 0  | 281290 | 281864 | 225801 | 225227 | 0.00E+00  | 913  |
| MZ934755.1 | mtDNA | 91.145 | 655 | 33 | 9  | 274209 | 274863 | 153684 | 154313 | 0.00E+00  | 865  |
| MZ934755.1 | mtDNA | 90.923 | 661 | 24 | 17 | 380290 | 380949 | 172607 | 173232 | 0.00E+00  | 856  |
| MZ934755.1 | mtDNA | 91.681 | 589 | 40 | 6  | 118189 | 118777 | 193132 | 193711 | 0.00E+00  | 808  |
| MZ934755.1 | mtDNA | 90.302 | 629 | 40 | 17 | 50841  | 51465  | 308363 | 308974 | 0.00E+00  | 804  |
| MZ934755.1 | mtDNA | 92.74  | 551 | 22 | 5  | 213802 | 214334 | 288678 | 288128 | 0.00E+00  | 780  |
| MZ934755.1 | mtDNA | 91.124 | 507 | 30 | 3  | 186154 | 186646 | 306268 | 305763 | 0.00E+00  | 673  |
| MZ934755.1 | mtDNA | 88.65  | 511 | 38 | 13 | 392215 | 392709 | 181254 | 181760 | 1.27E-171 | 604  |

|            |            |        |      |     |    |        |        |        |        |          |      |
|------------|------------|--------|------|-----|----|--------|--------|--------|--------|----------|------|
| MZ934755.1 | mtDNA      | 74.128 | 889  | 175 | 41 | 72367  | 73225  | 7059   | 6196   | 6.65E-85 | 316  |
| MZ934755.1 | mtDNA      | 74.128 | 889  | 175 | 41 | 72367  | 73225  | 102443 | 101580 | 6.65E-85 | 316  |
| MZ934755.1 | mtDNA      | 74.128 | 889  | 175 | 41 | 72367  | 73225  | 232291 | 231428 | 6.65E-85 | 316  |
| mtDNA      | NC035616.1 | 97.831 | 3411 | 33  | 14 | 2238   | 5642   | 238843 | 242218 | 0.00E+00 | 5851 |
| mtDNA      | NC035616.1 | 97.831 | 3411 | 33  | 14 | 97622  | 101026 | 238843 | 242218 | 0.00E+00 | 5851 |
| mtDNA      | NC035616.1 | 97.729 | 2818 | 20  | 16 | 149225 | 152004 | 289398 | 292209 | 0.00E+00 | 4809 |
| mtDNA      | NC035616.1 | 98.566 | 2719 | 17  | 9  | 348992 | 351702 | 163704 | 166408 | 0.00E+00 | 4785 |
| mtDNA      | NC035616.1 | 98.504 | 2607 | 30  | 3  | 248827 | 251433 | 229032 | 226435 | 0.00E+00 | 4590 |
| mtDNA      | NC035616.1 | 97.549 | 2693 | 21  | 17 | 388210 | 390883 | 304091 | 301425 | 0.00E+00 | 4566 |
| mtDNA      | NC035616.1 | 99.035 | 2384 | 20  | 3  | 259672 | 262054 | 230451 | 232832 | 0.00E+00 | 4272 |
| mtDNA      | NC035616.1 | 97.927 | 2460 | 25  | 7  | 231560 | 234003 | 333948 | 331499 | 0.00E+00 | 4237 |
| mtDNA      | NC035616.1 | 98.771 | 2279 | 23  | 3  | 335800 | 338073 | 125906 | 128184 | 0.00E+00 | 4048 |
| mtDNA      | NC035616.1 | 99.243 | 2245 | 10  | 3  | 16384  | 18626  | 118011 | 120250 | 0.00E+00 | 4045 |
| mtDNA      | NC035616.1 | 99.243 | 2245 | 10  | 3  | 111768 | 114010 | 118011 | 120250 | 0.00E+00 | 4045 |
| mtDNA      | NC035616.1 | 97.427 | 2371 | 23  | 9  | 288648 | 290989 | 66357  | 68718  | 0.00E+00 | 4006 |
| mtDNA      | NC035616.1 | 98.763 | 2263 | 7   | 8  | 41727  | 43974  | 245990 | 243734 | 0.00E+00 | 4004 |
| mtDNA      | NC035616.1 | 99.005 | 2212 | 16  | 2  | 375460 | 377670 | 87793  | 89999  | 0.00E+00 | 3958 |
| mtDNA      | NC035616.1 | 98.889 | 1891 | 9   | 5  | 286609 | 288495 | 64247  | 66129  | 0.00E+00 | 3365 |
| mtDNA      | NC035616.1 | 95.632 | 2106 | 69  | 15 | 127791 | 129887 | 149770 | 147679 | 0.00E+00 | 3358 |
| mtDNA      | NC035616.1 | 96.529 | 1988 | 30  | 14 | 161890 | 163852 | 237446 | 235473 | 0.00E+00 | 3253 |

|       |            |        |      |    |    |        |        |        |        |          |      |
|-------|------------|--------|------|----|----|--------|--------|--------|--------|----------|------|
| mtDNA | NC035616.1 | 98.738 | 1822 | 6  | 4  | 14541  | 16362  | 116149 | 117953 | 0.00E+00 | 3221 |
| mtDNA | NC035616.1 | 98.738 | 1822 | 6  | 4  | 109925 | 111746 | 116149 | 117953 | 0.00E+00 | 3221 |
| mtDNA | NC035616.1 | 98.244 | 1765 | 17 | 3  | 402028 | 403787 | 29713  | 31468  | 0.00E+00 | 3075 |
| mtDNA | NC035616.1 | 99.009 | 1715 | 6  | 3  | 386486 | 388194 | 305847 | 304138 | 0.00E+00 | 3062 |
| mtDNA | NC035616.1 | 99.405 | 1681 | 10 | 0  | 310412 | 312092 | 262051 | 260371 | 0.00E+00 | 3049 |
| mtDNA | NC035616.1 | 97.051 | 1797 | 24 | 11 | 229083 | 230874 | 240446 | 242218 | 0.00E+00 | 2998 |
| mtDNA | NC035616.1 | 96.44  | 1798 | 28 | 17 | 180002 | 181771 | 10975  | 9186   | 0.00E+00 | 2933 |
| mtDNA | NC035616.1 | 98.826 | 1619 | 9  | 4  | 191461 | 193079 | 256667 | 258275 | 0.00E+00 | 2876 |
| mtDNA | NC035616.1 | 98.373 | 1598 | 13 | 6  | 280349 | 281945 | 189489 | 187904 | 0.00E+00 | 2795 |
| mtDNA | NC035616.1 | 98.791 | 1572 | 13 | 2  | 172817 | 174387 | 210243 | 211809 | 0.00E+00 | 2793 |
| mtDNA | NC035616.1 | 97.263 | 1498 | 18 | 5  | 58732  | 60225  | 299786 | 298308 | 0.00E+00 | 2518 |
| mtDNA | NC035616.1 | 96.308 | 1544 | 20 | 11 | 378438 | 379963 | 90857  | 92381  | 0.00E+00 | 2501 |
| mtDNA | NC035616.1 | 95.669 | 1547 | 40 | 18 | 49563  | 51095  | 25445  | 23912  | 0.00E+00 | 2460 |
| mtDNA | NC035616.1 | 99.554 | 1346 | 5  | 1  | 234274 | 235619 | 726    | 2070   | 0.00E+00 | 2451 |
| mtDNA | NC035616.1 | 95.382 | 1559 | 20 | 14 | 369917 | 371435 | 329583 | 331129 | 0.00E+00 | 2433 |
| mtDNA | NC035616.1 | 97.604 | 1419 | 23 | 5  | 359100 | 360517 | 322112 | 323520 | 0.00E+00 | 2422 |
| mtDNA | NC035616.1 | 99.171 | 1327 | 9  | 1  | 152016 | 153342 | 292258 | 293582 | 0.00E+00 | 2388 |
| mtDNA | NC035616.1 | 99.542 | 1310 | 6  | 0  | 198452 | 199761 | 129802 | 128493 | 0.00E+00 | 2386 |
| mtDNA | NC035616.1 | 99.233 | 1303 | 5  | 1  | 203050 | 204352 | 95016  | 96313  | 0.00E+00 | 2346 |
| mtDNA | NC035616.1 | 99.61  | 1283 | 5  | 0  | 225172 | 226454 | 131384 | 132666 | 0.00E+00 | 2342 |



|       |            |        |      |    |    |        |        |        |        |          |      |
|-------|------------|--------|------|----|----|--------|--------|--------|--------|----------|------|
| mtDNA | NC035616.1 | 98.824 | 1275 | 12 | 2  | 226928 | 228202 | 134099 | 135370 | 0.00E+00 | 2268 |
| mtDNA | NC035616.1 | 99.351 | 1233 | 3  | 1  | 101712 | 102944 | 333948 | 332721 | 0.00E+00 | 2228 |
| mtDNA | NC035616.1 | 99.351 | 1233 | 3  | 1  | 6328   | 7560   | 333948 | 332721 | 0.00E+00 | 2228 |
| mtDNA | NC035616.1 | 99.748 | 1191 | 3  | 0  | 52632  | 53822  | 22228  | 21038  | 0.00E+00 | 2183 |
| mtDNA | NC035616.1 | 97.408 | 1273 | 16 | 5  | 352993 | 354264 | 167810 | 169066 | 0.00E+00 | 2152 |
| mtDNA | NC035616.1 | 99.911 | 1122 | 1  | 0  | 309282 | 310403 | 263221 | 262100 | 0.00E+00 | 2067 |
| mtDNA | NC035616.1 | 99.123 | 1140 | 9  | 1  | 367473 | 368612 | 326761 | 327899 | 0.00E+00 | 2049 |
| mtDNA | NC035616.1 | 99.638 | 1104 | 4  | 0  | 139203 | 140306 | 58199  | 59302  | 0.00E+00 | 2017 |
| mtDNA | NC035616.1 | 99.724 | 1087 | 3  | 0  | 396489 | 397575 | 322060 | 320974 | 0.00E+00 | 1991 |
| mtDNA | NC035616.1 | 98.048 | 1127 | 13 | 8  | 188603 | 189728 | 254378 | 255496 | 0.00E+00 | 1951 |
| mtDNA | NC035616.1 | 97.548 | 1101 | 2  | 3  | 239028 | 240107 | 253422 | 252326 | 0.00E+00 | 1860 |
| mtDNA | NC035616.1 | 98.575 | 1053 | 11 | 1  | 76150  | 77202  | 31468  | 30420  | 0.00E+00 | 1858 |
| mtDNA | NC035616.1 | 98     | 1050 | 7  | 7  | 51103  | 52143  | 23838  | 22794  | 0.00E+00 | 1810 |
| mtDNA | NC035616.1 | 99.494 | 989  | 5  | 0  | 160400 | 161388 | 122622 | 121634 | 0.00E+00 | 1799 |
| mtDNA | NC035616.1 | 96.445 | 1069 | 17 | 9  | 57661  | 58719  | 300889 | 299832 | 0.00E+00 | 1744 |
| mtDNA | NC035616.1 | 99.358 | 934  | 6  | 0  | 268735 | 269668 | 191464 | 190531 | 0.00E+00 | 1692 |
| mtDNA | NC035616.1 | 97.951 | 976  | 5  | 5  | 372493 | 373454 | 42410  | 41436  | 0.00E+00 | 1677 |
| mtDNA | NC035616.1 | 99.564 | 918  | 4  | 0  | 352062 | 352979 | 166850 | 167767 | 0.00E+00 | 1674 |
| mtDNA | NC035616.1 | 98.015 | 957  | 14 | 3  | 74178  | 75129  | 125906 | 126862 | 0.00E+00 | 1657 |
| mtDNA | NC035616.1 | 96.256 | 1015 | 17 | 11 | 54538  | 55531  | 20237  | 19223  | 0.00E+00 | 1644 |

|       |            |        |     |    |    |        |        |        |        |          |      |
|-------|------------|--------|-----|----|----|--------|--------|--------|--------|----------|------|
| mtDNA | NC035616.1 | 98.06  | 928 | 8  | 2  | 244291 | 245214 | 249031 | 248110 | 0.00E+00 | 1605 |
| mtDNA | NC035616.1 | 99.419 | 861 | 5  | 0  | 83566  | 84426  | 298029 | 297169 | 0.00E+00 | 1563 |
| mtDNA | NC035616.1 | 99.877 | 816 | 1  | 0  | 73355  | 74170  | 125017 | 125832 | 0.00E+00 | 1502 |
| mtDNA | NC035616.1 | 99.877 | 816 | 1  | 0  | 334977 | 335792 | 125017 | 125832 | 0.00E+00 | 1502 |
| mtDNA | NC035616.1 | 98.472 | 851 | 7  | 6  | 48594  | 49443  | 26255  | 25410  | 0.00E+00 | 1495 |
| mtDNA | NC035616.1 | 97.9   | 857 | 15 | 1  | 235626 | 236479 | 2119   | 2975   | 0.00E+00 | 1480 |
| mtDNA | NC035616.1 | 99.873 | 786 | 1  | 0  | 122713 | 123498 | 181217 | 180432 | 0.00E+00 | 1447 |
| mtDNA | NC035616.1 | 99.873 | 786 | 1  | 0  | 27329  | 28114  | 181217 | 180432 | 0.00E+00 | 1447 |
| mtDNA | NC035616.1 | 99.747 | 790 | 1  | 1  | 143504 | 144292 | 285731 | 286520 | 0.00E+00 | 1447 |
| mtDNA | NC035616.1 | 98.415 | 820 | 9  | 2  | 140556 | 141375 | 59673  | 60488  | 0.00E+00 | 1439 |
| mtDNA | NC035616.1 | 98.515 | 808 | 10 | 1  | 284913 | 285720 | 62438  | 63243  | 0.00E+00 | 1424 |
| mtDNA | NC035616.1 | 98.753 | 802 | 6  | 4  | 145258 | 146056 | 287265 | 288065 | 0.00E+00 | 1423 |
| mtDNA | NC035616.1 | 98.731 | 788 | 10 | 0  | 262066 | 262853 | 232916 | 233703 | 0.00E+00 | 1400 |
| mtDNA | NC035616.1 | 94.574 | 903 | 38 | 9  | 40426  | 41321  | 247226 | 246328 | 0.00E+00 | 1386 |
| mtDNA | NC035616.1 | 99.332 | 748 | 4  | 1  | 141384 | 142130 | 60535  | 61282  | 0.00E+00 | 1352 |
| mtDNA | NC035616.1 | 98.935 | 751 | 3  | 2  | 285738 | 286488 | 63303  | 64048  | 0.00E+00 | 1338 |
| mtDNA | NC035616.1 | 96.556 | 813 | 6  | 5  | 243419 | 244226 | 249965 | 249170 | 0.00E+00 | 1327 |
| mtDNA | NC035616.1 | 94.263 | 889 | 9  | 10 | 369048 | 369904 | 328448 | 329326 | 0.00E+00 | 1321 |
| mtDNA | NC035616.1 | 98.643 | 737 | 3  | 1  | 146060 | 146796 | 288121 | 288850 | 0.00E+00 | 1299 |
| mtDNA | NC035616.1 | 95.198 | 833 | 10 | 7  | 153907 | 154731 | 294487 | 295297 | 0.00E+00 | 1290 |

|       |            |        |     |    |   |        |        |        |        |          |      |
|-------|------------|--------|-----|----|---|--------|--------|--------|--------|----------|------|
| mtDNA | NC035616.1 | 97.538 | 731 | 11 | 3 | 130396 | 131125 | 68783  | 69507  | 0.00E+00 | 1243 |
| mtDNA | NC035616.1 | 98.31  | 710 | 8  | 1 | 313398 | 314107 | 61336  | 62041  | 0.00E+00 | 1242 |
| mtDNA | NC035616.1 | 98.849 | 695 | 7  | 1 | 53834  | 54527  | 20990  | 20296  | 0.00E+00 | 1238 |
| mtDNA | NC035616.1 | 96.913 | 745 | 5  | 3 | 204365 | 205109 | 96359  | 97085  | 0.00E+00 | 1232 |
| mtDNA | NC035616.1 | 99.12  | 682 | 3  | 2 | 230881 | 231559 | 682    | 1      | 0.00E+00 | 1223 |
| mtDNA | NC035616.1 | 99.12  | 682 | 3  | 2 | 101033 | 101711 | 682    | 1      | 0.00E+00 | 1223 |
| mtDNA | NC035616.1 | 99.12  | 682 | 3  | 2 | 5649   | 6327   | 682    | 1      | 0.00E+00 | 1223 |
| mtDNA | NC035616.1 | 98.694 | 689 | 9  | 0 | 290831 | 291519 | 147019 | 146331 | 0.00E+00 | 1223 |
| mtDNA | NC035616.1 | 98.975 | 683 | 5  | 2 | 281959 | 282640 | 187837 | 187156 | 0.00E+00 | 1221 |
| mtDNA | NC035616.1 | 98.02  | 707 | 4  | 1 | 354820 | 355516 | 169599 | 170305 | 0.00E+00 | 1219 |
| mtDNA | NC035616.1 | 99.401 | 668 | 3  | 1 | 123509 | 124175 | 180372 | 179705 | 0.00E+00 | 1210 |
| mtDNA | NC035616.1 | 99.401 | 668 | 3  | 1 | 28125  | 28791  | 180372 | 179705 | 0.00E+00 | 1210 |
| mtDNA | NC035616.1 | 98.82  | 678 | 8  | 0 | 193070 | 193747 | 258526 | 259203 | 0.00E+00 | 1208 |
| mtDNA | NC035616.1 | 100    | 641 | 0  | 0 | 121857 | 122497 | 182177 | 181537 | 0.00E+00 | 1184 |
| mtDNA | NC035616.1 | 100    | 641 | 0  | 0 | 26473  | 27113  | 182177 | 181537 | 0.00E+00 | 1184 |
| mtDNA | NC035616.1 | 98.938 | 659 | 1  | 2 | 362342 | 363000 | 323906 | 324558 | 0.00E+00 | 1173 |
| mtDNA | NC035616.1 | 98.204 | 668 | 7  | 3 | 87922  | 88586  | 265370 | 264705 | 0.00E+00 | 1162 |
| mtDNA | NC035616.1 | 97.177 | 673 | 8  | 6 | 242736 | 243404 | 250679 | 250014 | 0.00E+00 | 1127 |
| mtDNA | NC035616.1 | 99.038 | 624 | 3  | 1 | 262858 | 263481 | 233749 | 234369 | 0.00E+00 | 1116 |
| mtDNA | NC035616.1 | 97.674 | 645 | 11 | 1 | 190812 | 191456 | 255945 | 256585 | 0.00E+00 | 1105 |

|       |            |        |     |    |    |        |        |        |        |          |      |
|-------|------------|--------|-----|----|----|--------|--------|--------|--------|----------|------|
| mtDNA | NC035616.1 | 96.505 | 658 | 9  | 8  | 348341 | 348985 | 163004 | 163660 | 0.00E+00 | 1075 |
| mtDNA | NC035616.1 | 94.61  | 705 | 10 | 15 | 240119 | 240801 | 252274 | 251576 | 0.00E+00 | 1066 |
| mtDNA | NC035616.1 | 95.118 | 676 | 22 | 4  | 216533 | 217197 | 284227 | 283552 | 0.00E+00 | 1055 |
| mtDNA | NC035616.1 | 96.855 | 636 | 8  | 5  | 44111  | 44741  | 243507 | 242879 | 0.00E+00 | 1053 |
| mtDNA | NC035616.1 | 94.883 | 684 | 14 | 5  | 85565  | 86227  | 320243 | 319560 | 0.00E+00 | 1050 |
| mtDNA | NC035616.1 | 97.858 | 607 | 10 | 1  | 237857 | 238460 | 3964   | 4570   | 0.00E+00 | 1046 |
| mtDNA | NC035616.1 | 99.13  | 575 | 1  | 1  | 61279  | 61849  | 266254 | 266828 | 0.00E+00 | 1031 |
| mtDNA | NC035616.1 | 97.054 | 611 | 15 | 1  | 154861 | 155471 | 295482 | 296089 | 0.00E+00 | 1026 |
| mtDNA | NC035616.1 | 97.959 | 588 | 10 | 1  | 385382 | 385967 | 307042 | 306455 | 0.00E+00 | 1018 |
| mtDNA | NC035616.1 | 96.705 | 607 | 9  | 4  | 21244  | 21846  | 112748 | 113347 | 0.00E+00 | 1000 |
| mtDNA | NC035616.1 | 96.705 | 607 | 9  | 4  | 116628 | 117230 | 112748 | 113347 | 0.00E+00 | 1000 |
| mtDNA | NC035616.1 | 99.815 | 542 | 1  | 0  | 163851 | 164392 | 235427 | 234886 | 0.00E+00 | 996  |
| mtDNA | NC035616.1 | 99.63  | 540 | 2  | 0  | 380679 | 381218 | 93760  | 93221  | 0.00E+00 | 987  |
| mtDNA | NC035616.1 | 95.338 | 622 | 11 | 5  | 384744 | 385362 | 307694 | 307088 | 0.00E+00 | 972  |
| mtDNA | NC035616.1 | 91.81  | 696 | 22 | 8  | 65196  | 65862  | 225170 | 225859 | 0.00E+00 | 937  |
| mtDNA | NC035616.1 | 91.81  | 696 | 22 | 8  | 326818 | 327484 | 225170 | 225859 | 0.00E+00 | 937  |
| mtDNA | NC035616.1 | 98.141 | 538 | 6  | 2  | 321312 | 321846 | 26942  | 26406  | 0.00E+00 | 935  |
| mtDNA | NC035616.1 | 98.857 | 525 | 5  | 1  | 205167 | 205690 | 97251  | 97775  | 0.00E+00 | 935  |
| mtDNA | NC035616.1 | 95.254 | 590 | 12 | 4  | 188020 | 188598 | 253722 | 254306 | 0.00E+00 | 920  |
| mtDNA | NC035616.1 | 98.828 | 512 | 6  | 0  | 371930 | 372441 | 43003  | 42492  | 0.00E+00 | 913  |

|            |            |        |      |     |    |        |        |        |        |          |      |
|------------|------------|--------|------|-----|----|--------|--------|--------|--------|----------|------|
| mtDNA      | NC035616.1 | 93.881 | 621  | 8   | 9  | 155485 | 156105 | 296137 | 296727 | 0.00E+00 | 909  |
| mtDNA      | NC035616.1 | 98.444 | 514  | 3   | 1  | 13839  | 14352  | 115378 | 115886 | 0.00E+00 | 900  |
| mtDNA      | NC035616.1 | 98.444 | 514  | 3   | 1  | 109223 | 109736 | 115378 | 115886 | 0.00E+00 | 900  |
| mtDNA      | NC035616.1 | 95.825 | 503  | 1   | 1  | 377685 | 378187 | 90052  | 90534  | 0.00E+00 | 795  |
| mtDNA      | NC035616.1 | 93.621 | 533  | 10  | 9  | 120356 | 120864 | 183440 | 182908 | 0.00E+00 | 774  |
| mtDNA      | NC035616.1 | 93.621 | 533  | 10  | 9  | 24972  | 25480  | 183440 | 182908 | 0.00E+00 | 774  |
| mtDNA      | NC035616.1 | 92.415 | 501  | 9   | 14 | 90649  | 91124  | 83020  | 83516  | 0.00E+00 | 688  |
| mtDNA      | NC035616.1 | 74.045 | 890  | 174 | 42 | 231428 | 232291 | 245021 | 244163 | 2.53E-83 | 311  |
| mtDNA      | NC035616.1 | 74.045 | 890  | 174 | 42 | 101580 | 102443 | 245021 | 244163 | 2.53E-83 | 311  |
| mtDNA      | NC035616.1 | 74.045 | 890  | 174 | 42 | 6196   | 7059   | 245021 | 244163 | 2.53E-83 | 311  |
| mtDNA      | NC035616.1 | 74.667 | 750  | 145 | 34 | 42823  | 43550  | 333948 | 333222 | 3.29E-77 | 291  |
| NC035616.1 | MT043351.1 | 95.545 | 2649 | 78  | 19 | 163739 | 166367 | 126277 | 128905 | 0.00E+00 | 4202 |
| NC035616.1 | MT043351.1 | 94.908 | 2494 | 101 | 12 | 226459 | 228934 | 316747 | 314262 | 0.00E+00 | 3879 |
| NC035616.1 | MT043351.1 | 97.639 | 2245 | 47  | 3  | 118011 | 120250 | 12130  | 14373  | 0.00E+00 | 3847 |
| NC035616.1 | MT043351.1 | 94.342 | 2386 | 119 | 8  | 230451 | 232832 | 90140  | 92513  | 0.00E+00 | 3644 |
| NC035616.1 | MT043351.1 | 97.532 | 1945 | 33  | 8  | 244042 | 245979 | 45134  | 47070  | 0.00E+00 | 3312 |
| NC035616.1 | MT043351.1 | 97.011 | 1673 | 50  | 0  | 126534 | 128206 | 1      | 1673   | 0.00E+00 | 2813 |
| NC035616.1 | MT043351.1 | 98.035 | 1578 | 23  | 4  | 260479 | 262049 | 272989 | 271413 | 0.00E+00 | 2736 |
| NC035616.1 | MT043351.1 | 96.105 | 1669 | 53  | 10 | 304193 | 305855 | 202504 | 200842 | 0.00E+00 | 2712 |
| NC035616.1 | MT043351.1 | 94.89  | 1722 | 65  | 11 | 302111 | 303826 | 205205 | 203501 | 0.00E+00 | 2671 |

|            |            |        |      |     |    |        |        |        |        |          |      |
|------------|------------|--------|------|-----|----|--------|--------|--------|--------|----------|------|
| NC035616.1 | MT043351.1 | 93.388 | 1815 | 73  | 18 | 235608 | 237400 | 303302 | 305091 | 0.00E+00 | 2643 |
| NC035616.1 | MT043351.1 | 95.331 | 1649 | 60  | 10 | 290572 | 292209 | 21958  | 20316  | 0.00E+00 | 2603 |
| NC035616.1 | MT043351.1 | 96.487 | 1537 | 17  | 16 | 262100 | 263636 | 271420 | 269921 | 0.00E+00 | 2505 |
| NC035616.1 | MT043351.1 | 93.794 | 1547 | 95  | 1  | 148166 | 149711 | 224179 | 225725 | 0.00E+00 | 2324 |
| NC035616.1 | MT043351.1 | 95.112 | 1473 | 59  | 5  | 88538  | 89999  | 182361 | 183831 | 0.00E+00 | 2309 |
| NC035616.1 | MT043351.1 | 95.284 | 1357 | 48  | 5  | 256837 | 258193 | 152604 | 151264 | 0.00E+00 | 2137 |
| NC035616.1 | MT043351.1 | 95.557 | 1328 | 44  | 6  | 292258 | 293582 | 20304  | 18989  | 0.00E+00 | 2111 |
| NC035616.1 | MT043351.1 | 97.284 | 1215 | 30  | 2  | 134166 | 135377 | 135695 | 134481 | 0.00E+00 | 2058 |
| NC035616.1 | MT043351.1 | 94.765 | 1318 | 48  | 11 | 131365 | 132666 | 137973 | 136661 | 0.00E+00 | 2032 |
| NC035616.1 | MT043351.1 | 94.419 | 1326 | 36  | 10 | 95016  | 96313  | 5832   | 4517   | 0.00E+00 | 2004 |
| NC035616.1 | MT043351.1 | 96.222 | 1191 | 35  | 3  | 21038  | 22228  | 187131 | 185951 | 0.00E+00 | 1941 |
| NC035616.1 | MT043351.1 | 90.244 | 1517 | 78  | 28 | 298308 | 299786 | 54638  | 56122  | 0.00E+00 | 1917 |
| NC035616.1 | MT043351.1 | 83.072 | 2044 | 292 | 27 | 176452 | 178474 | 278190 | 280200 | 0.00E+00 | 1808 |
| NC035616.1 | MT043351.1 | 93.117 | 1235 | 63  | 12 | 187941 | 189158 | 80577  | 79348  | 0.00E+00 | 1790 |
| NC035616.1 | MT043351.1 | 96.532 | 1067 | 24  | 4  | 332408 | 333464 | 133152 | 134215 | 0.00E+00 | 1753 |
| NC035616.1 | MT043351.1 | 95.93  | 1081 | 34  | 6  | 116879 | 117953 | 11032  | 12108  | 0.00E+00 | 1744 |
| NC035616.1 | MT043351.1 | 93.322 | 1168 | 59  | 7  | 24019  | 25184  | 141758 | 142908 | 0.00E+00 | 1707 |
| NC035616.1 | MT043351.1 | 91.587 | 1248 | 64  | 21 | 9722   | 10946  | 346585 | 345356 | 0.00E+00 | 1685 |
| NC035616.1 | MT043351.1 | 94.649 | 1084 | 38  | 7  | 58236  | 59302  | 355561 | 354481 | 0.00E+00 | 1663 |
| NC035616.1 | MT043351.1 | 92.928 | 1103 | 52  | 12 | 289398 | 290491 | 23087  | 22002  | 0.00E+00 | 1581 |

|            |            |        |      |    |    |        |        |        |        |          |      |
|------------|------------|--------|------|----|----|--------|--------|--------|--------|----------|------|
| NC035616.1 | MT043351.1 | 95.603 | 978  | 42 | 1  | 67751  | 68728  | 334225 | 335201 | 0.00E+00 | 1567 |
| NC035616.1 | MT043351.1 | 97.143 | 875  | 25 | 0  | 166886 | 167760 | 129046 | 129920 | 0.00E+00 | 1478 |
| NC035616.1 | MT043351.1 | 96.317 | 896  | 23 | 6  | 167810 | 168700 | 129948 | 130838 | 0.00E+00 | 1463 |
| NC035616.1 | MT043351.1 | 99.366 | 789  | 4  | 1  | 244042 | 244830 | 113831 | 113044 | 0.00E+00 | 1428 |
| NC035616.1 | MT043351.1 | 95.084 | 895  | 42 | 2  | 210807 | 211701 | 109416 | 108524 | 0.00E+00 | 1408 |
| NC035616.1 | MT043351.1 | 92.262 | 1008 | 38 | 19 | 65166  | 66143  | 332222 | 333219 | 0.00E+00 | 1393 |
| NC035616.1 | MT043351.1 | 96.074 | 815  | 27 | 1  | 125023 | 125832 | 376484 | 377298 | 0.00E+00 | 1323 |
| NC035616.1 | MT043351.1 | 95.896 | 804  | 29 | 1  | 190531 | 191334 | 297789 | 296990 | 0.00E+00 | 1299 |
| NC035616.1 | MT043351.1 | 95.729 | 796  | 29 | 3  | 29737  | 30528  | 111547 | 112341 | 0.00E+00 | 1277 |
| NC035616.1 | MT043351.1 | 92.057 | 919  | 46 | 10 | 248111 | 249017 | 300075 | 299172 | 0.00E+00 | 1267 |
| NC035616.1 | MT043351.1 | 95.812 | 788  | 21 | 5  | 285735 | 286520 | 28485  | 27708  | 0.00E+00 | 1262 |
| NC035616.1 | MT043351.1 | 94.913 | 806  | 34 | 5  | 30658  | 31462  | 163797 | 164596 | 0.00E+00 | 1254 |
| NC035616.1 | MT043351.1 | 95.408 | 784  | 35 | 1  | 128505 | 129287 | 110379 | 109596 | 0.00E+00 | 1247 |
| NC035616.1 | MT043351.1 | 93.132 | 859  | 45 | 10 | 252326 | 253174 | 373613 | 372759 | 0.00E+00 | 1247 |
| NC035616.1 | MT043351.1 | 95.437 | 789  | 23 | 9  | 180432 | 181217 | 196839 | 197617 | 0.00E+00 | 1245 |
| NC035616.1 | MT043351.1 | 94.061 | 825  | 35 | 3  | 2152   | 2975   | 53482  | 54293  | 0.00E+00 | 1240 |
| NC035616.1 | MT043351.1 | 94.022 | 803  | 35 | 10 | 287265 | 288065 | 26758  | 25967  | 0.00E+00 | 1205 |
| NC035616.1 | MT043351.1 | 94.465 | 795  | 23 | 4  | 232916 | 233703 | 92525  | 93305  | 0.00E+00 | 1205 |
| NC035616.1 | MT043351.1 | 95.635 | 756  | 21 | 4  | 66868  | 67617  | 333393 | 334142 | 0.00E+00 | 1203 |
| NC035616.1 | MT043351.1 | 95.867 | 750  | 16 | 6  | 288109 | 288850 | 25968  | 25226  | 0.00E+00 | 1199 |

|            |            |        |      |    |    |        |        |        |        |          |      |
|------------|------------|--------|------|----|----|--------|--------|--------|--------|----------|------|
| NC035616.1 | MT043351.1 | 95.491 | 754  | 22 | 3  | 254384 | 255133 | 15645  | 16390  | 0.00E+00 | 1194 |
| NC035616.1 | MT043351.1 | 92.169 | 830  | 49 | 9  | 3977   | 4798   | 100581 | 99760  | 0.00E+00 | 1158 |
| NC035616.1 | MT043351.1 | 96.491 | 684  | 20 | 4  | 187156 | 187837 | 81379  | 80698  | 0.00E+00 | 1127 |
| NC035616.1 | MT043351.1 | 94.061 | 724  | 30 | 4  | 1277   | 1992   | 163526 | 162808 | 0.00E+00 | 1086 |
| NC035616.1 | MT043351.1 | 90.233 | 860  | 42 | 18 | 331530 | 332369 | 132306 | 133143 | 0.00E+00 | 1085 |
| NC035616.1 | MT043351.1 | 84.036 | 1234 | 74 | 59 | 295536 | 296717 | 244363 | 245525 | 0.00E+00 | 1074 |
| NC035616.1 | MT043351.1 | 96.729 | 642  | 20 | 1  | 181537 | 182177 | 197825 | 198466 | 0.00E+00 | 1068 |
| NC035616.1 | MT043351.1 | 95.489 | 665  | 27 | 3  | 25591  | 26254  | 143072 | 143734 | 0.00E+00 | 1059 |
| NC035616.1 | MT043351.1 | 94.838 | 678  | 20 | 6  | 179705 | 180372 | 196156 | 196828 | 0.00E+00 | 1044 |
| NC035616.1 | MT043351.1 | 91.867 | 750  | 31 | 10 | 96359  | 97089  | 4504   | 3766   | 0.00E+00 | 1020 |
| NC035616.1 | MT043351.1 | 95.447 | 593  | 24 | 1  | 297440 | 298029 | 319329 | 318737 | 0.00E+00 | 942  |
| NC035616.1 | MT043351.1 | 94.754 | 610  | 24 | 4  | 146417 | 147019 | 335642 | 335034 | 0.00E+00 | 942  |
| NC035616.1 | MT043351.1 | 89.345 | 779  | 39 | 17 | 90892  | 91659  | 184514 | 185259 | 0.00E+00 | 939  |
| NC035616.1 | MT043351.1 | 90.155 | 711  | 37 | 11 | 31599  | 32301  | 320361 | 321046 | 0.00E+00 | 894  |
| NC035616.1 | MT043351.1 | 97.143 | 525  | 15 | 0  | 233749 | 234273 | 93310  | 93834  | 0.00E+00 | 887  |
| NC035616.1 | MT043351.1 | 95.404 | 544  | 13 | 6  | 306455 | 306994 | 200148 | 199613 | 0.00E+00 | 856  |
| NC035616.1 | MT043351.1 | 96.024 | 503  | 15 | 2  | 57271  | 57768  | 356601 | 356099 | 0.00E+00 | 813  |
| NC035616.1 | MT043351.1 | 93.285 | 551  | 36 | 1  | 41688  | 42237  | 274762 | 275312 | 0.00E+00 | 811  |
| NC035616.1 | MT043351.1 | 88.739 | 666  | 46 | 14 | 163006 | 163660 | 125586 | 126233 | 0.00E+00 | 787  |
| NC035616.1 | MT043351.1 | 92.939 | 524  | 36 | 1  | 258589 | 259111 | 150922 | 150399 | 0.00E+00 | 761  |



|            |            |        |      |     |    |        |        |        |        |          |      |
|------------|------------|--------|------|-----|----|--------|--------|--------|--------|----------|------|
| NC035616.1 | MT043351.1 | 91.86  | 516  | 26  | 8  | 324049 | 324558 | 67886  | 68391  | 0.00E+00 | 706  |
| NC035616.1 | MT043351.1 | 87.931 | 580  | 30  | 18 | 125956 | 126533 | 377323 | 377864 | 0.00E+00 | 647  |
| NC035616.1 | MT043351.1 | 74.7   | 751  | 143 | 37 | 333222 | 333948 | 45255  | 45982  | 3.08E-77 | 291  |
| NC035616.1 | MT043351.1 | 73.256 | 688  | 142 | 37 | 333222 | 333888 | 113710 | 113044 | 6.85E-54 | 213  |
| MT043351.1 | NC040010.1 | 95.582 | 4776 | 151 | 22 | 196043 | 200772 | 339030 | 343791 | 0.00E+00 | 7596 |
| MT043351.1 | NC040010.1 | 94.402 | 4627 | 172 | 30 | 18640  | 23205  | 144619 | 140019 | 0.00E+00 | 7029 |
| MT043351.1 | NC040010.1 | 93.879 | 4460 | 161 | 38 | 200798 | 205209 | 343787 | 348182 | 0.00E+00 | 6621 |
| MT043351.1 | NC040010.1 | 96.108 | 3957 | 119 | 9  | 29229  | 33182  | 23909  | 19985  | 0.00E+00 | 6421 |
| MT043351.1 | NC040010.1 | 95.334 | 4029 | 145 | 13 | 89882  | 93876  | 457539 | 461558 | 0.00E+00 | 6359 |
| MT043351.1 | NC040010.1 | 97.323 | 3511 | 82  | 9  | 11018  | 14522  | 47212  | 50716  | 0.00E+00 | 5952 |
| MT043351.1 | NC040010.1 | 95.787 | 3560 | 77  | 24 | 269929 | 273430 | 200080 | 203624 | 0.00E+00 | 5675 |
| MT043351.1 | NC040010.1 | 95.412 | 3531 | 113 | 21 | 125561 | 129060 | 288728 | 285216 | 0.00E+00 | 5578 |
| MT043351.1 | NC040010.1 | 95.318 | 3353 | 121 | 12 | 18640  | 21960  | 155957 | 152609 | 0.00E+00 | 5289 |
| MT043351.1 | NC040010.1 | 94.182 | 3489 | 123 | 30 | 205274 | 208717 | 348520 | 351973 | 0.00E+00 | 5245 |
| MT043351.1 | NC040010.1 | 96.174 | 2509 | 80  | 12 | 314262 | 316759 | 232342 | 234845 | 0.00E+00 | 4087 |
| MT043351.1 | NC040010.1 | 94.302 | 2580 | 100 | 15 | 3731   | 6265   | 257671 | 255094 | 0.00E+00 | 3906 |
| MT043351.1 | NC040010.1 | 92.046 | 2703 | 125 | 39 | 298792 | 301422 | 226836 | 229520 | 0.00E+00 | 3718 |
| MT043351.1 | NC040010.1 | 95.816 | 2175 | 69  | 9  | 135799 | 137961 | 211999 | 209835 | 0.00E+00 | 3493 |
| MT043351.1 | NC040010.1 | 96.457 | 2117 | 73  | 1  | 303302 | 305416 | 454690 | 452574 | 0.00E+00 | 3493 |
| MT043351.1 | NC040010.1 | 94.688 | 2278 | 69  | 14 | 333398 | 335642 | 165731 | 167989 | 0.00E+00 | 3489 |

|            |            |        |      |     |    |        |        |        |        |          |      |
|------------|------------|--------|------|-----|----|--------|--------|--------|--------|----------|------|
| MT043351.1 | NC040010.1 | 95.339 | 2167 | 84  | 12 | 25084  | 27239  | 137797 | 135637 | 0.00E+00 | 3426 |
| MT043351.1 | NC040010.1 | 94.986 | 2114 | 73  | 14 | 354599 | 356691 | 263634 | 261533 | 0.00E+00 | 3286 |
| MT043351.1 | NC040010.1 | 96.622 | 1806 | 54  | 2  | 1      | 1801   | 110152 | 111955 | 0.00E+00 | 2990 |
| MT043351.1 | NC040010.1 | 96.077 | 1810 | 53  | 6  | 129046 | 130840 | 284945 | 283139 | 0.00E+00 | 2933 |
| MT043351.1 | NC040010.1 | 90.791 | 2237 | 104 | 39 | 67888  | 70053  | 449399 | 447194 | 0.00E+00 | 2896 |
| MT043351.1 | NC040010.1 | 90.121 | 2146 | 162 | 32 | 296474 | 298593 | 224465 | 226586 | 0.00E+00 | 2743 |
| MT043351.1 | NC040010.1 | 96.169 | 1540 | 49  | 4  | 182499 | 184037 | 291070 | 292600 | 0.00E+00 | 2508 |
| MT043351.1 | NC040010.1 | 95.208 | 1586 | 60  | 6  | 185605 | 187186 | 372824 | 371251 | 0.00E+00 | 2494 |
| MT043351.1 | NC040010.1 | 94.144 | 1571 | 88  | 4  | 224159 | 225725 | 424870 | 426440 | 0.00E+00 | 2388 |
| MT043351.1 | NC040010.1 | 95.792 | 1402 | 49  | 3  | 151265 | 152656 | 16826  | 15425  | 0.00E+00 | 2254 |
| MT043351.1 | NC040010.1 | 92.283 | 1568 | 69  | 13 | 301444 | 302973 | 229513 | 231066 | 0.00E+00 | 2178 |
| MT043351.1 | NC040010.1 | 91.683 | 1575 | 77  | 21 | 23205  | 24759  | 139991 | 138451 | 0.00E+00 | 2134 |
| MT043351.1 | NC040010.1 | 97.727 | 1188 | 27  | 0  | 134481 | 135668 | 213318 | 212131 | 0.00E+00 | 2045 |
| MT043351.1 | NC040010.1 | 92.702 | 1384 | 49  | 15 | 132274 | 133629 | 476331 | 477690 | 0.00E+00 | 1949 |
| MT043351.1 | NC040010.1 | 92.037 | 1419 | 51  | 9  | 309152 | 310520 | 299124 | 297718 | 0.00E+00 | 1938 |
| MT043351.1 | NC040010.1 | 96.872 | 1151 | 32  | 2  | 2589   | 3736   | 258928 | 257779 | 0.00E+00 | 1923 |
| MT043351.1 | NC040010.1 | 95.177 | 1161 | 36  | 13 | 141758 | 142908 | 97291  | 98441  | 0.00E+00 | 1816 |
| MT043351.1 | NC040010.1 | 92.012 | 1327 | 47  | 26 | 376484 | 377771 | 108722 | 110028 | 0.00E+00 | 1808 |
| MT043351.1 | NC040010.1 | 97.881 | 991  | 17  | 3  | 46086  | 47076  | 1589   | 2575   | 0.00E+00 | 1711 |
| MT043351.1 | NC040010.1 | 91.325 | 1268 | 65  | 25 | 79348  | 80598  | 411967 | 413206 | 0.00E+00 | 1690 |

|            |            |        |      |    |    |        |        |        |        |          |      |
|------------|------------|--------|------|----|----|--------|--------|--------|--------|----------|------|
| MT043351.1 | NC040010.1 | 92.908 | 1128 | 38 | 13 | 318415 | 319518 | 396710 | 395601 | 0.00E+00 | 1602 |
| MT043351.1 | NC040010.1 | 92.824 | 1087 | 48 | 13 | 55077  | 56145  | 72841  | 71767  | 0.00E+00 | 1548 |
| MT043351.1 | NC040010.1 | 91.904 | 1087 | 56 | 16 | 99766  | 100833 | 188728 | 189801 | 0.00E+00 | 1491 |
| MT043351.1 | NC040010.1 | 92.823 | 1045 | 46 | 15 | 332304 | 333342 | 164146 | 165167 | 0.00E+00 | 1487 |
| MT043351.1 | NC040010.1 | 95.861 | 894  | 35 | 2  | 108523 | 109416 | 409565 | 410456 | 0.00E+00 | 1445 |
| MT043351.1 | NC040010.1 | 96.471 | 850  | 22 | 2  | 163755 | 164596 | 303504 | 304353 | 0.00E+00 | 1397 |
| MT043351.1 | NC040010.1 | 95.039 | 887  | 35 | 4  | 109596 | 110480 | 362171 | 363050 | 0.00E+00 | 1386 |
| MT043351.1 | NC040010.1 | 96.014 | 828  | 23 | 3  | 53493  | 54310  | 132506 | 133333 | 0.00E+00 | 1338 |
| MT043351.1 | NC040010.1 | 90.707 | 990  | 75 | 12 | 45134  | 46111  | 122067 | 123051 | 0.00E+00 | 1303 |
| MT043351.1 | NC040010.1 | 96.094 | 768  | 27 | 1  | 33882  | 34649  | 178827 | 179591 | 0.00E+00 | 1249 |
| MT043351.1 | NC040010.1 | 98.692 | 688  | 9  | 0  | 133528 | 134215 | 477690 | 478377 | 0.00E+00 | 1221 |
| MT043351.1 | NC040010.1 | 91.135 | 925  | 45 | 13 | 320100 | 321007 | 77270  | 78174  | 0.00E+00 | 1219 |
| MT043351.1 | NC040010.1 | 94.332 | 794  | 38 | 6  | 113044 | 113831 | 122859 | 122067 | 0.00E+00 | 1210 |
| MT043351.1 | NC040010.1 | 95.745 | 752  | 21 | 4  | 80682  | 81426  | 413246 | 413993 | 0.00E+00 | 1201 |
| MT043351.1 | NC040010.1 | 94.226 | 762  | 23 | 8  | 307944 | 308689 | 300425 | 299669 | 0.00E+00 | 1144 |
| MT043351.1 | NC040010.1 | 96.246 | 666  | 22 | 3  | 143072 | 143735 | 99019  | 99683  | 0.00E+00 | 1088 |
| MT043351.1 | NC040010.1 | 94.452 | 703  | 23 | 4  | 27691  | 28386  | 134970 | 134277 | 0.00E+00 | 1068 |
| MT043351.1 | NC040010.1 | 94.548 | 697  | 28 | 4  | 353691 | 354382 | 265374 | 264683 | 0.00E+00 | 1068 |
| MT043351.1 | NC040010.1 | 92.848 | 741  | 43 | 3  | 15660  | 16390  | 112604 | 113344 | 0.00E+00 | 1066 |
| MT043351.1 | NC040010.1 | 96.463 | 622  | 21 | 1  | 1940   | 2561   | 259535 | 258915 | 0.00E+00 | 1026 |

|            |            |        |     |     |    |        |        |        |        |          |     |
|------------|------------|--------|-----|-----|----|--------|--------|--------|--------|----------|-----|
| MT043351.1 | NC040010.1 | 93.722 | 669 | 32  | 5  | 374309 | 374972 | 326206 | 326869 | 0.00E+00 | 994 |
| MT043351.1 | NC040010.1 | 93.445 | 656 | 43  | 0  | 274739 | 275394 | 408832 | 408177 | 0.00E+00 | 974 |
| MT043351.1 | NC040010.1 | 96.128 | 594 | 15  | 4  | 124908 | 125493 | 289499 | 288906 | 0.00E+00 | 963 |
| MT043351.1 | NC040010.1 | 91.728 | 677 | 38  | 5  | 66345  | 67008  | 451117 | 450446 | 0.00E+00 | 924 |
| MT043351.1 | NC040010.1 | 94.407 | 590 | 21  | 5  | 209136 | 209713 | 352622 | 353211 | 0.00E+00 | 896 |
| MT043351.1 | NC040010.1 | 91.592 | 666 | 31  | 8  | 187584 | 188232 | 370893 | 370236 | 0.00E+00 | 896 |
| MT043351.1 | NC040010.1 | 87.5   | 800 | 51  | 17 | 184500 | 185270 | 292673 | 293452 | 0.00E+00 | 878 |
| MT043351.1 | NC040010.1 | 95.183 | 519 | 20  | 1  | 162895 | 163413 | 61588  | 62101  | 0.00E+00 | 815 |
| MT043351.1 | NC040010.1 | 91.05  | 581 | 51  | 1  | 234023 | 234603 | 52630  | 52051  | 0.00E+00 | 784 |
| MT043351.1 | NC040010.1 | 85.942 | 754 | 73  | 18 | 71845  | 72577  | 218337 | 217596 | 0.00E+00 | 774 |
| MT043351.1 | NC040010.1 | 89.661 | 619 | 40  | 9  | 346483 | 347080 | 178824 | 178209 | 0.00E+00 | 767 |
| MT043351.1 | NC040010.1 | 87.106 | 667 | 49  | 18 | 17933  | 18587  | 157004 | 156363 | 0.00E+00 | 721 |
| MT043351.1 | NC040010.1 | 92.829 | 502 | 18  | 7  | 67007  | 67490  | 450375 | 449874 | 0.00E+00 | 712 |
| MT043351.1 | NC040010.1 | 89.981 | 539 | 23  | 10 | 269405 | 269917 | 199490 | 200023 | 0.00E+00 | 667 |
| MT043351.1 | NC040010.1 | 73.333 | 570 | 124 | 26 | 45255  | 45810  | 478130 | 478685 | 2.14E-45 | 185 |
| MT043351.1 | NC040010.1 | 73.333 | 570 | 124 | 26 | 113155 | 113710 | 478685 | 478130 | 2.14E-45 | 185 |

---

**Table S9.** RNA editing events predicted in *Punica granatum* mitochondrial genome using BEDTools software

| Region      | Position | Reference | Strand | Coverage-q30 | MeanQ | BaseCount[A,C,G,T]   | AllSubs  | Frequency |
|-------------|----------|-----------|--------|--------------|-------|----------------------|----------|-----------|
| <i>atp1</i> | 1490     | C         | 2      | 12161        | 37.48 | [15, 219, 12, 11915] | CT CA CG | 0.98      |
| <i>atp1</i> | 1523     | C         | 2      | 12587        | 37.09 | [1, 229, 0, 12357]   | CT CA    | 0.98      |
| <i>atp4</i> | 56       | C         | 2      | 7445         | 37.79 | [0, 223, 0, 7222]    | CT       | 0.97      |
| <i>atp4</i> | 59       | C         | 2      | 7169         | 37.61 | [1, 397, 0, 6771]    | CT CA    | 0.94      |
| <i>atp4</i> | 89       | C         | 2      | 8095         | 37.64 | [1, 240, 0, 7854]    | CT CA    | 0.97      |
| <i>atp4</i> | 118      | C         | 2      | 8597         | 37.6  | [1, 176, 0, 8420]    | CT CA    | 0.98      |
| <i>atp4</i> | 138      | C         | 2      | 8901         | 37.66 | [1, 634, 0, 8266]    | CT CA    | 0.93      |
| <i>atp4</i> | 171      | C         | 2      | 11153        | 37.47 | [3, 8051, 2, 3097]   | CT CA CG | 0.28      |
| <i>atp4</i> | 215      | C         | 2      | 13220        | 37.56 | [0, 315, 0, 12905]   | CT       | 0.98      |
| <i>atp4</i> | 227      | C         | 2      | 12789        | 37.33 | [5, 533, 2, 12249]   | CT CA CG | 0.96      |
| <i>atp4</i> | 248      | C         | 2      | 13277        | 37.6  | [3, 443, 0, 12831]   | CT CA    | 0.97      |
| <i>atp4</i> | 251      | C         | 2      | 13571        | 37.71 | [0, 487, 2, 13082]   | CT CG    | 0.96      |
| <i>atp4</i> | 395      | C         | 2      | 14907        | 37.53 | [3, 329, 1, 14574]   | CT CA CG | 0.98      |
| <i>atp4</i> | 407      | C         | 2      | 14507        | 37.72 | [1, 489, 0, 14017]   | CT CA    | 0.97      |
| <i>atp4</i> | 416      | C         | 2      | 13654        | 37.14 | [14, 268, 5, 13367]  | CT CA CG | 0.98      |
| <i>atp6</i> | 37       | C         | 2      | 8332         | 37.59 | [1, 218, 0, 8113]    | CT CA    | 0.97      |
| <i>atp6</i> | 116      | C         | 2      | 9566         | 37.65 | [2, 342, 0, 9222]    | CT CA    | 0.96      |
| <i>atp6</i> | 173      | C         | 2      | 10024        | 37.62 | [5, 328, 3, 9688]    | CT CA CG | 0.97      |
| <i>atp6</i> | 229      | C         | 2      | 9995         | 37.67 | [0, 200, 5, 9790]    | CT CG    | 0.98      |
| <i>atp6</i> | 236      | C         | 2      | 10264        | 37.63 | [0, 491, 2, 9771]    | CT CG    | 0.95      |
| <i>atp6</i> | 254      | C         | 2      | 9358         | 37.74 | [0, 456, 0, 8902]    | CT       | 0.95      |
| <i>atp6</i> | 262      | C         | 2      | 9245         | 37.72 | [0, 209, 0, 9036]    | CT       | 0.98      |
| <i>atp6</i> | 269      | C         | 2      | 8857         | 37.44 | [4, 272, 1, 8580]    | CT CA CG | 0.97      |
| <i>atp6</i> | 270      | C         | 2      | 8450         | 36.98 | [0, 4034, 1, 4415]   | CT CG    | 0.52      |
| <i>atp6</i> | 401      | C         | 2      | 9961         | 37.68 | [1, 166, 0, 9794]    | CT CA    | 0.98      |
| <i>atp6</i> | 460      | C         | 2      | 10010        | 37.56 | [0, 145, 0, 9865]    | CT       | 0.99      |
| <i>atp6</i> | 463      | C         | 2      | 10043        | 37.71 | [1, 172, 0, 9870]    | CT CA    | 0.98      |
| <i>atp6</i> | 485      | C         | 2      | 9087         | 37.63 | [3, 379, 0, 8705]    | CT CA    | 0.96      |
| <i>atp6</i> | 527      | C         | 2      | 9044         | 37.66 | [0, 224, 0, 8820]    | CT       | 0.98      |
| <i>atp6</i> | 548      | C         | 2      | 7768         | 37.17 | [5, 556, 2, 7205]    | CT CA CG | 0.93      |
| <i>atp6</i> | 549      | C         | 2      | 7359         | 37.09 | [0, 6250, 0, 1109]   | CT       | 0.15      |
| <i>atp6</i> | 664      | C         | 2      | 4090         | 37.47 | [1, 133, 1, 3955]    | CT CA CG | 0.97      |

|             |     |   |   |        |       |                         |          |      |
|-------------|-----|---|---|--------|-------|-------------------------|----------|------|
| <i>atp6</i> | 671 | C | 2 | 3916   | 37.23 | [0, 155, 0, 3761]       | CT       | 0.96 |
| <i>atp6</i> | 680 | C | 2 | 3391   | 37.65 | [4, 130, 0, 3257]       | CT CA    | 0.96 |
| <i>atp6</i> | 707 | C | 2 | 2125   | 37.59 | [5, 162, 4, 1954]       | CT CA CG | 0.92 |
| <i>atp6</i> | 718 | C | 2 | 1832   | 37.71 | [4, 130, 1, 1697]       | CT CA CG | 0.93 |
| <i>atp8</i> | 30  | C | 2 | 3347   | 37.47 | [1, 2806, 0, 540]       | CT CA    | 0.16 |
| <i>atp8</i> | 47  | C | 2 | 3555   | 37.63 | [7, 879, 0, 2669]       | CT CA    | 0.75 |
| <i>atp8</i> | 58  | C | 2 | 3752   | 37.62 | [2, 1166, 1, 2583]      | CT CA CG | 0.69 |
| <i>atp8</i> | 76  | C | 2 | 3983   | 37.67 | [2, 237, 0, 3744]       | CT CA    | 0.94 |
| <i>atp8</i> | 77  | C | 2 | 3983   | 37.61 | [1, 395, 0, 3587]       | CT CA    | 0.9  |
| <i>atp8</i> | 452 | C | 2 | 13213  | 37.51 | [1, 434, 0, 12778]      | CT CA    | 0.97 |
| <i>atp9</i> | 20  | C | 2 | 80921  | 37.63 | [23, 751, 0, 80147]     | CT CA    | 0.99 |
| <i>atp9</i> | 50  | C | 2 | 96704  | 37.64 | [26, 761, 0, 95917]     | CT CA    | 0.99 |
| <i>atp9</i> | 134 | C | 2 | 147385 | 37.68 | [88, 1885, 0, 145412]   | CT CA    | 0.99 |
| <i>atp9</i> | 190 | C | 2 | 157287 | 37.18 | [49, 137552, 13, 19673] | CT CA CG | 0.13 |
| <i>atp9</i> | 191 | C | 2 | 163144 | 37.72 | [247, 6450, 92, 156355] | CT CA CG | 0.96 |
| <i>atp9</i> | 223 | C | 2 | 171282 | 37.65 | [12, 1890, 6, 169374]   | CT CA CG | 0.99 |
| <i>ccmB</i> | 28  | C | 2 | 13441  | 37.32 | [0, 11622, 0, 1819]     | CT       | 0.14 |
| <i>ccmB</i> | 39  | C | 2 | 13728  | 37.48 | [3, 2651, 0, 11074]     | CT CA    | 0.81 |
| <i>ccmB</i> | 43  | C | 2 | 13101  | 37.16 | [3, 10073, 0, 3025]     | CT CA    | 0.23 |
| <i>ccmB</i> | 48  | C | 2 | 13241  | 37.55 | [0, 2780, 1, 10460]     | CT CG    | 0.79 |
| <i>ccmB</i> | 50  | C | 2 | 13321  | 37.58 | [3, 2741, 0, 10577]     | CT CA    | 0.79 |
| <i>ccmB</i> | 71  | C | 2 | 14947  | 37.44 | [0, 12404, 1, 2542]     | CT CG    | 0.17 |
| <i>ccmB</i> | 90  | C | 2 | 18492  | 37.62 | [1, 1780, 0, 16711]     | CT CA    | 0.9  |
| <i>ccmB</i> | 128 | C | 2 | 20218  | 37.36 | [0, 17645, 0, 2573]     | CT       | 0.13 |
| <i>ccmB</i> | 148 | C | 2 | 1985   | 37.11 | [1, 409, 0, 1575]       | CT CA    | 0.79 |
| <i>ccmB</i> | 149 | C | 2 | 2035   | 37.46 | [0, 459, 0, 1576]       | CT       | 0.77 |
| <i>ccmB</i> | 160 | C | 2 | 2181   | 37.11 | [0, 457, 0, 1724]       | CT       | 0.79 |
| <i>ccmB</i> | 164 | C | 2 | 2245   | 37.51 | [2, 515, 1, 1727]       | CT CA CG | 0.77 |
| <i>ccmB</i> | 172 | C | 2 | 2255   | 37.22 | [0, 285, 0, 1970]       | CT       | 0.87 |
| <i>ccmB</i> | 179 | C | 2 | 2169   | 37.31 | [0, 494, 0, 1675]       | CT       | 0.77 |
| <i>ccmB</i> | 181 | C | 2 | 2148   | 37.27 | [1, 514, 0, 1633]       | CT CA    | 0.76 |
| <i>ccmB</i> | 193 | C | 2 | 1861   | 37.46 | [0, 254, 0, 1607]       | CT       | 0.86 |

|             |     |   |   |      |       |                     |          |      |
|-------------|-----|---|---|------|-------|---------------------|----------|------|
| <i>ccmB</i> | 194 | C | 2 | 1896 | 37.52 | [0, 253, 0, 1643]   | CT       | 0.87 |
| <i>ccmB</i> | 286 | C | 2 | 2837 | 37.52 | [0, 609, 0, 2228]   | CT       | 0.79 |
| <i>ccmB</i> | 304 | C | 2 | 2984 | 37.49 | [1, 334, 0, 2649]   | CT CA    | 0.89 |
| <i>ccmB</i> | 313 | C | 2 | 3028 | 37.59 | [1, 477, 2, 2548]   | CT CG CA | 0.84 |
| <i>ccmB</i> | 357 | C | 2 | 3783 | 37.14 | [0, 3129, 0, 654]   | CT       | 0.17 |
| <i>ccmB</i> | 367 | C | 2 | 3989 | 37.48 | [0, 485, 0, 3504]   | CT       | 0.88 |
| <i>ccmB</i> | 375 | C | 2 | 4167 | 37.28 | [0, 2885, 0, 1282]  | CT       | 0.31 |
| <i>ccmB</i> | 379 | C | 2 | 4190 | 37.32 | [2, 1204, 0, 2984]  | CT CA    | 0.71 |
| <i>ccmB</i> | 391 | C | 2 | 3901 | 37    | [4, 1558, 0, 2339]  | CT CA    | 0.6  |
| <i>ccmB</i> | 392 | C | 2 | 4011 | 37.34 | [0, 1376, 2, 2633]  | CT CG    | 0.66 |
| <i>ccmB</i> | 406 | C | 2 | 4109 | 37.4  | [0, 1013, 0, 3096]  | CT       | 0.75 |
| <i>ccmB</i> | 424 | C | 2 | 4203 | 37.59 | [0, 606, 0, 3597]   | CT       | 0.86 |
| <i>ccmB</i> | 428 | C | 2 | 4202 | 37.5  | [0, 281, 0, 3921]   | CT       | 0.93 |
| <i>ccmB</i> | 467 | C | 2 | 3748 | 37.46 | [1, 475, 2, 3270]   | CT CG CA | 0.87 |
| <i>ccmB</i> | 475 | C | 2 | 3424 | 37.41 | [0, 321, 0, 3103]   | CT       | 0.91 |
| <i>ccmB</i> | 476 | C | 2 | 3465 | 37.62 | [0, 345, 0, 3120]   | CT       | 0.9  |
| <i>ccmB</i> | 485 | C | 2 | 3482 | 37.64 | [1, 377, 0, 3104]   | CT CA    | 0.89 |
| <i>ccmB</i> | 494 | C | 2 | 3671 | 37.66 | [0, 442, 0, 3229]   | CT       | 0.88 |
| <i>ccmB</i> | 502 | C | 2 | 2993 | 37.46 | [36, 353, 16, 2588] | CT CA CG | 0.88 |
| <i>ccmB</i> | 503 | C | 2 | 2842 | 37.61 | [8, 412, 1, 2421]   | CT CA CG | 0.85 |
| <i>ccmB</i> | 512 | C | 2 | 2774 | 37.52 | [1, 360, 0, 2413]   | CT CA    | 0.87 |
| <i>ccmB</i> | 514 | C | 2 | 2769 | 37.69 | [0, 316, 0, 2453]   | CT       | 0.89 |
| <i>ccmB</i> | 547 | C | 2 | 2652 | 36.51 | [0, 2335, 0, 317]   | CT       | 0.12 |
| <i>ccmB</i> | 551 | C | 2 | 2956 | 37.63 | [2, 211, 0, 2743]   | CT CA    | 0.93 |
| <i>ccmB</i> | 554 | C | 2 | 3358 | 37.59 | [0, 317, 0, 3041]   | CT       | 0.91 |
| <i>ccmB</i> | 566 | C | 2 | 3040 | 37.14 | [0, 291, 0, 2749]   | CT       | 0.9  |
| <i>ccmB</i> | 569 | C | 2 | 3067 | 37.39 | [0, 306, 0, 2761]   | CT       | 0.9  |
| <i>ccmB</i> | 572 | C | 2 | 3079 | 37.6  | [0, 219, 0, 2860]   | CT       | 0.93 |
| <i>ccmB</i> | 576 | C | 2 | 3059 | 37.24 | [0, 807, 0, 2252]   | CT       | 0.74 |
| <i>ccmB</i> | 596 | C | 2 | 3046 | 37.35 | [0, 331, 0, 2715]   | CT       | 0.89 |
| <i>ccmB</i> | 611 | C | 2 | 2794 | 37.02 | [0, 269, 0, 2525]   | CT       | 0.9  |
| <i>ccmC</i> | 76  | C | 2 | 2072 | 37.65 | [2, 121, 0, 1949]   | CT CA    | 0.94 |
| <i>ccmC</i> | 103 | C | 2 | 2288 | 37.63 | [0, 407, 0, 1881]   | CT       | 0.82 |
| <i>ccmC</i> | 115 | C | 2 | 2485 | 37.61 | [1, 198, 1, 2285]   | CT CA CG | 0.92 |

|              |     |   |   |      |       |                    |          |      |
|--------------|-----|---|---|------|-------|--------------------|----------|------|
| <i>ccmC</i>  | 161 | C | 2 | 2850 | 37.58 | [2, 411, 0, 2437]  | CT CA    | 0.86 |
| <i>ccmC</i>  | 179 | C | 2 | 2838 | 37.53 | [5, 91, 0, 2742]   | CT CA    | 0.97 |
| <i>ccmC</i>  | 184 | C | 2 | 2791 | 37.52 | [0, 142, 1, 2648]  | CT CG    | 0.95 |
| <i>ccmC</i>  | 331 | C | 2 | 3350 | 37.45 | [6, 329, 4, 3011]  | CT CA CG | 0.9  |
| <i>ccmC</i>  | 395 | C | 2 | 5199 | 37.52 | [0, 1497, 0, 3702] | CT       | 0.71 |
| <i>ccmC</i>  | 399 | C | 2 | 5338 | 37.36 | [0, 1781, 0, 3557] | CT       | 0.67 |
| <i>ccmC</i>  | 436 | C | 2 | 6624 | 37.6  | [1, 79, 0, 6544]   | CT CA    | 0.99 |
| <i>ccmC</i>  | 446 | C | 2 | 6809 | 37.69 | [3, 404, 2, 6400]  | CT CA CG | 0.94 |
| <i>ccmC</i>  | 458 | C | 2 | 7089 | 37.73 | [1, 351, 0, 6737]  | CT CA    | 0.95 |
| <i>ccmC</i>  | 463 | C | 2 | 7284 | 37.74 | [3, 596, 1, 6684]  | CT CA CG | 0.92 |
| <i>ccmC</i>  | 473 | C | 2 | 7517 | 37.69 | [0, 448, 2, 7067]  | CT CG    | 0.94 |
| <i>ccmC</i>  | 497 | C | 2 | 7410 | 37.44 | [3, 271, 0, 7136]  | CT CA    | 0.96 |
| <i>ccmC</i>  | 521 | C | 2 | 6534 | 37.67 | [0, 300, 0, 6234]  | CT       | 0.95 |
| <i>ccmC</i>  | 548 | C | 2 | 5975 | 37.39 | [7, 305, 1, 5662]  | CT CA CG | 0.95 |
| <i>ccmC</i>  | 568 | C | 2 | 6175 | 37.25 | [1, 160, 0, 6014]  | CT CA    | 0.97 |
| <i>ccmC</i>  | 575 | C | 2 | 6137 | 37.2  | [5, 349, 0, 5783]  | CT CA    | 0.94 |
| <i>ccmC</i>  | 605 | C | 2 | 5141 | 37.11 | [0, 458, 2, 4681]  | CT CG    | 0.91 |
| <i>ccmC</i>  | 608 | C | 2 | 5184 | 37.38 | [5, 54, 0, 5125]   | CT CA    | 0.99 |
| <i>ccmC</i>  | 614 | C | 2 | 5000 | 37.75 | [0, 115, 0, 4885]  | CT       | 0.98 |
| <i>ccmC</i>  | 618 | C | 2 | 4513 | 36.83 | [0, 3869, 1, 643]  | CT CG    | 0.14 |
| <i>ccmC</i>  | 619 | C | 2 | 4782 | 37.68 | [3, 92, 1, 4686]   | CT CA CG | 0.98 |
| <i>ccmC</i>  | 624 | C | 2 | 4275 | 37.05 | [0, 2122, 0, 2153] | CT       | 0.5  |
| <i>ccmC</i>  | 650 | C | 2 | 3175 | 37.5  | [0, 255, 1, 2919]  | CT CG    | 0.92 |
| <i>ccmC</i>  | 665 | C | 2 | 2904 | 37.21 | [0, 55, 0, 2849]   | CT       | 0.98 |
| <i>ccmFC</i> | 38  | C | 2 | 716  | 37.54 | [0, 66, 0, 650]    | CT       | 0.91 |
| <i>ccmFC</i> | 39  | C | 2 | 717  | 37.42 | [0, 490, 0, 227]   | CT       | 0.32 |
| <i>ccmFC</i> | 50  | C | 2 | 743  | 37.39 | [0, 95, 0, 648]    | CT       | 0.87 |
| <i>ccmFC</i> | 52  | C | 2 | 749  | 37.59 | [0, 100, 0, 649]   | CT       | 0.87 |
| <i>ccmFC</i> | 103 | C | 2 | 815  | 37.42 | [0, 62, 0, 753]    | CT       | 0.92 |
| <i>ccmFC</i> | 119 | C | 2 | 840  | 37.52 | [1, 93, 0, 746]    | CT CA    | 0.89 |
| <i>ccmFC</i> | 122 | C | 2 | 838  | 37.53 | [0, 77, 0, 761]    | CT       | 0.91 |
| <i>ccmFC</i> | 146 | C | 2 | 836  | 37.62 | [0, 64, 0, 772]    | CT       | 0.92 |
| <i>ccmFC</i> | 151 | C | 2 | 822  | 37.55 | [1, 27, 0, 794]    | CT CA    | 0.97 |
| <i>ccmFC</i> | 155 | C | 2 | 901  | 37.58 | [0, 282, 0, 619]   | CT       | 0.69 |



|              |      |   |   |      |       |                   |       |      |
|--------------|------|---|---|------|-------|-------------------|-------|------|
| <i>ccmFC</i> | 160  | C | 2 | 914  | 37.53 | [1, 59, 0, 854]   | CT CA | 0.94 |
| <i>ccmFC</i> | 192  | C | 2 | 1003 | 37.3  | [0, 896, 0, 107]  | CT    | 0.11 |
| <i>ccmFC</i> | 305  | C | 2 | 1049 | 37.35 | [3, 331, 0, 715]  | CT CA | 0.68 |
| <i>ccmFC</i> | 310  | C | 2 | 1140 | 37.63 | [0, 143, 0, 997]  | CT    | 0.87 |
| <i>ccmFC</i> | 391  | C | 2 | 1191 | 37.52 | [1, 82, 0, 1108]  | CT CA | 0.93 |
| <i>ccmFC</i> | 406  | C | 2 | 1279 | 37.72 | [0, 78, 0, 1201]  | CT    | 0.94 |
| <i>ccmFC</i> | 412  | C | 2 | 1251 | 37.3  | [0, 301, 0, 950]  | CT    | 0.76 |
| <i>ccmFC</i> | 706  | C | 2 | 1152 | 36.91 | [0, 200, 0, 952]  | CT    | 0.83 |
| <i>ccmFC</i> | 878  | C | 2 | 1877 | 37.59 | [2, 166, 0, 1709] | CT CA | 0.91 |
| <i>ccmFC</i> | 1142 | C | 2 | 1670 | 37.72 | [0, 55, 0, 1615]  | CT    | 0.97 |
| <i>ccmFC</i> | 1163 | C | 2 | 1455 | 37.67 | [0, 85, 0, 1370]  | CT    | 0.94 |
| <i>ccmFC</i> | 1237 | C | 2 | 1408 | 37.69 | [1, 25, 0, 1382]  | CT CA | 0.98 |
| <i>ccmFC</i> | 1271 | C | 2 | 983  | 37.06 | [0, 324, 0, 659]  | CT    | 0.67 |
| <i>ccmFC</i> | 1318 | C | 2 | 757  | 37.53 | [0, 13, 0, 744]   | CT    | 0.98 |
| <i>ccmFN</i> | 38   | C | 2 | 347  | 37.69 | [0, 61, 0, 286]   | CT    | 0.82 |
| <i>ccmFN</i> | 98   | C | 2 | 364  | 37.36 | [0, 67, 0, 297]   | CT    | 0.82 |
| <i>ccmFN</i> | 137  | C | 2 | 306  | 37.75 | [0, 26, 0, 280]   | CT    | 0.92 |
| <i>ccmFN</i> | 142  | C | 2 | 305  | 37.71 | [0, 37, 0, 268]   | CT    | 0.88 |
| <i>ccmFN</i> | 151  | C | 2 | 292  | 37.5  | [0, 32, 0, 260]   | CT    | 0.89 |
| <i>ccmFN</i> | 248  | C | 2 | 268  | 37.67 | [0, 17, 0, 251]   | CT    | 0.94 |
| <i>ccmFN</i> | 256  | C | 2 | 286  | 37.38 | [0, 30, 0, 256]   | CT    | 0.9  |
| <i>ccmFN</i> | 263  | C | 2 | 307  | 37.6  | [0, 30, 0, 277]   | CT    | 0.9  |
| <i>ccmFN</i> | 279  | C | 2 | 335  | 37.39 | [0, 32, 0, 303]   | CT    | 0.9  |
| <i>ccmFN</i> | 283  | C | 2 | 332  | 37.46 | [0, 36, 0, 296]   | CT    | 0.89 |
| <i>ccmFN</i> | 372  | C | 2 | 512  | 37.63 | [0, 91, 0, 421]   | CT    | 0.82 |
| <i>ccmFN</i> | 400  | C | 2 | 526  | 37.35 | [1, 437, 0, 88]   | CT CA | 0.17 |
| <i>ccmFN</i> | 559  | C | 2 | 485  | 37.12 | [0, 431, 0, 54]   | CT    | 0.11 |
| <i>ccmFN</i> | 605  | C | 2 | 492  | 37.07 | [8, 378, 0, 106]  | CT CA | 0.22 |
| <i>ccmFN</i> | 607  | C | 2 | 502  | 37.65 | [0, 80, 0, 422]   | CT    | 0.84 |
| <i>ccmFN</i> | 707  | C | 2 | 424  | 37.31 | [1, 34, 0, 389]   | CT CA | 0.92 |
| <i>ccmFN</i> | 716  | C | 2 | 426  | 37.61 | [0, 51, 0, 375]   | CT    | 0.88 |
| <i>ccmFN</i> | 747  | C | 2 | 391  | 36.92 | [0, 345, 0, 46]   | CT    | 0.12 |
| <i>ccmFN</i> | 754  | C | 2 | 411  | 37.55 | [0, 32, 0, 379]   | CT    | 0.92 |
| <i>ccmFN</i> | 759  | C | 2 | 412  | 37.24 | [0, 311, 0, 101]  | CT    | 0.25 |

|              |      |   |   |       |       |                     |          |      |
|--------------|------|---|---|-------|-------|---------------------|----------|------|
| <i>ccmFN</i> | 776  | C | 2 | 356   | 37.62 | [0, 26, 0, 330]     | CT       | 0.93 |
| <i>ccmFN</i> | 788  | C | 2 | 340   | 37.59 | [0, 20, 0, 320]     | CT       | 0.94 |
| <i>ccmFN</i> | 803  | C | 2 | 350   | 37.72 | [0, 13, 0, 337]     | CT       | 0.96 |
| <i>ccmFN</i> | 952  | C | 2 | 359   | 37.59 | [0, 18, 0, 341]     | CT       | 0.95 |
| <i>ccmFN</i> | 1187 | C | 2 | 303   | 37.43 | [0, 29, 0, 274]     | CT       | 0.9  |
| <i>ccmFN</i> | 1270 | C | 2 | 295   | 37.41 | [0, 23, 0, 272]     | CT       | 0.92 |
| <i>ccmFN</i> | 1298 | C | 2 | 291   | 37.16 | [0, 31, 0, 260]     | CT       | 0.89 |
| <i>ccmFN</i> | 1315 | C | 2 | 307   | 37.35 | [1, 24, 0, 282]     | CT CA    | 0.92 |
| <i>ccmFN</i> | 1330 | C | 2 | 320   | 37.17 | [2, 27, 0, 291]     | CT CA    | 0.92 |
| <i>ccmFN</i> | 1348 | C | 2 | 414   | 37.33 | [0, 28, 0, 386]     | CT       | 0.93 |
| <i>ccmFN</i> | 1381 | C | 2 | 444   | 37.61 | [1, 25, 0, 418]     | CT CA    | 0.94 |
| <i>ccmFN</i> | 1399 | C | 2 | 524   | 37.64 | [0, 26, 0, 498]     | CT       | 0.95 |
| <i>ccmFN</i> | 1442 | C | 2 | 484   | 37.66 | [1, 33, 0, 450]     | CT CA    | 0.93 |
| <i>ccmFN</i> | 1462 | C | 2 | 450   | 37.54 | [0, 16, 0, 434]     | CT       | 0.96 |
| <i>ccmFN</i> | 1490 | C | 2 | 442   | 37.41 | [0, 347, 0, 95]     | CT       | 0.21 |
| <i>cob</i>   | 180  | C | 2 | 5690  | 37.21 | [0, 4760, 0, 930]   | CT       | 0.16 |
| <i>cob</i>   | 286  | C | 2 | 6254  | 37.46 | [1, 123, 0, 6130]   | CT CA    | 0.98 |
| <i>cob</i>   | 298  | C | 2 | 6551  | 37.44 | [0, 143, 0, 6408]   | CT       | 0.98 |
| <i>cob</i>   | 325  | C | 2 | 6929  | 37.65 | [0, 109, 0, 6820]   | CT       | 0.98 |
| <i>cob</i>   | 358  | C | 2 | 7334  | 37.63 | [0, 97, 4, 7233]    | CT CG    | 0.99 |
| <i>cob</i>   | 407  | C | 2 | 8357  | 37.64 | [1, 92, 0, 8264]    | CT CA    | 0.99 |
| <i>cob</i>   | 568  | C | 2 | 7129  | 37.66 | [1, 106, 0, 7022]   | CT CA    | 0.99 |
| <i>cob</i>   | 853  | C | 2 | 8166  | 37.61 | [10, 116, 2, 8038]  | CT CA CG | 0.99 |
| <i>cob</i>   | 907  | C | 2 | 6485  | 36.93 | [0, 5542, 3, 940]   | CT CG    | 0.15 |
| <i>cob</i>   | 908  | C | 2 | 6730  | 37.64 | [15, 142, 3, 6570]  | CT CA CG | 0.98 |
| <i>cob</i>   | 982  | C | 2 | 8367  | 37.56 | [1, 290, 1, 8075]   | CT CA CG | 0.97 |
| <i>cob</i>   | 1084 | C | 2 | 10625 | 37.47 | [1, 58, 0, 10566]   | CT CA    | 0.99 |
| <i>cob</i>   | 1406 | C | 2 | 13394 | 37.52 | [24, 3589, 3, 9778] | CT CA CG | 0.73 |
| <i>coxI</i>  | 11   | C | 2 | 9820  | 37.63 | [1, 913, 0, 8906]   | CT CA    | 0.91 |
| <i>coxI</i>  | 15   | C | 2 | 9183  | 36.88 | [0, 7106, 1, 2076]  | CT CG    | 0.23 |
| <i>coxI</i>  | 242  | C | 2 | 15508 | 37.44 | [3, 457, 4, 15044]  | CT CG CA | 0.97 |
| <i>coxI</i>  | 254  | C | 2 | 16255 | 37.41 | [2, 479, 1, 15773]  | CT CA CG | 0.97 |
| <i>coxI</i>  | 265  | C | 2 | 16916 | 37.34 | [0, 8480, 0, 8436]  | CT       | 0.5  |
| <i>coxI</i>  | 352  | C | 2 | 20093 | 37.48 | [4, 349, 0, 19740]  | CT CA    | 0.98 |

|             |      |   |   |       |       |                      |          |      |
|-------------|------|---|---|-------|-------|----------------------|----------|------|
| <i>cox1</i> | 443  | C | 2 | 23986 | 37.63 | [3, 173, 0, 23810]   | CT CA    | 0.99 |
| <i>cox1</i> | 452  | C | 2 | 23732 | 37.51 | [1, 262, 0, 23469]   | CT CA    | 0.99 |
| <i>cox1</i> | 515  | C | 2 | 23664 | 37.19 | [4, 294, 3, 23363]   | CT CA CG | 0.99 |
| <i>cox1</i> | 551  | C | 2 | 26188 | 37.55 | [3, 334, 0, 25851]   | CT CA    | 0.99 |
| <i>cox1</i> | 575  | C | 2 | 21734 | 37.67 | [2, 236, 1, 21495]   | CT CA CG | 0.99 |
| <i>cox1</i> | 590  | C | 2 | 22173 | 37.73 | [7, 235, 3, 21928]   | CT CA CG | 0.99 |
| <i>cox1</i> | 668  | C | 2 | 22397 | 37.54 | [2, 255, 1, 22139]   | CT CA CG | 0.99 |
| <i>cox1</i> | 715  | C | 2 | 20192 | 37.73 | [1, 129, 3, 20059]   | CT CG CA | 0.99 |
| <i>cox1</i> | 746  | C | 2 | 22428 | 37.58 | [0, 112, 2, 22314]   | CT CG    | 1    |
| <i>cox1</i> | 761  | C | 2 | 21269 | 37.48 | [7, 263, 0, 20999]   | CT CA    | 0.99 |
| <i>cox1</i> | 1037 | C | 2 | 18592 | 36.93 | [27, 151, 13, 18401] | CT CA CG | 0.99 |
| <i>cox1</i> | 1079 | C | 2 | 20703 | 37.01 | [8, 194, 2, 20499]   | CT CA CG | 0.99 |
| <i>cox1</i> | 1186 | C | 2 | 22813 | 37.49 | [0, 349, 0, 22464]   | CT       | 0.98 |
| <i>cox1</i> | 1274 | C | 2 | 24623 | 37.65 | [2, 136, 2, 24483]   | CT CA CG | 0.99 |
| <i>cox1</i> | 1279 | C | 2 | 24615 | 37.39 | [7, 92, 3, 24513]    | CT CA CG | 1    |
| <i>cox1</i> | 1402 | C | 2 | 27865 | 37.73 | [2, 135, 2, 27726]   | CT CG CA | 1    |
| <i>cox1</i> | 1433 | C | 2 | 24626 | 37.71 | [2, 334, 3, 24287]   | CT CG CA | 0.99 |
| <i>cox2</i> | 27   | C | 2 | 7056  | 37.48 | [0, 2894, 0, 4162]   | CT       | 0.59 |
| <i>cox2</i> | 38   | C | 2 | 7606  | 37.42 | [0, 462, 0, 7144]    | CT       | 0.94 |
| <i>cox2</i> | 71   | C | 2 | 9553  | 37.4  | [2, 116, 0, 9435]    | CT CA    | 0.99 |
| <i>cox2</i> | 161  | C | 2 | 10373 | 37.68 | [2, 113, 0, 10258]   | CT CA    | 0.99 |
| <i>cox2</i> | 163  | C | 2 | 10535 | 37.64 | [0, 112, 0, 10423]   | CT       | 0.99 |
| <i>cox2</i> | 253  | C | 2 | 13417 | 37.68 | [3, 184, 2, 13228]   | CT CA CG | 0.99 |
| <i>cox2</i> | 278  | C | 2 | 14182 | 37.72 | [9, 198, 5, 13970]   | CT CA CG | 0.99 |
| <i>cox2</i> | 379  | C | 2 | 12644 | 37.63 | [2, 131, 1, 12510]   | CT CA CG | 0.99 |
| <i>cox2</i> | 443  | C | 2 | 13566 | 37.69 | [2, 417, 0, 13147]   | CT CA    | 0.97 |
| <i>cox2</i> | 476  | C | 2 | 14441 | 37.65 | [0, 163, 0, 14278]   | CT       | 0.99 |
| <i>cox2</i> | 544  | C | 2 | 14740 | 37.43 | [2, 153, 0, 14585]   | CT CA    | 0.99 |
| <i>cox2</i> | 557  | C | 2 | 15745 | 37.56 | [1, 227, 1, 15516]   | CT CG CA | 0.99 |
| <i>cox2</i> | 581  | C | 2 | 14623 | 37.72 | [1, 329, 1, 14292]   | CT CA CG | 0.98 |
| <i>cox2</i> | 632  | C | 2 | 13618 | 37.74 | [0, 96, 1, 13521]    | CT CG    | 0.99 |
| <i>cox2</i> | 698  | C | 2 | 11443 | 37.61 | [4, 75, 4, 11360]    | CT CA CG | 0.99 |
| <i>cox2</i> | 721  | C | 2 | 9510  | 37.09 | [0, 112, 0, 9398]    | CT       | 0.99 |
| <i>cox2</i> | 742  | C | 2 | 8889  | 37.61 | [1, 31, 0, 8857]     | CT CA    | 1    |

|             |      |   |   |       |       |                      |          |      |
|-------------|------|---|---|-------|-------|----------------------|----------|------|
| <i>cox3</i> | 112  | C | 2 | 10676 | 37.44 | [6, 216, 4, 10450]   | CT CA CG | 0.98 |
| <i>cox3</i> | 270  | C | 2 | 8382  | 36.74 | [1, 7003, 0, 1378]   | CT CA    | 0.16 |
| <i>cox3</i> | 304  | C | 2 | 8469  | 37.52 | [2, 202, 4, 8261]    | CT CG CA | 0.98 |
| <i>cox3</i> | 311  | C | 2 | 8316  | 37.16 | [4, 158, 1, 8153]    | CT CA CG | 0.98 |
| <i>cox3</i> | 413  | C | 2 | 9508  | 37.41 | [39, 156, 21, 9292]  | CT CA CG | 0.98 |
| <i>cox3</i> | 512  | C | 2 | 13656 | 37.68 | [1, 317, 0, 13338]   | CT CA    | 0.98 |
| <i>cox3</i> | 565  | C | 2 | 13581 | 37.6  | [43, 148, 17, 13373] | CT CA CG | 0.99 |
| <i>cox3</i> | 566  | C | 2 | 13344 | 37.58 | [10, 129, 4, 13201]  | CT CA CG | 0.99 |
| <i>cox3</i> | 653  | C | 2 | 12641 | 37.78 | [1, 55, 0, 12585]    | CT CA    | 1    |
| <i>cox3</i> | 754  | C | 2 | 3163  | 37.44 | [0, 35, 0, 3128]     | CT       | 0.99 |
| <i>matR</i> | 32   | C | 2 | 1502  | 37.3  | [0, 339, 0, 1163]    | CT       | 0.77 |
| <i>matR</i> | 43   | C | 2 | 1665  | 37.08 | [0, 412, 0, 1253]    | CT       | 0.75 |
| <i>matR</i> | 147  | C | 2 | 2009  | 37.19 | [0, 1668, 0, 341]    | CT       | 0.17 |
| <i>matR</i> | 193  | C | 2 | 1960  | 37.26 | [1, 386, 1, 1572]    | CT CA CG | 0.8  |
| <i>matR</i> | 413  | C | 2 | 1944  | 37.49 | [0, 474, 0, 1470]    | CT       | 0.76 |
| <i>matR</i> | 923  | C | 2 | 2484  | 37.62 | [1, 257, 1, 2225]    | CT CA CG | 0.9  |
| <i>matR</i> | 1545 | C | 2 | 3168  | 37.34 | [0, 2459, 1, 708]    | CT CG    | 0.22 |
| <i>matR</i> | 1679 | C | 2 | 4487  | 36.92 | [0, 1328, 0, 3159]   | CT       | 0.7  |
| <i>matR</i> | 1700 | C | 2 | 4855  | 37.39 | [0, 712, 0, 4143]    | CT       | 0.85 |
| <i>matR</i> | 1734 | C | 2 | 4427  | 37.32 | [2, 357, 0, 4068]    | CT CA    | 0.92 |
| <i>matR</i> | 1756 | C | 2 | 4419  | 37.48 | [4, 891, 3, 3521]    | CT CA CG | 0.8  |
| <i>matR</i> | 1844 | C | 2 | 3013  | 37.64 | [2, 147, 0, 2864]    | CT CA    | 0.95 |
| <i>matR</i> | 1875 | C | 2 | 2858  | 36.77 | [0, 2503, 1, 354]    | CT CG    | 0.12 |
| <i>mttB</i> | 27   | C | 2 | 4698  | 37.05 | [0, 4139, 0, 559]    | CT       | 0.12 |
| <i>mttB</i> | 37   | C | 2 | 5204  | 37.48 | [0, 1688, 0, 3516]   | CT       | 0.68 |
| <i>mttB</i> | 84   | C | 2 | 5903  | 37.16 | [0, 1332, 0, 4571]   | CT       | 0.77 |
| <i>mttB</i> | 85   | C | 2 | 5834  | 37.05 | [0, 766, 0, 5068]    | CT       | 0.87 |
| <i>mttB</i> | 101  | C | 2 | 6012  | 37.4  | [0, 1954, 0, 4058]   | CT       | 0.67 |
| <i>mttB</i> | 104  | C | 2 | 6051  | 37.63 | [1, 1650, 0, 4400]   | CT CA    | 0.73 |
| <i>mttB</i> | 161  | C | 2 | 4849  | 37.62 | [0, 743, 1, 4105]    | CT CG    | 0.85 |
| <i>mttB</i> | 175  | C | 2 | 4316  | 36.96 | [1, 1521, 0, 2794]   | CT CA    | 0.65 |
| <i>mttB</i> | 235  | C | 2 | 2238  | 37.47 | [1, 687, 0, 1550]    | CT CA    | 0.69 |
| <i>mttB</i> | 304  | C | 2 | 2432  | 37.68 | [0, 237, 0, 2195]    | CT       | 0.9  |
| <i>mttB</i> | 317  | C | 2 | 2337  | 37.04 | [0, 516, 0, 1821]    | CT       | 0.78 |

|             |     |   |   |       |       |                     |          |      |
|-------------|-----|---|---|-------|-------|---------------------|----------|------|
| <i>mttB</i> | 346 | C | 2 | 1967  | 37.08 | [0, 713, 0, 1254]   | CT       | 0.64 |
| <i>mttB</i> | 347 | C | 2 | 1979  | 37.23 | [0, 440, 0, 1539]   | CT       | 0.78 |
| <i>mttB</i> | 349 | C | 2 | 2019  | 37.38 | [1, 111, 0, 1907]   | CT CA    | 0.94 |
| <i>mttB</i> | 352 | C | 2 | 2058  | 37.35 | [0, 936, 0, 1122]   | CT       | 0.55 |
| <i>mttB</i> | 380 | C | 2 | 2331  | 37.67 | [0, 262, 0, 2069]   | CT       | 0.89 |
| <i>mttB</i> | 410 | C | 2 | 2099  | 37.54 | [2, 162, 0, 1935]   | CT CA    | 0.92 |
| <i>mttB</i> | 470 | C | 2 | 2328  | 37.58 | [0, 340, 0, 1988]   | CT       | 0.85 |
| <i>mttB</i> | 478 | C | 2 | 2292  | 37.13 | [0, 749, 0, 1543]   | CT       | 0.67 |
| <i>mttB</i> | 521 | C | 2 | 2271  | 37.41 | [0, 900, 0, 1371]   | CT       | 0.6  |
| <i>mttB</i> | 527 | C | 2 | 2341  | 37.43 | [0, 269, 1, 2071]   | CT CG    | 0.89 |
| <i>mttB</i> | 583 | C | 2 | 3163  | 37.28 | [2, 328, 0, 2833]   | CT CA    | 0.9  |
| <i>mttB</i> | 640 | C | 2 | 3489  | 37.48 | [1, 981, 0, 2507]   | CT CA    | 0.72 |
| <i>mttB</i> | 645 | C | 2 | 3250  | 36.86 | [0, 2940, 0, 310]   | CT       | 0.1  |
| <i>mttB</i> | 681 | C | 2 | 3410  | 37.09 | [0, 2275, 0, 1135]  | CT       | 0.33 |
| <i>mttB</i> | 686 | C | 2 | 3479  | 37.34 | [0, 1447, 1, 2031]  | CT CG    | 0.58 |
| <i>nadI</i> | 2   | C | 2 | 10353 | 37.37 | [2, 4644, 0, 5707]  | CT CA    | 0.55 |
| <i>nadI</i> | 167 | C | 2 | 9179  | 37.59 | [0, 104, 0, 9075]   | CT       | 0.99 |
| <i>nadI</i> | 215 | C | 2 | 12030 | 37.5  | [0, 153, 0, 11877]  | CT       | 0.99 |
| <i>nadI</i> | 265 | C | 2 | 11271 | 37.4  | [5, 1055, 3, 10208] | CT CA CG | 0.91 |
| <i>nadI</i> | 307 | C | 2 | 11309 | 37.31 | [1, 561, 1, 10746]  | CT CG CA | 0.95 |
| <i>nadI</i> | 308 | C | 2 | 11489 | 37.57 | [0, 723, 0, 10766]  | CT       | 0.94 |
| <i>nadI</i> | 312 | C | 2 | 11549 | 37.22 | [1, 10207, 1, 1340] | CT CG CA | 0.12 |
| <i>nadI</i> | 336 | C | 2 | 9382  | 37.42 | [1, 4575, 0, 4806]  | CT CA    | 0.51 |
| <i>nadI</i> | 368 | C | 2 | 9148  | 37.6  | [0, 262, 0, 8886]   | CT       | 0.97 |
| <i>nadI</i> | 376 | C | 2 | 9096  | 37.45 | [12, 309, 7, 8768]  | CT CA CG | 0.97 |
| <i>nadI</i> | 490 | C | 2 | 6263  | 37.15 | [2, 109, 2, 6150]   | CT CA CG | 0.98 |
| <i>nadI</i> | 492 | C | 2 | 6226  | 37.4  | [1, 387, 1, 5837]   | CT CG CA | 0.94 |
| <i>nadI</i> | 493 | C | 2 | 6425  | 37.66 | [0, 177, 3, 6245]   | CT CG    | 0.97 |
| <i>nadI</i> | 500 | C | 2 | 7109  | 37.67 | [0, 231, 0, 6878]   | CT       | 0.97 |
| <i>nadI</i> | 536 | C | 2 | 7923  | 37.13 | [1, 163, 0, 7759]   | CT CA    | 0.98 |
| <i>nadI</i> | 573 | C | 2 | 8416  | 37.71 | [1, 205, 0, 8210]   | CT CA    | 0.98 |
| <i>nadI</i> | 580 | C | 2 | 8563  | 37.71 | [1, 129, 0, 8433]   | CT CA    | 0.98 |
| <i>nadI</i> | 635 | C | 2 | 9144  | 37.63 | [2, 207, 0, 8935]   | CT CA    | 0.98 |
| <i>nadI</i> | 674 | C | 2 | 8838  | 37.08 | [6, 367, 2, 8463]   | CT CA CG | 0.96 |

|             |      |   |   |       |       |                    |          |      |
|-------------|------|---|---|-------|-------|--------------------|----------|------|
| <i>nad1</i> | 734  | C | 2 | 13305 | 37.63 | [1, 97, 4, 13203]  | CT CG CA | 0.99 |
| <i>nad1</i> | 740  | C | 2 | 12748 | 37.57 | [1, 140, 0, 12607] | CT CA    | 0.99 |
| <i>nad1</i> | 743  | C | 2 | 14243 | 37.72 | [1, 139, 0, 14103] | CT CA    | 0.99 |
| <i>nad1</i> | 755  | C | 2 | 15368 | 37.26 | [3, 174, 4, 15187] | CT CG CA | 0.99 |
| <i>nad1</i> | 823  | C | 2 | 11695 | 37.44 | [0, 253, 0, 11442] | CT       | 0.98 |
| <i>nad1</i> | 829  | C | 2 | 11285 | 37.18 | [0, 9808, 0, 1477] | CT       | 0.13 |
| <i>nad1</i> | 898  | C | 2 | 6648  | 37.23 | [12, 97, 8, 6531]  | CT CA CG | 0.99 |
| <i>nad1</i> | 909  | C | 2 | 6192  | 36.97 | [0, 3913, 3, 2276] | CT CG    | 0.37 |
| <i>nad1</i> | 928  | C | 2 | 5582  | 37.43 | [4, 171, 12, 5395] | CT CG CA | 0.97 |
| <i>nad1</i> | 937  | C | 2 | 5106  | 36.95 | [5, 54, 2, 5045]   | CT CA CG | 0.99 |
| <i>nad2</i> | 26   | C | 2 | 4687  | 37.47 | [1, 293, 0, 4393]  | CT CA    | 0.94 |
| <i>nad2</i> | 223  | C | 2 | 4280  | 37.47 | [0, 64, 0, 4216]   | CT       | 0.99 |
| <i>nad2</i> | 303  | C | 2 | 2595  | 36.94 | [0, 2305, 0, 290]  | CT       | 0.11 |
| <i>nad2</i> | 356  | C | 2 | 3285  | 37.64 | [0, 126, 0, 3159]  | CT       | 0.96 |
| <i>nad2</i> | 361  | C | 2 | 3232  | 37.42 | [1, 153, 0, 3078]  | CT CA    | 0.95 |
| <i>nad2</i> | 367  | C | 2 | 3275  | 37.55 | [2, 66, 2, 3205]   | CT CG CA | 0.98 |
| <i>nad2</i> | 394  | C | 2 | 2965  | 37.55 | [9, 73, 1, 2882]   | CT CA CG | 0.98 |
| <i>nad2</i> | 401  | C | 2 | 3077  | 37.57 | [0, 192, 0, 2885]  | CT       | 0.94 |
| <i>nad2</i> | 428  | C | 2 | 3300  | 37.31 | [0, 75, 2, 3223]   | CT CG    | 0.98 |
| <i>nad2</i> | 497  | C | 2 | 3305  | 37.53 | [0, 63, 2, 3240]   | CT CG    | 0.98 |
| <i>nad2</i> | 523  | C | 2 | 4315  | 37.49 | [0, 220, 0, 4095]  | CT       | 0.95 |
| <i>nad2</i> | 609  | C | 2 | 7142  | 37.61 | [1, 706, 1, 6434]  | CT CG CA | 0.9  |
| <i>nad2</i> | 788  | C | 2 | 5969  | 37.49 | [2, 31, 0, 5936]   | CT CA    | 0.99 |
| <i>nad2</i> | 800  | C | 2 | 6094  | 37.69 | [0, 43, 0, 6051]   | CT       | 0.99 |
| <i>nad2</i> | 809  | C | 2 | 5965  | 37.54 | [1, 37, 0, 5927]   | CT CA    | 0.99 |
| <i>nad2</i> | 920  | C | 2 | 5107  | 37.48 | [1, 70, 0, 5036]   | CT CA    | 0.99 |
| <i>nad2</i> | 928  | C | 2 | 5317  | 37.68 | [0, 92, 0, 5225]   | CT       | 0.98 |
| <i>nad2</i> | 958  | C | 2 | 5746  | 37.7  | [0, 38, 0, 5708]   | CT       | 0.99 |
| <i>nad2</i> | 962  | C | 2 | 5618  | 37.34 | [1, 346, 1, 5270]  | CT CG CA | 0.94 |
| <i>nad2</i> | 1025 | C | 2 | 5437  | 37.12 | [0, 4849, 0, 588]  | CT       | 0.11 |
| <i>nad2</i> | 1058 | C | 2 | 5418  | 37.62 | [1, 39, 0, 5378]   | CT CA    | 0.99 |
| <i>nad2</i> | 1127 | C | 2 | 5123  | 37.59 | [0, 248, 0, 4875]  | CT       | 0.95 |
| <i>nad2</i> | 1246 | C | 2 | 5432  | 37.04 | [1, 34, 0, 5397]   | CT CA    | 0.99 |
| <i>nad2</i> | 1298 | C | 2 | 6910  | 37.4  | [0, 23, 0, 6887]   | CT       | 1    |

|             |      |   |   |      |       |                    |          |      |
|-------------|------|---|---|------|-------|--------------------|----------|------|
| <i>nad2</i> | 1400 | C | 2 | 7328 | 37.42 | [2, 996, 0, 6330]  | CT CA    | 0.86 |
| <i>nad2</i> | 1403 | C | 2 | 7206 | 37.24 | [1, 378, 0, 6827]  | CT CA    | 0.95 |
| <i>nad2</i> | 1408 | C | 2 | 7195 | 37.49 | [0, 384, 0, 6811]  | CT       | 0.95 |
| <i>nad2</i> | 1416 | C | 2 | 7154 | 36.97 | [2, 735, 2, 6415]  | CT CG CA | 0.9  |
| <i>nad2</i> | 1457 | C | 2 | 5540 | 37.21 | [0, 44, 0, 5496]   | CT       | 0.99 |
| <i>nad3</i> | 5    | C | 2 | 2658 | 37.47 | [1, 543, 0, 2114]  | CT CA    | 0.8  |
| <i>nad3</i> | 39   | C | 2 | 2749 | 37.45 | [0, 878, 0, 1871]  | CT       | 0.68 |
| <i>nad3</i> | 44   | C | 2 | 2792 | 37.58 | [1, 341, 0, 2450]  | CT CA    | 0.88 |
| <i>nad3</i> | 80   | C | 2 | 2650 | 37.69 | [0, 292, 0, 2358]  | CT       | 0.89 |
| <i>nad3</i> | 146  | C | 2 | 2854 | 37.27 | [0, 363, 0, 2491]  | CT       | 0.87 |
| <i>nad3</i> | 208  | C | 2 | 2503 | 37.45 | [0, 346, 2, 2155]  | CT CG    | 0.86 |
| <i>nad3</i> | 209  | C | 2 | 2500 | 37.45 | [0, 309, 1, 2190]  | CT CG    | 0.88 |
| <i>nad3</i> | 215  | C | 2 | 2532 | 37.44 | [1, 453, 0, 2078]  | CT CA    | 0.82 |
| <i>nad3</i> | 247  | C | 2 | 2676 | 36.99 | [0, 488, 0, 2188]  | CT       | 0.82 |
| <i>nad3</i> | 251  | C | 2 | 2589 | 36.96 | [0, 470, 0, 2119]  | CT       | 0.82 |
| <i>nad3</i> | 266  | C | 2 | 2528 | 37.42 | [1, 666, 0, 1861]  | CT CA    | 0.74 |
| <i>nad3</i> | 275  | C | 2 | 2387 | 37.16 | [1, 459, 0, 1927]  | CT CA    | 0.81 |
| <i>nad3</i> | 317  | C | 2 | 1873 | 37.05 | [0, 281, 0, 1592]  | CT       | 0.85 |
| <i>nad3</i> | 344  | C | 2 | 1527 | 37.4  | [0, 259, 0, 1268]  | CT       | 0.83 |
| <i>nad3</i> | 349  | C | 2 | 1512 | 37.39 | [0, 346, 0, 1166]  | CT       | 0.77 |
| <i>nad4</i> | 29   | C | 2 | 3748 | 37.51 | [0, 408, 0, 3340]  | CT       | 0.89 |
| <i>nad4</i> | 74   | C | 2 | 3234 | 37.23 | [0, 1303, 0, 1931] | CT       | 0.6  |
| <i>nad4</i> | 77   | C | 2 | 3233 | 37.44 | [0, 193, 0, 3040]  | CT       | 0.94 |
| <i>nad4</i> | 84   | C | 2 | 3157 | 37.43 | [0, 1325, 0, 1832] | CT       | 0.58 |
| <i>nad4</i> | 107  | C | 2 | 3000 | 37.51 | [10, 144, 6, 2840] | CT CA CG | 0.95 |
| <i>nad4</i> | 154  | C | 2 | 2693 | 37.21 | [0, 109, 0, 2584]  | CT       | 0.96 |
| <i>nad4</i> | 164  | C | 2 | 2706 | 37.21 | [2, 129, 0, 2575]  | CT CA    | 0.95 |
| <i>nad4</i> | 166  | C | 2 | 2749 | 37.6  | [0, 180, 0, 2569]  | CT       | 0.93 |
| <i>nad4</i> | 197  | C | 2 | 1745 | 37.45 | [0, 84, 0, 1661]   | CT       | 0.95 |
| <i>nad4</i> | 261  | C | 2 | 1596 | 36.84 | [0, 1440, 0, 156]  | CT       | 0.1  |
| <i>nad4</i> | 303  | C | 2 | 1416 | 36.62 | [0, 1089, 0, 327]  | CT       | 0.23 |
| <i>nad4</i> | 362  | C | 2 | 2584 | 37.59 | [1, 129, 0, 2454]  | CT CA    | 0.95 |
| <i>nad4</i> | 368  | C | 2 | 2583 | 37.47 | [1, 77, 1, 2504]   | CT CA CG | 0.97 |
| <i>nad4</i> | 376  | C | 2 | 2661 | 37.67 | [0, 102, 0, 2559]  | CT       | 0.96 |

|              |      |   |   |      |       |                    |          |      |
|--------------|------|---|---|------|-------|--------------------|----------|------|
| <i>nad4</i>  | 403  | C | 2 | 2872 | 37.58 | [1, 139, 1, 2731]  | CT CA CG | 0.95 |
| <i>nad4</i>  | 416  | C | 2 | 2771 | 37.55 | [0, 145, 0, 2626]  | CT       | 0.95 |
| <i>nad4</i>  | 433  | C | 2 | 2686 | 37.5  | [0, 183, 0, 2503]  | CT       | 0.93 |
| <i>nad4</i>  | 436  | C | 2 | 2642 | 37.6  | [0, 91, 0, 2551]   | CT       | 0.97 |
| <i>nad4</i>  | 437  | C | 2 | 2651 | 37.51 | [0, 112, 0, 2539]  | CT       | 0.96 |
| <i>nad4</i>  | 449  | C | 2 | 3219 | 37.63 | [8, 108, 2, 3101]  | CT CA CG | 0.97 |
| <i>nad4</i>  | 608  | C | 2 | 5144 | 37.68 | [1, 83, 0, 5060]   | CT CA    | 0.98 |
| <i>nad4</i>  | 659  | C | 2 | 4894 | 37.39 | [0, 195, 0, 4699]  | CT       | 0.96 |
| <i>nad4</i>  | 767  | C | 2 | 5954 | 37.48 | [2, 124, 0, 5828]  | CT CA    | 0.98 |
| <i>nad4</i>  | 819  | C | 2 | 5533 | 37.18 | [0, 4724, 0, 809]  | CT       | 0.15 |
| <i>nad4</i>  | 836  | C | 2 | 4901 | 37.16 | [0, 96, 0, 4805]   | CT       | 0.98 |
| <i>nad4</i>  | 837  | C | 2 | 4813 | 37.21 | [0, 4269, 0, 544]  | CT       | 0.11 |
| <i>nad4</i>  | 857  | C | 2 | 4918 | 37.69 | [6, 136, 2, 4774]  | CT CA CG | 0.97 |
| <i>nad4</i>  | 896  | C | 2 | 4090 | 37.7  | [0, 80, 0, 4010]   | CT       | 0.98 |
| <i>nad4</i>  | 977  | C | 2 | 3660 | 37.52 | [0, 643, 21, 2996] | CT CG    | 0.82 |
| <i>nad4</i>  | 1006 | C | 2 | 3319 | 37.54 | [1, 280, 0, 3038]  | CT CA    | 0.92 |
| <i>nad4</i>  | 1007 | C | 2 | 3346 | 37.66 | [0, 163, 0, 3183]  | CT       | 0.95 |
| <i>nad4</i>  | 1009 | C | 2 | 3286 | 37.43 | [1, 212, 0, 3073]  | CT CA    | 0.94 |
| <i>nad4</i>  | 1010 | C | 2 | 3365 | 37.69 | [0, 288, 0, 3077]  | CT       | 0.91 |
| <i>nad4</i>  | 1101 | C | 2 | 5410 | 37.33 | [1, 1994, 0, 3415] | CT CA    | 0.63 |
| <i>nad4</i>  | 1109 | C | 2 | 5406 | 37.55 | [0, 223, 0, 5183]  | CT       | 0.96 |
| <i>nad4</i>  | 1129 | C | 2 | 5465 | 37.22 | [1, 161, 1, 5302]  | CT CG CA | 0.97 |
| <i>nad4</i>  | 1132 | C | 2 | 5606 | 37.33 | [0, 155, 0, 5451]  | CT       | 0.97 |
| <i>nad4</i>  | 1142 | C | 2 | 5422 | 37.38 | [1, 186, 0, 5235]  | CT CA    | 0.97 |
| <i>nad4</i>  | 1148 | C | 2 | 5189 | 37.34 | [0, 332, 0, 4857]  | CT       | 0.94 |
| <i>nad4</i>  | 1151 | C | 2 | 5151 | 37.35 | [0, 246, 0, 4905]  | CT       | 0.95 |
| <i>nad4</i>  | 1172 | C | 2 | 5147 | 37.48 | [2, 112, 0, 5033]  | CT CA    | 0.98 |
| <i>nad4</i>  | 1194 | C | 2 | 4897 | 37.01 | [1, 4203, 0, 693]  | CT CA    | 0.14 |
| <i>nad4</i>  | 1205 | C | 2 | 5199 | 37.37 | [1, 151, 0, 5047]  | CT CA    | 0.97 |
| <i>nad4</i>  | 1355 | C | 2 | 5931 | 37.72 | [1, 48, 0, 5882]   | CT CA    | 0.99 |
| <i>nad4</i>  | 1373 | C | 2 | 6422 | 37.37 | [1, 142, 0, 6279]  | CT CA    | 0.98 |
| <i>nad4</i>  | 1417 | C | 2 | 4986 | 37.44 | [0, 93, 0, 4893]   | CT       | 0.98 |
| <i>nad4</i>  | 1433 | C | 2 | 4465 | 37.56 | [4, 182, 7, 4272]  | CT CG CA | 0.96 |
| <i>nad4L</i> | 8    | C | 2 | 5333 | 37.61 | [0, 1127, 0, 4206] | CT       | 0.79 |



|              |      |   |   |      |       |                    |          |      |
|--------------|------|---|---|------|-------|--------------------|----------|------|
| <i>nad4L</i> | 21   | C | 2 | 5350 | 37.32 | [0, 4776, 0, 574]  | CT       | 0.11 |
| <i>nad4L</i> | 41   | C | 2 | 5502 | 37.62 | [0, 528, 0, 4974]  | CT       | 0.9  |
| <i>nad4L</i> | 55   | C | 2 | 5077 | 37.61 | [5, 791, 3, 4278]  | CT CA CG | 0.84 |
| <i>nad4L</i> | 86   | C | 2 | 5229 | 37.59 | [1, 246, 0, 4982]  | CT CA    | 0.95 |
| <i>nad4L</i> | 95   | C | 2 | 5046 | 37.61 | [2, 436, 0, 4608]  | CT CA    | 0.91 |
| <i>nad4L</i> | 100  | C | 2 | 4812 | 37.11 | [0, 284, 0, 4528]  | CT       | 0.94 |
| <i>nad4L</i> | 110  | C | 2 | 5037 | 37.63 | [0, 469, 0, 4568]  | CT       | 0.91 |
| <i>nad4L</i> | 158  | C | 2 | 7013 | 37.68 | [1, 241, 0, 6771]  | CT CA    | 0.97 |
| <i>nad4L</i> | 179  | C | 2 | 7740 | 37.63 | [0, 248, 2, 7490]  | CT CG    | 0.97 |
| <i>nad4L</i> | 188  | C | 2 | 7805 | 37.58 | [0, 1311, 0, 6494] | CT       | 0.83 |
| <i>nad4L</i> | 196  | C | 2 | 7590 | 37.04 | [0, 5598, 0, 1992] | CT       | 0.26 |
| <i>nad4L</i> | 197  | C | 2 | 7949 | 37.56 | [2, 1460, 0, 6487] | CT CA    | 0.82 |
| <i>nad4L</i> | 281  | C | 2 | 8622 | 37.49 | [1, 202, 0, 8419]  | CT CA    | 0.98 |
| <i>nad5</i>  | 150  | C | 2 | 3300 | 36.97 | [0, 2732, 0, 568]  | CT       | 0.17 |
| <i>nad5</i>  | 155  | C | 2 | 3500 | 37.52 | [0, 406, 2, 3092]  | CT CG    | 0.88 |
| <i>nad5</i>  | 242  | C | 2 | 3226 | 37.45 | [1, 94, 1, 3130]   | CT CA CG | 0.97 |
| <i>nad5</i>  | 358  | C | 2 | 2524 | 37.54 | [1, 74, 1, 2448]   | CT CA CG | 0.97 |
| <i>nad5</i>  | 374  | C | 2 | 2624 | 37.66 | [0, 179, 0, 2445]  | CT       | 0.93 |
| <i>nad5</i>  | 398  | C | 2 | 2706 | 37.45 | [0, 127, 0, 2579]  | CT       | 0.95 |
| <i>nad5</i>  | 494  | C | 2 | 3936 | 37.58 | [2, 243, 0, 3691]  | CT CA    | 0.94 |
| <i>nad5</i>  | 506  | C | 2 | 4611 | 37.48 | [0, 239, 0, 4372]  | CT       | 0.95 |
| <i>nad5</i>  | 539  | C | 2 | 5153 | 37.53 | [1, 399, 1, 4752]  | CT CA CG | 0.92 |
| <i>nad5</i>  | 548  | C | 2 | 5332 | 37.66 | [0, 236, 1, 5095]  | CT CG    | 0.96 |
| <i>nad5</i>  | 553  | C | 2 | 5585 | 37.52 | [0, 405, 0, 5180]  | CT       | 0.93 |
| <i>nad5</i>  | 598  | C | 2 | 5587 | 37.61 | [2, 126, 1, 5458]  | CT CA CG | 0.98 |
| <i>nad5</i>  | 608  | C | 2 | 5708 | 37.03 | [1, 236, 1, 5470]  | CT CA CG | 0.96 |
| <i>nad5</i>  | 676  | C | 2 | 6759 | 37.59 | [0, 132, 0, 6627]  | CT       | 0.98 |
| <i>nad5</i>  | 713  | C | 2 | 7117 | 37.48 | [1, 262, 0, 6854]  | CT CA    | 0.96 |
| <i>nad5</i>  | 725  | C | 2 | 7170 | 37.46 | [3, 287, 3, 6877]  | CT CA CG | 0.96 |
| <i>nad5</i>  | 835  | C | 2 | 7294 | 37.37 | [1, 192, 0, 7101]  | CT CA    | 0.97 |
| <i>nad5</i>  | 863  | C | 2 | 6338 | 37.42 | [0, 240, 0, 6098]  | CT       | 0.96 |
| <i>nad5</i>  | 875  | C | 2 | 6421 | 37.59 | [3, 428, 1, 5989]  | CT CA CG | 0.93 |
| <i>nad5</i>  | 1048 | C | 2 | 4329 | 36.65 | [0, 3718, 0, 611]  | CT       | 0.14 |
| <i>nad5</i>  | 1400 | C | 2 | 4562 | 37.65 | [0, 175, 0, 4387]  | CT       | 0.96 |

|             |      |   |   |       |       |                    |          |      |
|-------------|------|---|---|-------|-------|--------------------|----------|------|
| <i>nad5</i> | 1490 | C | 2 | 6700  | 37.43 | [2, 227, 0, 6471]  | CT CA    | 0.97 |
| <i>nad5</i> | 1550 | C | 2 | 7760  | 37.3  | [1, 261, 1, 7497]  | CT CA CG | 0.97 |
| <i>nad5</i> | 1568 | C | 2 | 7429  | 37.71 | [0, 286, 0, 7143]  | CT       | 0.96 |
| <i>nad5</i> | 1580 | C | 2 | 7442  | 37.68 | [0, 350, 0, 7092]  | CT       | 0.95 |
| <i>nad5</i> | 1589 | C | 2 | 7563  | 37.54 | [1, 268, 0, 7294]  | CT CA    | 0.96 |
| <i>nad5</i> | 1610 | C | 2 | 8017  | 37.5  | [1, 399, 0, 7617]  | CT CA    | 0.95 |
| <i>nad5</i> | 1665 | C | 2 | 8771  | 37.2  | [6, 5814, 4, 2947] | CT CA CG | 0.34 |
| <i>nad5</i> | 1674 | C | 2 | 9753  | 36.84 | [2, 8682, 0, 1069] | CT CA    | 0.11 |
| <i>nad5</i> | 1916 | C | 2 | 6519  | 37.52 | [0, 192, 0, 6327]  | CT       | 0.97 |
| <i>nad5</i> | 1918 | C | 2 | 6525  | 37.71 | [0, 315, 1, 6209]  | CT CG    | 0.95 |
| <i>nad5</i> | 1929 | C | 2 | 5567  | 36.79 | [6, 4475, 9, 1077] | CT CG CA | 0.19 |
| <i>nad5</i> | 1958 | C | 2 | 5440  | 37.54 | [0, 104, 1, 5335]  | CT CG    | 0.98 |
| <i>nad6</i> | 26   | C | 2 | 7635  | 37.5  | [2, 323, 1, 7309]  | CT CA CG | 0.96 |
| <i>nad6</i> | 53   | C | 2 | 10207 | 37.42 | [0, 216, 0, 9991]  | CT       | 0.98 |
| <i>nad6</i> | 88   | C | 2 | 9545  | 37.51 | [1, 208, 0, 9336]  | CT CA    | 0.98 |
| <i>nad6</i> | 89   | C | 2 | 9535  | 37.5  | [1, 279, 0, 9255]  | CT CA    | 0.97 |
| <i>nad6</i> | 95   | C | 2 | 10275 | 37.73 | [2, 393, 6, 9874]  | CT CG CA | 0.96 |
| <i>nad6</i> | 103  | C | 2 | 10448 | 37.66 | [1, 489, 2, 9956]  | CT CG CA | 0.95 |
| <i>nad6</i> | 105  | C | 2 | 10048 | 37.13 | [0, 7100, 0, 2948] | CT       | 0.29 |
| <i>nad6</i> | 146  | C | 2 | 12532 | 37.48 | [0, 114, 1, 12417] | CT CG    | 0.99 |
| <i>nad6</i> | 159  | C | 2 | 11835 | 37.47 | [4, 373, 1, 11457] | CT CA CG | 0.97 |
| <i>nad6</i> | 161  | C | 2 | 11897 | 37.66 | [0, 1953, 0, 9944] | CT       | 0.84 |
| <i>nad6</i> | 191  | C | 2 | 10243 | 37.65 | [0, 40, 0, 10203]  | CT       | 1    |
| <i>nad6</i> | 288  | C | 2 | 13618 | 37.06 | [0, 7578, 2, 6038] | CT CG    | 0.44 |
| <i>nad6</i> | 289  | C | 2 | 14065 | 37.49 | [0, 69, 2, 13994]  | CT CG    | 1    |
| <i>nad6</i> | 446  | C | 2 | 12787 | 37.15 | [0, 50, 0, 12737]  | CT       | 1    |
| <i>nad7</i> | 38   | C | 2 | 4166  | 37.68 | [2, 398, 0, 3766]  | CT CA    | 0.9  |
| <i>nad7</i> | 77   | C | 2 | 3546  | 37.71 | [0, 187, 1, 3358]  | CT CG    | 0.95 |
| <i>nad7</i> | 83   | C | 2 | 3601  | 37.67 | [0, 155, 0, 3446]  | CT       | 0.96 |
| <i>nad7</i> | 200  | C | 2 | 2058  | 37.56 | [0, 113, 0, 1945]  | CT       | 0.95 |
| <i>nad7</i> | 224  | C | 2 | 3355  | 37.49 | [0, 1125, 0, 2230] | CT       | 0.66 |
| <i>nad7</i> | 244  | C | 2 | 3519  | 37.63 | [1, 102, 0, 3416]  | CT CA    | 0.97 |
| <i>nad7</i> | 251  | C | 2 | 3427  | 37.72 | [0, 102, 0, 3325]  | CT       | 0.97 |
| <i>nad7</i> | 316  | C | 2 | 3802  | 37.73 | [1, 85, 1, 3715]   | CT CA CG | 0.98 |

|              |      |   |   |       |       |                      |          |      |
|--------------|------|---|---|-------|-------|----------------------|----------|------|
| <i>nad7</i>  | 335  | C | 2 | 4508  | 37.6  | [0, 72, 0, 4436]     | CT       | 0.98 |
| <i>nad7</i>  | 344  | C | 2 | 4742  | 37.62 | [1, 109, 0, 4632]    | CT CA    | 0.98 |
| <i>nad7</i>  | 383  | C | 2 | 5521  | 37.56 | [1, 111, 0, 5409]    | CT CA    | 0.98 |
| <i>nad7</i>  | 533  | C | 2 | 9356  | 37.26 | [1, 264, 1, 9090]    | CT CG CA | 0.97 |
| <i>nad7</i>  | 578  | C | 2 | 8326  | 37.41 | [1, 122, 0, 8203]    | CT CA    | 0.99 |
| <i>nad7</i>  | 657  | C | 2 | 5815  | 37.28 | [1, 3998, 1, 1815]   | CT CG CA | 0.31 |
| <i>nad7</i>  | 679  | C | 2 | 5724  | 37.07 | [13, 500, 15, 5196]  | CT CG CA | 0.91 |
| <i>nad7</i>  | 698  | C | 2 | 6496  | 37.63 | [3, 354, 1, 6138]    | CT CA CG | 0.95 |
| <i>nad7</i>  | 724  | C | 2 | 6980  | 37.71 | [0, 98, 0, 6882]     | CT       | 0.99 |
| <i>nad7</i>  | 734  | C | 2 | 7032  | 37.74 | [2, 90, 2, 6938]     | CT CA CG | 0.99 |
| <i>nad7</i>  | 739  | C | 2 | 6999  | 37.6  | [2, 179, 0, 6818]    | CT CA    | 0.97 |
| <i>nad7</i>  | 769  | C | 2 | 8270  | 37.38 | [3, 214, 1, 8052]    | CT CA CG | 0.97 |
| <i>nad7</i>  | 789  | C | 2 | 8616  | 37.18 | [0, 1737, 0, 6879]   | CT       | 0.8  |
| <i>nad7</i>  | 926  | C | 2 | 8422  | 36.91 | [1, 1184, 1, 7236]   | CT CA CG | 0.86 |
| <i>nad7</i>  | 963  | C | 2 | 7765  | 36.91 | [0, 4628, 2, 3135]   | CT CG    | 0.4  |
| <i>nad7</i>  | 973  | C | 2 | 7791  | 37.11 | [1, 118, 0, 7672]    | CT CA    | 0.98 |
| <i>nad7</i>  | 1050 | C | 2 | 7174  | 37.18 | [17, 67, 3, 7087]    | CT CA CG | 0.99 |
| <i>nad7</i>  | 1057 | C | 2 | 6804  | 37.29 | [3, 71, 4, 6726]     | CT CG CA | 0.99 |
| <i>nad7</i>  | 1079 | C | 2 | 7969  | 36.61 | [4, 51, 5, 7909]     | CT CG CA | 0.99 |
| <i>nad7</i>  | 1088 | C | 2 | 8712  | 37.37 | [1, 257, 1, 8453]    | CT CG CA | 0.97 |
| <i>nad7</i>  | 1103 | C | 2 | 8104  | 37.2  | [0, 196, 0, 7908]    | CT       | 0.98 |
| <i>nad7</i>  | 1119 | C | 2 | 7508  | 37.24 | [1, 6570, 0, 937]    | CT CA    | 0.12 |
| <i>nad7</i>  | 1124 | C | 2 | 7004  | 37.37 | [13, 184, 9, 6798]   | CT CA CG | 0.97 |
| <i>nad7</i>  | 1137 | C | 2 | 5622  | 37.33 | [3, 1036, 1, 4582]   | CT CA CG | 0.82 |
| <i>nad7</i>  | 1166 | C | 2 | 4692  | 36.86 | [0, 31, 2, 4659]     | CT CG    | 0.99 |
| <i>nad9</i>  | 92   | C | 2 | 24420 | 37.4  | [2, 391, 0, 24027]   | CT CA    | 0.98 |
| <i>nad9</i>  | 113  | C | 2 | 20791 | 37.68 | [57, 415, 11, 20308] | CT CA CG | 0.98 |
| <i>nad9</i>  | 167  | C | 2 | 24499 | 37.66 | [1, 226, 0, 24272]   | CT CA    | 0.99 |
| <i>nad9</i>  | 190  | C | 2 | 23196 | 37.53 | [1, 399, 5, 22791]   | CT CG CA | 0.98 |
| <i>nad9</i>  | 328  | C | 2 | 22412 | 37.39 | [47, 216, 18, 22131] | CT CA CG | 0.99 |
| <i>nad9</i>  | 368  | C | 2 | 27811 | 37.44 | [5, 254, 0, 27552]   | CT CA    | 0.99 |
| <i>nad9</i>  | 398  | C | 2 | 27421 | 37.66 | [8, 614, 0, 26799]   | CT CA    | 0.98 |
| <i>nad9</i>  | 439  | C | 2 | 26264 | 37.21 | [8, 808, 5, 25443]   | CT CA CG | 0.97 |
| <i>rpl10</i> | 9    | C | 2 | 2164  | 37.5  | [1, 1124, 0, 1039]   | CT CA    | 0.48 |

|              |     |   |   |       |       |                     |          |      |
|--------------|-----|---|---|-------|-------|---------------------|----------|------|
| <i>rpl10</i> | 83  | C | 2 | 5685  | 37.66 | [1, 642, 0, 5042]   | CT CA    | 0.89 |
| <i>rpl10</i> | 101 | C | 2 | 6279  | 37.58 | [0, 612, 0, 5667]   | CT       | 0.9  |
| <i>rpl10</i> | 133 | C | 2 | 7300  | 37.4  | [2, 172, 0, 7126]   | CT CA    | 0.98 |
| <i>rpl10</i> | 134 | C | 2 | 7380  | 37.52 | [1, 277, 0, 7102]   | CT CA    | 0.96 |
| <i>rpl10</i> | 239 | C | 2 | 8493  | 37.68 | [0, 348, 0, 8145]   | CT       | 0.96 |
| <i>rpl10</i> | 314 | C | 2 | 9299  | 37.72 | [1, 94, 0, 9204]    | CT CA    | 0.99 |
| <i>rpl10</i> | 330 | C | 2 | 7465  | 37.26 | [0, 1785, 1, 5679]  | CT CG    | 0.76 |
| <i>rpl10</i> | 397 | C | 2 | 8612  | 37.06 | [0, 4012, 0, 4600]  | CT       | 0.53 |
| <i>rpl16</i> | 104 | C | 2 | 9117  | 37.38 | [5, 227, 0, 8885]   | CT CA    | 0.98 |
| <i>rpl16</i> | 141 | C | 2 | 10172 | 37.4  | [0, 9040, 1, 1131]  | CT CG    | 0.11 |
| <i>rpl16</i> | 164 | C | 2 | 9070  | 37.54 | [1, 2269, 0, 6800]  | CT CA    | 0.75 |
| <i>rpl16</i> | 174 | C | 2 | 7910  | 37.17 | [2, 4554, 0, 3354]  | CT CA    | 0.42 |
| <i>rpl16</i> | 232 | C | 2 | 5067  | 37.06 | [1, 1041, 0, 4025]  | CT CA    | 0.79 |
| <i>rpl16</i> | 401 | C | 2 | 4890  | 37.68 | [2, 801, 0, 4087]   | CT CA    | 0.84 |
| <i>rpl16</i> | 407 | C | 2 | 5233  | 37.59 | [2, 1560, 0, 3671]  | CT CA    | 0.7  |
| <i>rpl5</i>  | 7   | C | 2 | 2981  | 37.39 | [0, 891, 0, 2090]   | CT       | 0.7  |
| <i>rpl5</i>  | 35  | C | 2 | 3425  | 37.64 | [1, 476, 0, 2948]   | CT CA    | 0.86 |
| <i>rpl5</i>  | 59  | C | 2 | 4174  | 37.65 | [0, 603, 0, 3571]   | CT       | 0.86 |
| <i>rpl5</i>  | 92  | C | 2 | 4247  | 37.57 | [0, 503, 0, 3744]   | CT       | 0.88 |
| <i>rpl5</i>  | 335 | C | 2 | 4473  | 37.56 | [0, 1288, 0, 3185]  | CT       | 0.71 |
| <i>rpl5</i>  | 518 | C | 2 | 2930  | 37.56 | [0, 459, 0, 2471]   | CT       | 0.84 |
| <i>rps1</i>  | 209 | C | 2 | 1098  | 37.07 | [0, 55, 0, 1043]    | CT       | 0.95 |
| <i>rps1</i>  | 605 | C | 2 | 826   | 36.94 | [1, 38, 0, 787]     | CT CA    | 0.95 |
| <i>rps10</i> | 2   | C | 2 | 5858  | 37.37 | [11, 1383, 3, 4456] | CT CA CG | 0.76 |
| <i>rps10</i> | 238 | C | 2 | 5513  | 37.53 | [1, 1347, 0, 4165]  | CT CA    | 0.76 |
| <i>rps10</i> | 302 | C | 2 | 8266  | 37.39 | [0, 1690, 0, 6576]  | CT       | 0.8  |
| <i>rps10</i> | 331 | C | 2 | 8002  | 37.46 | [1, 251, 1, 7749]   | CT CG CA | 0.97 |
| <i>rps12</i> | 284 | C | 2 | 777   | 36.97 | [0, 223, 0, 554]    | CT       | 0.71 |
| <i>rps14</i> | 194 | C | 2 | 6133  | 37.27 | [0, 297, 0, 5836]   | CT       | 0.95 |
| <i>rps14</i> | 271 | C | 2 | 6573  | 37.12 | [0, 253, 0, 6320]   | CT       | 0.96 |
| <i>rps19</i> | 126 | C | 2 | 2241  | 37.27 | [0, 1619, 0, 622]   | CT       | 0.28 |
| <i>rps19</i> | 137 | C | 2 | 2201  | 37.2  | [0, 1646, 0, 555]   | CT       | 0.25 |
| <i>rps19</i> | 138 | C | 2 | 2253  | 37.52 | [0, 705, 0, 1548]   | CT       | 0.69 |
| <i>rps19</i> | 163 | C | 2 | 2087  | 37.28 | [0, 704, 0, 1383]   | CT       | 0.66 |

|              |      |   |   |       |       |                     |          |      |
|--------------|------|---|---|-------|-------|---------------------|----------|------|
| <i>rps19</i> | 164  | C | 2 | 2172  | 37.51 | [0, 196, 0, 1976]   | CT       | 0.91 |
| <i>rps19</i> | 260  | C | 2 | 1030  | 36.95 | [1, 914, 0, 115]    | CT CA    | 0.11 |
| <i>rps3</i>  | 26   | C | 2 | 872   | 37.5  | [0, 724, 0, 148]    | CT       | 0.17 |
| <i>rps3</i>  | 69   | C | 2 | 1015  | 37.52 | [0, 690, 0, 325]    | CT       | 0.32 |
| <i>rps3</i>  | 92   | C | 2 | 2722  | 37.68 | [0, 98, 0, 2624]    | CT       | 0.96 |
| <i>rps3</i>  | 96   | C | 2 | 2737  | 37.31 | [0, 2004, 0, 733]   | CT       | 0.27 |
| <i>rps3</i>  | 171  | C | 2 | 3092  | 37.22 | [1, 2769, 0, 322]   | CT CA    | 0.1  |
| <i>rps3</i>  | 441  | C | 2 | 4103  | 37.12 | [0, 3618, 0, 485]   | CT       | 0.12 |
| <i>rps3</i>  | 518  | C | 2 | 5831  | 37.6  | [1, 483, 0, 5347]   | CT CA    | 0.92 |
| <i>rps3</i>  | 737  | C | 2 | 4629  | 37.48 | [0, 1415, 0, 3214]  | CT       | 0.69 |
| <i>rps3</i>  | 914  | C | 2 | 3454  | 37.37 | [0, 1198, 1, 2255]  | CT CG    | 0.65 |
| <i>rps3</i>  | 1388 | C | 2 | 4619  | 37.57 | [0, 486, 0, 4133]   | CT       | 0.89 |
| <i>rps3</i>  | 1415 | C | 2 | 4212  | 37.51 | [11, 139, 6, 4056]  | CT CA CG | 0.97 |
| <i>rps3</i>  | 1526 | C | 2 | 15912 | 37.55 | [0, 12114, 1, 3797] | CT CG    | 0.24 |
| <i>rps3</i>  | 1612 | C | 2 | 14690 | 37.22 | [2, 725, 3, 13960]  | CT CG CA | 0.95 |
| <i>rps4</i>  | 38   | C | 2 | 927   | 37.63 | [0, 159, 0, 768]    | CT       | 0.83 |
| <i>rps4</i>  | 49   | C | 2 | 1020  | 37.67 | [0, 191, 1, 828]    | CT CG    | 0.81 |
| <i>rps4</i>  | 482  | C | 2 | 1795  | 37.61 | [0, 238, 0, 1557]   | CT       | 0.87 |
| <i>rps4</i>  | 668  | C | 2 | 2027  | 36.84 | [0, 1762, 1, 264]   | CT CG    | 0.13 |
| <i>rps4</i>  | 894  | C | 2 | 1387  | 37.04 | [1, 1044, 0, 342]   | CT CA    | 0.25 |
| <i>rps4</i>  | 914  | C | 2 | 1325  | 37.63 | [0, 157, 0, 1168]   | CT       | 0.88 |
| <i>rps4</i>  | 925  | C | 2 | 1516  | 37.59 | [0, 77, 0, 1439]    | CT       | 0.95 |
| <i>rps4</i>  | 935  | C | 2 | 1508  | 37.61 | [0, 171, 1, 1336]   | CT CG    | 0.89 |
| <i>rps4</i>  | 950  | C | 2 | 1569  | 37.39 | [0, 64, 0, 1505]    | CT       | 0.96 |
| <i>rps4</i>  | 1000 | C | 2 | 1287  | 37.38 | [0, 187, 0, 1100]   | CT       | 0.85 |
| <i>rps4</i>  | 1001 | C | 2 | 1314  | 37.63 | [0, 77, 0, 1237]    | CT       | 0.94 |
| <i>rps4</i>  | 1010 | C | 2 | 1400  | 37.67 | [0, 88, 0, 1312]    | CT       | 0.94 |
| <i>rps4</i>  | 1015 | C | 2 | 1365  | 37.72 | [1, 65, 0, 1299]    | CT CA    | 0.95 |
| <i>rps4</i>  | 1026 | C | 2 | 1407  | 37.24 | [0, 999, 0, 408]    | CT       | 0.29 |
| <i>rps7</i>  | 116  | C | 2 | 2269  | 37.59 | [4, 129, 1, 2135]   | CT CA CG | 0.94 |
| <i>rps7</i>  | 177  | C | 2 | 2187  | 37.17 | [3, 1912, 0, 272]   | CT CA    | 0.12 |
| <i>rps7</i>  | 309  | C | 2 | 1945  | 37.38 | [0, 1674, 0, 271]   | CT       | 0.14 |
| <i>rps7</i>  | 332  | C | 2 | 1851  | 37.46 | [0, 72, 0, 1779]    | CT       | 0.96 |
| <i>rps7</i>  | 426  | C | 2 | 1614  | 37.26 | [1, 1317, 0, 296]   | CT CA    | 0.18 |

|             |     |   |   |       |       |                    |          |      |
|-------------|-----|---|---|-------|-------|--------------------|----------|------|
| <i>sdh4</i> | 29  | C | 2 | 7608  | 37.77 | [1, 24, 5, 7578]   | CT CG CA | 1    |
| <i>sdh4</i> | 155 | C | 2 | 28019 | 37.66 | [2, 815, 0, 27202] | CT CA    | 0.97 |
| <i>sdh4</i> | 203 | C | 2 | 25138 | 37.7  | [7, 199, 1, 24931] | CT CA CG | 0.99 |
| <i>sdh4</i> | 259 | C | 2 | 17101 | 37.56 | [7, 181, 0, 16913] | CT CA    | 0.99 |
| <i>sdh4</i> | 348 | C | 2 | 5316  | 36.6  | [0, 4264, 2, 1050] | CT CG    | 0.2  |
| <i>sdh4</i> | 353 | C | 2 | 5428  | 37.18 | [0, 158, 0, 5270]  | CT       | 0.97 |

---

**Table S10.** RNA editing events predicted in *Punica granatum* mitochondrial genome based on online website PREPACT

| <b>Gene</b> | <b>Base</b> | <b>Aa</b> | <b>Triplet pos.</b> | <b>Bases</b> | <b>Codon</b> | <b>Aa change</b> |
|-------------|-------------|-----------|---------------------|--------------|--------------|------------------|
| <i>atp1</i> | 302         | 101       | 2                   | C→U          | GCG→GUG      | A→V              |
| <i>atp1</i> | 488         | 163       | 2                   | C→U          | GCG→GUG      | A→V              |
| <i>atp1</i> | 514         | 172       | 1                   | C→U          | CGU→UGU      | R→C              |
| <i>atp1</i> | 752         | 251       | 2                   | C→U          | GCU→GUU      | A→V              |
| <i>atp1</i> | 799         | 267       | 1                   | C→U          | CCU→UCU      | P→S              |
| <i>atp1</i> | 1316        | 439       | 2                   | C→U          | GCC→GUC      | A→V              |
| <i>atp4</i> | 59          | 20        | 2                   | C→U          | UCU→UUU      | S→F              |
| <i>atp4</i> | 89          | 30        | 2                   | C→U          | UCA→UUA      | S→L              |
| <i>atp4</i> | 118         | 40        | 1                   | C→U          | CGU→UGU      | R→C              |
| <i>atp4</i> | 215         | 72        | 2                   | C→U          | UCG→UUG      | S→L              |
| <i>atp4</i> | 227         | 76        | 2                   | C→U          | CCC→CUC      | P→L              |
| <i>atp4</i> | 248         | 83        | 2                   | C→U          | CCU→CUU      | P→L              |
| <i>atp4</i> | 251         | 84        | 2                   | C→U          | CCG→CUG      | P→L              |
| <i>atp4</i> | 395         | 132       | 2                   | C→U          | UCA→UUA      | S→L              |
| <i>atp4</i> | 407         | 136       | 2                   | C→U          | CCA→CUA      | P→L              |
| <i>atp4</i> | 416         | 139       | 2                   | C→U          | ACU→AUU      | T→I              |
| <i>atp6</i> | 119         | 40        | 2                   | C→U          | ACU→AUU      | T→I              |
| <i>atp6</i> | 329         | 110       | 2                   | C→U          | CCC→CUC      | P→L              |
| <i>atp6</i> | 373         | 125       | 1                   | C→U          | CUC→UUC      | L→F              |
| <i>atp6</i> | 406         | 136       | 1                   | C→U          | CUU→UUU      | L→F              |
| <i>atp6</i> | 461         | 154       | 2                   | C→U          | UCA→UUA      | S→L              |
| <i>atp6</i> | 520         | 174       | 1                   | C→U          | CCU→UCU      | P→S              |
| <i>atp6</i> | 523         | 175       | 1                   | C→U          | CAU→UAU      | H→Y              |
| <i>atp6</i> | 545         | 182       | 2                   | C→U          | UCA→UUA      | S→L              |
| <i>atp6</i> | 587         | 196       | 2                   | C→U          | UCA→UUA      | S→L              |
| <i>atp6</i> | 608         | 203       | 2                   | C→U          | UCC→UUC      | S→F              |
| <i>atp6</i> | 730         | 244       | 1                   | C→U          | CAU→UAU      | H→Y              |
| <i>atp6</i> | 737         | 246       | 2                   | C→U          | UCU→UUU      | S→F              |
| <i>atp6</i> | 746         | 249       | 2                   | C→U          | UCA→UUA      | S→L              |
| <i>atp8</i> | 47          | 16        | 2                   | C→U          | UCA→UUA      | S→L              |
| <i>atp8</i> | 58          | 20        | 1                   | C→U          | CUC→UUC      | L→F              |

|             |     |     |   |     |         |     |
|-------------|-----|-----|---|-----|---------|-----|
| <i>atp8</i> | 76  | 26  | 1 | C→U | CCC→UCC | P→S |
| <i>atp9</i> | 50  | 17  | 2 | C→U | UCA→UUA | S→L |
| <i>atp9</i> | 59  | 20  | 2 | C→U | GCU→GUU | A→V |
| <i>atp9</i> | 200 | 67  | 2 | C→U | GCC→GUC | A→V |
| <i>ccmB</i> | 28  | 10  | 1 | C→U | CAU→UAU | H→Y |
| <i>ccmB</i> | 71  | 24  | 2 | C→U | CCG→CUG | P→L |
| <i>ccmB</i> | 80  | 27  | 2 | C→U | UCG→UUG | S→L |
| <i>ccmB</i> | 128 | 43  | 2 | C→U | UCA→UUA | S→L |
| <i>ccmB</i> | 133 | 45  | 1 | C→U | CAU→UAU | H→Y |
| <i>ccmB</i> | 137 | 46  | 2 | C→U | UCC→UUC | S→F |
| <i>ccmB</i> | 149 | 50  | 2 | C→U | CCG→CUG | P→L |
| <i>ccmB</i> | 160 | 54  | 1 | C→U | CCU→UCU | P→S |
| <i>ccmB</i> | 164 | 55  | 2 | C→U | CCG→CUG | P→L |
| <i>ccmB</i> | 172 | 58  | 1 | C→U | CCU→UCU | P→S |
| <i>ccmB</i> | 179 | 60  | 2 | C→U | CCU→CUU | P→L |
| <i>ccmB</i> | 181 | 61  | 1 | C→U | CCC→UCC | P→S |
| <i>ccmB</i> | 193 | 65  | 1 | C→U | CCU→UCU | P→S |
| <i>ccmB</i> | 194 | 65  | 2 | C→U | UCU→UUU | S→F |
| <i>ccmB</i> | 286 | 96  | 1 | C→U | CGG→UGG | R→W |
| <i>ccmB</i> | 304 | 102 | 1 | C→U | CGU→UGU | R→C |
| <i>ccmB</i> | 313 | 105 | 1 | C→U | CGU→UGU | R→C |
| <i>ccmB</i> | 367 | 123 | 1 | C→U | CGG→UGG | R→W |
| <i>ccmB</i> | 392 | 131 | 2 | C→U | CCG→CUG | P→L |
| <i>ccmB</i> | 424 | 142 | 1 | C→U | CGU→UGU | R→C |
| <i>ccmB</i> | 428 | 143 | 2 | C→U | UCG→UUG | S→L |
| <i>ccmB</i> | 467 | 156 | 2 | C→U | UCG→UUG | S→L |
| <i>ccmB</i> | 476 | 159 | 2 | C→U | CCA→CUA | P→L |
| <i>ccmB</i> | 485 | 162 | 2 | C→U | UCA→UUA | S→L |
| <i>ccmB</i> | 494 | 165 | 2 | C→U | UCA→UUA | S→L |
| <i>ccmB</i> | 503 | 168 | 2 | C→U | CCA→CUA | P→L |
| <i>ccmB</i> | 506 | 169 | 2 | C→U | ACC→AUC | T→I |
| <i>ccmB</i> | 512 | 171 | 2 | C→U | UCU→UUU | S→F |
| <i>ccmB</i> | 514 | 172 | 1 | C→U | CGU→UGU | R→C |
| <i>ccmB</i> | 551 | 184 | 2 | C→U | UCA→UUA | S→L |



|              |     |     |   |     |         |     |
|--------------|-----|-----|---|-----|---------|-----|
| <i>ccmB</i>  | 554 | 185 | 2 | C→U | UCG→UUG | S→L |
| <i>ccmB</i>  | 566 | 189 | 2 | C→U | UCC→UUC | S→F |
| <i>ccmB</i>  | 569 | 190 | 2 | C→U | UCU→UUU | S→F |
| <i>ccmB</i>  | 572 | 191 | 2 | C→U | CCG→CUG | P→L |
| <i>ccmB</i>  | 596 | 199 | 2 | C→U | UCG→UUG | S→L |
| <i>ccmC</i>  | 103 | 35  | 1 | C→U | CAU→UAU | H→Y |
| <i>ccmC</i>  | 115 | 39  | 1 | C→U | CGG→UGG | R→W |
| <i>ccmC</i>  | 161 | 54  | 2 | C→U | CCG→CUG | P→L |
| <i>ccmC</i>  | 179 | 60  | 2 | C→U | GCG→GUG | A→V |
| <i>ccmC</i>  | 184 | 62  | 1 | C→U | CGG→UGG | R→W |
| <i>ccmC</i>  | 266 | 89  | 2 | C→U | UCU→UUU | S→F |
| <i>ccmC</i>  | 331 | 111 | 1 | C→U | CGG→UGG | R→W |
| <i>ccmC</i>  | 395 | 132 | 2 | C→U | UCG→UUG | S→L |
| <i>ccmC</i>  | 400 | 134 | 1 | C→U | CUU→UUU | L→F |
| <i>ccmC</i>  | 436 | 146 | 1 | C→U | CCU→UCU | P→S |
| <i>ccmC</i>  | 446 | 149 | 2 | C→U | CCG→CUG | P→L |
| <i>ccmC</i>  | 458 | 153 | 2 | C→U | UCA→UUA | S→L |
| <i>ccmC</i>  | 463 | 155 | 1 | C→U | CGU→UGU | R→C |
| <i>ccmC</i>  | 467 | 156 | 2 | C→U | GCU→GUU | A→V |
| <i>ccmC</i>  | 473 | 158 | 2 | C→U | CCG→CUG | P→L |
| <i>ccmC</i>  | 497 | 166 | 2 | C→U | UCU→UUU | S→F |
| <i>ccmC</i>  | 521 | 174 | 2 | C→U | UCG→UUG | S→L |
| <i>ccmC</i>  | 548 | 183 | 2 | C→U | UCU→UUU | S→F |
| <i>ccmC</i>  | 568 | 190 | 1 | C→U | CCU→UCU | P→S |
| <i>ccmC</i>  | 575 | 192 | 2 | C→U | CCC→CUC | P→L |
| <i>ccmC</i>  | 605 | 202 | 2 | C→U | UCC→UUC | S→F |
| <i>ccmC</i>  | 608 | 203 | 2 | C→U | CCC→CUC | P→L |
| <i>ccmC</i>  | 614 | 205 | 2 | C→U | UCA→UUA | S→L |
| <i>ccmC</i>  | 619 | 207 | 1 | C→U | CGU→UGU | R→C |
| <i>ccmC</i>  | 650 | 217 | 2 | C→U | CCU→CUU | P→L |
| <i>ccmC</i>  | 665 | 222 | 2 | C→U | CCC→CUC | P→L |
| <i>ccmFC</i> | 38  | 13  | 2 | C→U | UCC→UUC | S→F |
| <i>ccmFC</i> | 50  | 17  | 2 | C→U | CCU→CUU | P→L |
| <i>ccmFC</i> | 52  | 18  | 1 | C→U | CGU→UGU | R→C |

|              |      |     |   |     |         |     |
|--------------|------|-----|---|-----|---------|-----|
| <i>ccmFC</i> | 100  | 34  | 1 | C→U | CCC→UCC | P→S |
| <i>ccmFC</i> | 104  | 35  | 2 | C→U | ACA→AUA | T→I |
| <i>ccmFC</i> | 116  | 39  | 2 | C→U | UCU→UUU | S→F |
| <i>ccmFC</i> | 119  | 40  | 2 | C→U | UCC→UUC | S→F |
| <i>ccmFC</i> | 143  | 48  | 2 | C→U | CCU→CUU | P→L |
| <i>ccmFC</i> | 148  | 50  | 1 | C→U | CCU→UCU | P→S |
| <i>ccmFC</i> | 152  | 51  | 2 | C→U | UCA→UUA | S→L |
| <i>ccmFC</i> | 157  | 53  | 1 | C→U | CCU→UCU | P→S |
| <i>ccmFC</i> | 160  | 54  | 1 | C→U | CUU→UUU | L→F |
| <i>ccmFC</i> | 293  | 98  | 2 | C→U | UCA→UUA | S→L |
| <i>ccmFC</i> | 298  | 100 | 1 | C→U | CGU→UGU | R→C |
| <i>ccmFC</i> | 322  | 108 | 1 | C→U | CUU→UUU | L→F |
| <i>ccmFC</i> | 335  | 112 | 2 | C→U | UCC→UUC | S→F |
| <i>ccmFC</i> | 379  | 127 | 1 | C→U | CGU→UGU | R→C |
| <i>ccmFC</i> | 394  | 132 | 1 | C→U | CGU→UGU | R→C |
| <i>ccmFC</i> | 400  | 134 | 1 | C→U | CUC→UUC | L→F |
| <i>ccmFC</i> | 407  | 136 | 2 | C→U | UCU→UUU | S→F |
| <i>ccmFC</i> | 587  | 196 | 2 | C→U | UCG→UUG | S→L |
| <i>ccmFC</i> | 701  | 234 | 2 | C→U | CCA→CUA | P→L |
| <i>ccmFC</i> | 872  | 291 | 2 | C→U | UCU→UUU | S→F |
| <i>ccmFC</i> | 925  | 309 | 1 | C→U | CGG→UGG | R→W |
| <i>ccmFC</i> | 1012 | 338 | 1 | C→U | CAU→UAU | H→Y |
| <i>ccmFC</i> | 1133 | 378 | 2 | C→U | CCA→CUA | P→L |
| <i>ccmFC</i> | 1172 | 391 | 2 | C→U | UCC→UUC | S→F |
| <i>ccmFC</i> | 1228 | 410 | 1 | C→U | CGG→UGG | R→W |
| <i>ccmFC</i> | 1262 | 421 | 2 | C→U | UCG→UUG | S→L |
| <i>ccmFC</i> | 1309 | 437 | 1 | C→U | CGA→UGA | R→* |
| <i>ccmFN</i> | 29   | 10  | 2 | C→U | UCG→UUG | S→L |
| <i>ccmFN</i> | 37   | 13  | 1 | C→U | CCG→UCG | P→S |
| <i>ccmFN</i> | 98   | 33  | 2 | C→U | CCC→CUC | P→L |
| <i>ccmFN</i> | 137  | 46  | 2 | C→U | UCG→UUG | S→L |
| <i>ccmFN</i> | 142  | 48  | 1 | C→U | CGU→UGU | R→C |
| <i>ccmFN</i> | 151  | 51  | 1 | C→U | CCG→UCG | P→S |
| <i>ccmFN</i> | 248  | 83  | 2 | C→U | UCA→UUA | S→L |

|              |      |     |   |     |         |     |
|--------------|------|-----|---|-----|---------|-----|
| <i>ccmFN</i> | 256  | 86  | 1 | C→U | CGG→UGG | R→W |
| <i>ccmFN</i> | 263  | 88  | 2 | C→U | CCA→CUA | P→L |
| <i>ccmFN</i> | 356  | 119 | 2 | C→U | UCC→UUC | S→F |
| <i>ccmFN</i> | 544  | 182 | 1 | C→U | CCU→UCU | P→S |
| <i>ccmFN</i> | 688  | 230 | 1 | C→U | CCU→UCU | P→S |
| <i>ccmFN</i> | 689  | 230 | 2 | C→U | UCU→UUU | S→F |
| <i>ccmFN</i> | 736  | 246 | 1 | C→U | CGU→UGU | R→C |
| <i>ccmFN</i> | 758  | 253 | 2 | C→U | UCA→UUA | S→L |
| <i>ccmFN</i> | 770  | 257 | 2 | C→U | CCA→CUA | P→L |
| <i>ccmFN</i> | 785  | 262 | 2 | C→U | UCA→UUA | S→L |
| <i>ccmFN</i> | 934  | 312 | 1 | C→U | CGU→UGU | R→C |
| <i>ccmFN</i> | 1055 | 352 | 2 | C→U | CCG→CUG | P→L |
| <i>ccmFN</i> | 1178 | 393 | 2 | C→U | UCG→UUG | S→L |
| <i>ccmFN</i> | 1181 | 394 | 2 | C→U | CCU→CUU | P→L |
| <i>ccmFN</i> | 1261 | 421 | 1 | C→U | CGG→UGG | R→W |
| <i>ccmFN</i> | 1289 | 430 | 2 | C→U | CCA→CUA | P→L |
| <i>ccmFN</i> | 1306 | 436 | 1 | C→U | CAU→UAU | H→Y |
| <i>ccmFN</i> | 1321 | 441 | 1 | C→U | CGG→UGG | R→W |
| <i>ccmFN</i> | 1339 | 447 | 1 | C→U | CGG→UGG | R→W |
| <i>ccmFN</i> | 1372 | 458 | 1 | C→U | CGG→UGG | R→W |
| <i>ccmFN</i> | 1390 | 464 | 1 | C→U | CGU→UGU | R→C |
| <i>ccmFN</i> | 1414 | 472 | 1 | C→U | CUU→UUU | L→F |
| <i>ccmFN</i> | 1433 | 478 | 2 | C→U | UCG→UUG | S→L |
| <i>ccmFN</i> | 1453 | 485 | 1 | C→U | CUU→UUU | L→F |
| <i>ccmFN</i> | 1481 | 494 | 2 | C→U | UCA→UUA | S→L |
| <i>ccmFN</i> | 1523 | 508 | 2 | C→U | ACA→AUA | T→I |
| <i>coxI</i>  | 92   | 31  | 2 | C→U | ACU→AUU | T→I |
| <i>coxI</i>  | 134  | 45  | 2 | C→U | ACA→AUA | T→I |
| <i>coxI</i>  | 199  | 67  | 1 | C→U | CAU→UAU | H→Y |
| <i>coxI</i>  | 205  | 69  | 1 | C→U | CUU→UUU | L→F |
| <i>coxI</i>  | 281  | 94  | 2 | C→U | UCU→UUU | S→F |
| <i>coxI</i>  | 293  | 98  | 2 | C→U | UCU→UUU | S→F |
| <i>coxI</i>  | 391  | 131 | 1 | C→U | CCA→UCA | P→S |
| <i>coxI</i>  | 485  | 162 | 2 | C→U | GCA→GUA | A→V |

|             |      |     |   |     |         |     |
|-------------|------|-----|---|-----|---------|-----|
| <i>cox1</i> | 491  | 164 | 2 | C→U | UCU→UUU | S→F |
| <i>cox1</i> | 496  | 166 | 1 | C→U | CUU→UUU | L→F |
| <i>cox1</i> | 554  | 185 | 2 | C→U | UCC→UUC | S→F |
| <i>cox1</i> | 590  | 197 | 2 | C→U | UCA→UUA | S→L |
| <i>cox1</i> | 614  | 205 | 2 | C→U | CCA→CUA | P→L |
| <i>cox1</i> | 629  | 210 | 2 | C→U | CCA→CUA | P→L |
| <i>cox1</i> | 754  | 252 | 1 | C→U | CGG→UGG | R→W |
| <i>cox1</i> | 785  | 262 | 2 | C→U | CCC→CUC | P→L |
| <i>cox1</i> | 800  | 267 | 2 | C→U | UCC→UUC | S→F |
| <i>cox1</i> | 1076 | 359 | 2 | C→U | UCC→UUC | S→F |
| <i>cox1</i> | 1118 | 373 | 2 | C→U | CCG→CUG | P→L |
| <i>cox1</i> | 1225 | 409 | 1 | C→U | CAC→UAC | H→Y |
| <i>cox1</i> | 1313 | 438 | 2 | C→U | CCG→CUG | P→L |
| <i>cox1</i> | 1318 | 440 | 1 | C→U | CUC→UUC | L→F |
| <i>cox2</i> | 229  | 77  | 1 | C→U | CCU→UCU | P→S |
| <i>cox2</i> | 260  | 87  | 2 | C→U | CCC→CUC | P→L |
| <i>cox2</i> | 326  | 109 | 2 | C→U | GCU→GUU | A→V |
| <i>cox2</i> | 346  | 116 | 1 | C→U | CGG→UGG | R→W |
| <i>cox2</i> | 521  | 174 | 2 | C→U | GCA→GUA | A→V |
| <i>cox2</i> | 535  | 179 | 1 | C→U | CGU→UGU | R→C |
| <i>cox2</i> | 550  | 184 | 1 | C→U | CCU→UCU | P→S |
| <i>cox2</i> | 704  | 235 | 2 | C→U | ACG→AUG | T→M |
| <i>cox3</i> | 262  | 88  | 1 | C→U | CAC→UAC | H→Y |
| <i>cox3</i> | 266  | 89  | 2 | C→U | CCA→CUA | P→L |
| <i>cox3</i> | 289  | 97  | 1 | C→U | CUC→UUC | L→F |
| <i>cox3</i> | 301  | 101 | 1 | C→U | CUC→UUC | L→F |
| <i>cox3</i> | 385  | 129 | 1 | C→U | CAU→UAU | H→Y |
| <i>cox3</i> | 469  | 157 | 1 | C→U | CGG→UGG | R→W |
| <i>cox3</i> | 473  | 158 | 2 | C→U | GCU→GUU | A→V |
| <i>cox3</i> | 524  | 175 | 2 | C→U | CCA→CUA | P→L |
| <i>cox3</i> | 547  | 183 | 1 | C→U | CCU→UCU | P→S |
| <i>cox3</i> | 548  | 183 | 2 | C→U | UCU→UUU | S→F |
| <i>cox3</i> | 613  | 205 | 1 | C→U | CAU→UAU | H→Y |
| <i>cox3</i> | 616  | 206 | 1 | C→U | CAU→UAU | H→Y |

|             |      |     |   |     |         |     |
|-------------|------|-----|---|-----|---------|-----|
| <i>cox3</i> | 815  | 272 | 2 | C→U | UCG→UUG | S→L |
| <i>cox3</i> | 916  | 306 | 1 | C→U | CGG→UGG | R→W |
| <i>cob</i>  | 37   | 13  | 1 | C→U | CCU→UCU | P→S |
| <i>cob</i>  | 38   | 13  | 2 | C→U | UCU→UUU | S→F |
| <i>cob</i>  | 283  | 95  | 1 | C→U | CUC→UUC | L→F |
| <i>cob</i>  | 295  | 99  | 1 | C→U | CAC→UAC | H→Y |
| <i>cob</i>  | 355  | 119 | 1 | C→U | CGG→UGG | R→W |
| <i>cob</i>  | 473  | 158 | 2 | C→U | GCC→GUC | A→V |
| <i>cob</i>  | 853  | 285 | 1 | C→U | CAU→UAU | H→Y |
| <i>cob</i>  | 875  | 292 | 2 | C→U | CCU→CUU | P→L |
| <i>cob</i>  | 908  | 303 | 2 | C→U | CCA→CUA | P→L |
| <i>cob</i>  | 1045 | 349 | 1 | C→U | CCU→UCU | P→S |
| <i>cob</i>  | 1046 | 349 | 2 | C→U | UCU→UUU | S→F |
| <i>matR</i> | 166  | 56  | 1 | C→U | CAC→UAC | H→Y |
| <i>matR</i> | 236  | 79  | 2 | C→U | UCC→UUC | S→F |
| <i>matR</i> | 292  | 98  | 1 | C→U | CCC→UCC | P→S |
| <i>matR</i> | 317  | 106 | 2 | C→U | UCG→UUG | S→L |
| <i>matR</i> | 413  | 138 | 2 | C→U | UCG→UUG | S→L |
| <i>matR</i> | 481  | 161 | 1 | C→U | CCC→UCC | P→S |
| <i>matR</i> | 482  | 161 | 2 | C→U | UCC→UUC | S→F |
| <i>matR</i> | 899  | 300 | 2 | C→U | UCA→UUA | S→L |
| <i>matR</i> | 1519 | 507 | 1 | C→U | CCC→UCC | P→S |
| <i>matR</i> | 1655 | 552 | 2 | C→U | UCC→UUC | S→F |
| <i>matR</i> | 1676 | 559 | 2 | C→U | CCU→CUU | P→L |
| <i>matR</i> | 1732 | 578 | 1 | C→U | CAC→UAC | H→Y |
| <i>matR</i> | 1820 | 607 | 2 | C→U | UCA→UUA | S→L |
| <i>mttB</i> | 74   | 25  | 2 | C→U | UCC→UUC | S→F |
| <i>mttB</i> | 79   | 27  | 1 | C→U | CGG→UGG | R→W |
| <i>mttB</i> | 94   | 32  | 1 | C→U | CUU→UUU | L→F |
| <i>mttB</i> | 127  | 43  | 1 | C→U | CCG→UCG | P→S |
| <i>mttB</i> | 143  | 48  | 2 | C→U | UCU→UUU | S→F |
| <i>mttB</i> | 146  | 49  | 2 | C→U | CCA→CUA | P→L |
| <i>mttB</i> | 203  | 68  | 2 | C→U | UCA→UUA | S→L |
| <i>mttB</i> | 217  | 73  | 1 | C→U | CCG→UCG | P→S |

|             |      |     |   |     |         |     |
|-------------|------|-----|---|-----|---------|-----|
| <i>mttB</i> | 239  | 80  | 2 | C→U | UCA→UUA | S→L |
| <i>mttB</i> | 251  | 84  | 2 | C→U | UCU→UUU | S→F |
| <i>mttB</i> | 277  | 93  | 1 | C→U | CAU→UAU | H→Y |
| <i>mttB</i> | 346  | 116 | 1 | C→U | CAU→UAU | H→Y |
| <i>mttB</i> | 359  | 120 | 2 | C→U | UCU→UUU | S→F |
| <i>mttB</i> | 368  | 123 | 2 | C→U | UCC→UUC | S→F |
| <i>mttB</i> | 388  | 130 | 1 | C→U | CCU→UCU | P→S |
| <i>mttB</i> | 389  | 130 | 2 | C→U | UCU→UUU | S→F |
| <i>mttB</i> | 391  | 131 | 1 | C→U | CCC→UCC | P→S |
| <i>mttB</i> | 394  | 132 | 1 | C→U | CGG→UGG | R→W |
| <i>mttB</i> | 422  | 141 | 2 | C→U | UCA→UUA | S→L |
| <i>mttB</i> | 452  | 151 | 2 | C→U | UCG→UUG | S→L |
| <i>mttB</i> | 512  | 171 | 2 | C→U | UCG→UUG | S→L |
| <i>mttB</i> | 520  | 174 | 1 | C→U | CCC→UCC | P→S |
| <i>mttB</i> | 563  | 188 | 2 | C→U | CCA→CUA | P→L |
| <i>mttB</i> | 569  | 190 | 2 | C→U | CCU→CUU | P→L |
| <i>mttB</i> | 625  | 209 | 1 | C→U | CCG→UCG | P→S |
| <i>mttB</i> | 647  | 216 | 2 | C→U | UCC→UUC | S→F |
| <i>mttB</i> | 682  | 228 | 1 | C→U | CGU→UGU | R→C |
| <i>mttB</i> | 728  | 243 | 2 | C→U | UCG→UUG | S→L |
| <i>nad1</i> | 208  | 70  | 1 | C→U | CCA→UCA | P→S |
| <i>nad1</i> | 299  | 100 | 2 | C→U | UCA→UUA | S→L |
| <i>nad1</i> | 430  | 144 | 1 | C→U | CGG→UGG | R→W |
| <i>nad1</i> | 467  | 156 | 2 | C→U | UCA→UUA | S→L |
| <i>nad1</i> | 541  | 181 | 1 | C→U | CGG→UGG | R→W |
| <i>nad1</i> | 635  | 212 | 2 | C→U | ACU→AUU | T→I |
| <i>nad1</i> | 803  | 268 | 2 | C→U | UCA→UUA | S→L |
| <i>nad1</i> | 842  | 281 | 2 | C→U | UCU→UUU | S→F |
| <i>nad1</i> | 847  | 283 | 1 | C→U | CUU→UUU | L→F |
| <i>nad1</i> | 904  | 302 | 1 | C→U | CUC→UUC | L→F |
| <i>nad1</i> | 938  | 313 | 2 | C→U | CCG→CUG | P→L |
| <i>nad1</i> | 1045 | 349 | 1 | C→U | CGG→UGG | R→W |
| <i>nad2</i> | 347  | 116 | 2 | C→U | ACA→AUA | T→I |
| <i>nad2</i> | 482  | 161 | 2 | C→U | UCA→UUA | S→L |

|             |      |     |   |     |         |     |
|-------------|------|-----|---|-----|---------|-----|
| <i>nad2</i> | 578  | 193 | 2 | C→U | UCG→UUG | S→L |
| <i>nad2</i> | 604  | 202 | 1 | C→U | CCC→UCC | P→S |
| <i>nad2</i> | 770  | 257 | 2 | C→U | GCA→GUA | A→V |
| <i>nad2</i> | 793  | 265 | 1 | C→U | CCU→UCU | P→S |
| <i>nad2</i> | 815  | 272 | 2 | C→U | CCC→CUC | P→L |
| <i>nad2</i> | 818  | 273 | 2 | C→U | ACC→AUC | T→I |
| <i>nad2</i> | 881  | 294 | 2 | C→U | UCC→UUC | S→F |
| <i>nad2</i> | 1043 | 348 | 2 | C→U | ACU→AUU | T→I |
| <i>nad2</i> | 1100 | 367 | 2 | C→U | UCA→UUA | S→L |
| <i>nad2</i> | 1169 | 390 | 2 | C→U | ACC→AUC | T→I |
| <i>nad2</i> | 1310 | 437 | 2 | C→U | GCC→GUC | A→V |
| <i>nad3</i> | 56   | 19  | 2 | C→U | UCU→UUU | S→F |
| <i>nad3</i> | 77   | 26  | 2 | C→U | CCG→CUG | P→L |
| <i>nad3</i> | 167  | 56  | 2 | C→U | UCC→UUC | S→F |
| <i>nad3</i> | 229  | 77  | 1 | C→U | CCU→UCU | P→S |
| <i>nad3</i> | 230  | 77  | 2 | C→U | UCU→UUU | S→F |
| <i>nad3</i> | 245  | 82  | 2 | C→U | ACC→AUC | T→I |
| <i>nad3</i> | 271  | 91  | 1 | C→U | CCC→UCC | P→S |
| <i>nad3</i> | 272  | 91  | 2 | C→U | UCC→UUC | S→F |
| <i>nad3</i> | 287  | 96  | 2 | C→U | CCG→CUG | P→L |
| <i>nad3</i> | 296  | 99  | 2 | C→U | UCU→UUU | S→F |
| <i>nad3</i> | 338  | 113 | 2 | C→U | UCU→UUU | S→F |
| <i>nad3</i> | 340  | 114 | 1 | C→U | CUC→UUC | L→F |
| <i>nad4</i> | 212  | 71  | 2 | C→U | CCU→CUU | P→L |
| <i>nad4</i> | 328  | 110 | 1 | C→U | CCU→UCU | P→S |
| <i>nad4</i> | 329  | 110 | 2 | C→U | UCU→UUU | S→F |
| <i>nad4</i> | 349  | 117 | 1 | C→U | CCC→UCC | P→S |
| <i>nad4</i> | 350  | 117 | 2 | C→U | UCC→UUC | S→F |
| <i>nad4</i> | 362  | 121 | 2 | C→U | CCA→CUA | P→L |
| <i>nad4</i> | 436  | 146 | 1 | C→U | CUU→UUU | L→F |
| <i>nad4</i> | 448  | 150 | 1 | C→U | CUU→UUU | L→F |
| <i>nad4</i> | 487  | 163 | 1 | C→U | CUU→UUU | L→F |
| <i>nad4</i> | 497  | 166 | 2 | C→U | ACA→AUA | T→I |
| <i>nad4</i> | 521  | 174 | 2 | C→U | UCA→UUA | S→L |

|              |      |     |   |     |         |     |
|--------------|------|-----|---|-----|---------|-----|
| <i>nad4</i>  | 613  | 205 | 1 | C→U | CAU→UAU | H→Y |
| <i>nad4</i>  | 680  | 227 | 2 | C→U | CCU→CUU | P→L |
| <i>nad4</i>  | 716  | 239 | 2 | C→U | UCA→UUA | S→L |
| <i>nad4</i>  | 749  | 250 | 2 | C→U | UCC→UUC | S→F |
| <i>nad4</i>  | 872  | 291 | 2 | C→U | ACU→AUU | T→I |
| <i>nad4</i>  | 923  | 308 | 2 | C→U | CCG→CUG | P→L |
| <i>nad4</i>  | 1045 | 349 | 1 | C→U | CCU→UCU | P→S |
| <i>nad4</i>  | 1055 | 352 | 2 | C→U | UCC→UUC | S→F |
| <i>nad4</i>  | 1061 | 354 | 2 | C→U | UCU→UUU | S→F |
| <i>nad4</i>  | 1067 | 356 | 2 | C→U | ACU→AUU | T→I |
| <i>nad4</i>  | 1085 | 362 | 2 | C→U | UCA→UUA | S→L |
| <i>nad4</i>  | 1118 | 373 | 2 | C→U | CCC→CUC | P→L |
| <i>nad4</i>  | 1160 | 387 | 2 | C→U | ACA→AUA | T→I |
| <i>nad4</i>  | 1229 | 410 | 2 | C→U | UCU→UUU | S→F |
| <i>nad4</i>  | 1268 | 423 | 2 | C→U | CCA→CUA | P→L |
| <i>nad4</i>  | 1346 | 449 | 2 | C→U | CCG→CUG | P→L |
| <i>nad4L</i> | 35   | 12  | 2 | C→U | UCU→UUU | S→F |
| <i>nad4L</i> | 89   | 30  | 2 | C→U | UCA→UUA | S→L |
| <i>nad4L</i> | 104  | 35  | 2 | C→U | UCA→UUA | S→L |
| <i>nad4L</i> | 152  | 51  | 2 | C→U | UCG→UUG | S→L |
| <i>nad4L</i> | 182  | 61  | 2 | C→U | UCA→UUA | S→L |
| <i>nad4L</i> | 191  | 64  | 2 | C→U | CCA→CUA | P→L |
| <i>nad5</i>  | 116  | 39  | 2 | C→U | UCG→UUG | S→L |
| <i>nad5</i>  | 212  | 71  | 2 | C→U | GCU→GUU | A→V |
| <i>nad5</i>  | 239  | 80  | 2 | C→U | CCG→CUG | P→L |
| <i>nad5</i>  | 355  | 119 | 1 | C→U | CUU→UUU | L→F |
| <i>nad5</i>  | 395  | 132 | 2 | C→U | UCU→UUU | S→F |
| <i>nad5</i>  | 502  | 168 | 1 | C→U | CCU→UCU | P→S |
| <i>nad5</i>  | 503  | 168 | 2 | C→U | UCU→UUU | S→F |
| <i>nad5</i>  | 611  | 204 | 2 | C→U | GCC→GUC | A→V |
| <i>nad5</i>  | 614  | 205 | 2 | C→U | CCC→CUC | P→L |
| <i>nad5</i>  | 649  | 217 | 1 | C→U | CUU→UUU | L→F |
| <i>nad5</i>  | 689  | 230 | 2 | C→U | UCG→UUG | S→L |
| <i>nad5</i>  | 695  | 232 | 2 | C→U | ACU→AUU | T→I |



|             |      |     |   |     |         |     |
|-------------|------|-----|---|-----|---------|-----|
| <i>nad5</i> | 701  | 234 | 2 | C→U | UCA→UUA | S→L |
| <i>nad5</i> | 836  | 279 | 2 | C→U | ACU→AUU | T→I |
| <i>nad5</i> | 875  | 292 | 2 | C→U | ACU→AUU | T→I |
| <i>nad5</i> | 1366 | 456 | 1 | C→U | CAU→UAU | H→Y |
| <i>nad5</i> | 1375 | 459 | 1 | C→U | CCC→UCC | P→S |
| <i>nad5</i> | 1397 | 466 | 2 | C→U | UCA→UUA | S→L |
| <i>nad5</i> | 1523 | 508 | 2 | C→U | UCC→UUC | S→F |
| <i>nad5</i> | 1535 | 512 | 2 | C→U | GCU→GUU | A→V |
| <i>nad5</i> | 1586 | 529 | 2 | C→U | ACU→AUU | T→I |
| <i>nad5</i> | 1619 | 540 | 2 | C→U | CCC→CUC | P→L |
| <i>nad6</i> | 70   | 24  | 1 | C→U | CAU→UAU | H→Y |
| <i>nad6</i> | 86   | 29  | 2 | C→U | CCC→CUC | P→L |
| <i>nad6</i> | 92   | 31  | 2 | C→U | CCA→CUA | P→L |
| <i>nad6</i> | 143  | 48  | 2 | C→U | UCC→UUC | S→F |
| <i>nad6</i> | 158  | 53  | 2 | C→U | CCA→CUA | P→L |
| <i>nad7</i> | 38   | 13  | 2 | C→U | UCG→UUG | S→L |
| <i>nad7</i> | 77   | 26  | 2 | C→U | UCA→UUA | S→L |
| <i>nad7</i> | 83   | 28  | 2 | C→U | UCA→UUA | S→L |
| <i>nad7</i> | 200  | 67  | 2 | C→U | UCU→UUU | S→F |
| <i>nad7</i> | 224  | 75  | 2 | C→U | ACG→AUG | T→M |
| <i>nad7</i> | 244  | 82  | 1 | C→U | CAU→UAU | H→Y |
| <i>nad7</i> | 251  | 84  | 2 | C→U | UCA→UUA | S→L |
| <i>nad7</i> | 316  | 106 | 1 | C→U | CGU→UGU | R→C |
| <i>nad7</i> | 335  | 112 | 2 | C→U | UCA→UUA | S→L |
| <i>nad7</i> | 344  | 115 | 2 | C→U | UCA→UUA | S→L |
| <i>nad7</i> | 383  | 128 | 2 | C→U | UCA→UUA | S→L |
| <i>nad7</i> | 533  | 178 | 2 | C→U | UCC→UUC | S→F |
| <i>nad7</i> | 578  | 193 | 2 | C→U | UCA→UUA | S→L |
| <i>nad7</i> | 698  | 233 | 2 | C→U | UCG→UUG | S→L |
| <i>nad7</i> | 724  | 242 | 1 | C→U | CAU→UAU | H→Y |
| <i>nad7</i> | 734  | 245 | 2 | C→U | UCG→UUG | S→L |
| <i>nad7</i> | 739  | 247 | 1 | C→U | CUU→UUU | L→F |
| <i>nad7</i> | 769  | 257 | 1 | C→U | CGC→UGC | R→C |
| <i>nad7</i> | 926  | 309 | 2 | C→U | UCA→UUA | S→L |

|              |      |     |   |     |         |     |
|--------------|------|-----|---|-----|---------|-----|
| <i>nad7</i>  | 973  | 325 | 1 | C→U | CCU→UCU | P→S |
| <i>nad7</i>  | 1057 | 353 | 1 | C→U | CGU→UGU | R→C |
| <i>nad7</i>  | 1079 | 360 | 2 | C→U | UCU→UUU | S→F |
| <i>nad7</i>  | 1088 | 363 | 2 | C→U | UCA→UUA | S→L |
| <i>nad7</i>  | 1103 | 368 | 2 | C→U | UCU→UUU | S→F |
| <i>nad7</i>  | 1124 | 375 | 2 | C→U | CCA→CUA | P→L |
| <i>nad9</i>  | 92   | 31  | 2 | C→U | UCU→UUU | S→F |
| <i>nad9</i>  | 113  | 38  | 2 | C→U | CCA→CUA | P→L |
| <i>nad9</i>  | 167  | 56  | 2 | C→U | UCG→UUG | S→L |
| <i>nad9</i>  | 190  | 64  | 1 | C→U | CAU→UAU | H→Y |
| <i>nad9</i>  | 328  | 110 | 1 | C→U | CGG→UGG | R→W |
| <i>nad9</i>  | 368  | 123 | 2 | C→U | UCC→UUC | S→F |
| <i>nad9</i>  | 398  | 133 | 2 | C→U | UCA→UUA | S→L |
| <i>nad9</i>  | 439  | 147 | 1 | C→U | CUU→UUU | L→F |
| <i>rpl2</i>  | 1271 | 424 | 2 | C→U | GCG→GUG | A→V |
| <i>rpl2</i>  | 404  | 135 | 2 | C→U | GCG→GUG | A→V |
| <i>rpl5</i>  | 7    | 3   | 1 | C→U | CCA→UCA | P→S |
| <i>rpl5</i>  | 35   | 12  | 2 | C→U | UCA→UUA | S→L |
| <i>rpl5</i>  | 59   | 20  | 2 | C→U | CCG→CUG | P→L |
| <i>rpl5</i>  | 92   | 31  | 2 | C→U | UCG→UUG | S→L |
| <i>rpl5</i>  | 169  | 57  | 1 | C→U | CGC→UGC | R→C |
| <i>rpl5</i>  | 329  | 110 | 2 | C→U | UCG→UUG | S→L |
| <i>rpl5</i>  | 512  | 171 | 2 | C→U | CCA→CUA | P→L |
| <i>rpl10</i> | 239  | 80  | 2 | C→U | UCG→UUG | S→L |
| <i>rpl16</i> | 37   | 13  | 1 | C→U | CGU→UGU | R→C |
| <i>rpl16</i> | 104  | 35  | 2 | C→U | ACU→AUU | T→I |
| <i>rpl16</i> | 176  | 59  | 2 | C→U | UCC→UUC | S→F |
| <i>rpl16</i> | 208  | 70  | 1 | C→U | CUC→UUC | L→F |
| <i>rpl16</i> | 377  | 126 | 2 | C→U | CCA→CUA | P→L |
| <i>rpl16</i> | 383  | 128 | 2 | C→U | UCG→UUG | S→L |
| <i>rps1</i>  | 209  | 70  | 2 | C→U | UCC→UUC | S→F |
| <i>rps1</i>  | 338  | 113 | 2 | C→U | UCC→UUC | S→F |
| <i>rps1</i>  | 524  | 175 | 2 | C→U | CCU→CUU | P→L |
| <i>rps1</i>  | 560  | 187 | 2 | C→U | ACC→AUC | T→I |

|              |      |     |   |     |         |     |
|--------------|------|-----|---|-----|---------|-----|
| <i>rps3</i>  | 616  | 206 | 1 | C→U | CUU→UUU | L→F |
| <i>rps3</i>  | 674  | 225 | 2 | C→U | CCC→CUC | P→L |
| <i>rps3</i>  | 1481 | 494 | 2 | C→U | UCA→UUA | S→L |
| <i>rps4</i>  | 38   | 13  | 2 | C→U | UCA→UUA | S→L |
| <i>rps4</i>  | 49   | 17  | 1 | C→U | CGG→UGG | R→W |
| <i>rps4</i>  | 464  | 155 | 2 | C→U | UCU→UUU | S→F |
| <i>rps4</i>  | 482  | 161 | 2 | C→U | UCA→UUA | S→L |
| <i>rps4</i>  | 529  | 177 | 1 | C→U | CGG→UGG | R→W |
| <i>rps4</i>  | 721  | 241 | 1 | C→U | CAU→UAU | H→Y |
| <i>rps4</i>  | 775  | 259 | 1 | C→U | CCU→UCU | P→S |
| <i>rps4</i>  | 905  | 302 | 2 | C→U | UCG→UUG | S→L |
| <i>rps4</i>  | 916  | 306 | 1 | C→U | CAU→UAU | H→Y |
| <i>rps4</i>  | 926  | 309 | 2 | C→U | CCA→CUA | P→L |
| <i>rps4</i>  | 941  | 314 | 2 | C→U | UCU→UUU | S→F |
| <i>rps7</i>  | 116  | 39  | 2 | C→U | CCA→CUA | P→L |
| <i>rps7</i>  | 277  | 93  | 1 | C→U | CUU→UUU | L→F |
| <i>rps7</i>  | 332  | 111 | 2 | C→U | UCA→UUA | S→L |
| <i>rps7</i>  | 335  | 112 | 2 | C→U | UCU→UUU | S→F |
| <i>rps10</i> | 235  | 79  | 1 | C→U | CGG→UGG | R→W |
| <i>rps10</i> | 313  | 105 | 1 | C→U | CUC→UUC | L→F |
| <i>rps12</i> | 284  | 95  | 2 | C→U | UCC→UUC | S→F |
| <i>rps14</i> | 188  | 63  | 2 | C→U | UCC→UUC | S→F |
| <i>rps14</i> | 199  | 67  | 1 | C→U | CCU→UCU | P→S |
| <i>rps19</i> | 163  | 55  | 1 | C→U | CCU→UCU | P→S |
| <i>rps19</i> | 164  | 55  | 2 | C→U | UCU→UUU | S→F |
| <i>rps19</i> | 242  | 81  | 2 | C→U | UCG→UUG | S→L |
| <i>sdh4</i>  | 916  | 306 | 1 | C→U | CGG→UGG | R→W |

---
